# Supplementary material for: The Lewis superacidic aluminium cation: [(NHC)Al(C6F5)2]+
Source: Royal Society of Chemistry journal article supplement (doi:10.1039/d3cc05440c), 2023-12-06
Supplement: d3cc05440c1.pdf [file d3cc05440c1.pdf]

## Electronic Supplementary Information

### The Lewis Superacidic Aluminum Cation: [(NHC)Al(C<sub>6</sub>F<sub>5</sub>)<sub>2</sub>]<sup>+</sup>

Shaoying Ju,<sup>a</sup> Chi Zhang,<sup>b</sup> Beili Tang,<sup>a</sup> Liu Leo Liu,<sup>b</sup>

Douglas W. Stephan<sup>\*a,c</sup> and Yile Wu<sup>\*a</sup>

<sup>a</sup> Institute of Drug Discovery Technology, Ningbo University, Ningbo 315211, Zhejiang, China.

[wuyile@nbu.edu.cn](mailto:wuyile@nbu.edu.cn)

<sup>b</sup> Department of Chemistry, Shenzhen Grubbs Institute and Guangdong Provincial Key Laboratory of Catalysis, Southern University of Science and Technology, Shenzhen 518055, China.

<sup>c</sup> Department of Chemistry, University of Toronto, Toronto, 80 St. George Street, Ontario M5S 3H6, Canada.

[dstephan@chem.utoronto.ca](mailto:dstephan@chem.utoronto.ca)

## Table of Contents

|                                      |    |
|--------------------------------------|----|
| General Considerations .....         | 3  |
| Experimental Procedures .....        | 4  |
| Synthesis of compound <b>1</b> ..... | 4  |
| Synthesis of compound <b>2</b> ..... | 5  |
| Synthesis of compound <b>3</b> ..... | 6  |
| Synthesis of compound <b>4</b> ..... | 8  |
| Synthesis of compound <b>5</b> ..... | 9  |
| Spectroscopic Data.....              | 11 |
| Spectra of <b>1</b> .....            | 11 |
| Spectra of <b>2</b> .....            | 14 |

|                                                              |    |
|--------------------------------------------------------------|----|
| Spectra of <b>3</b> .....                                    | 18 |
| Spectra of <b>4</b> .....                                    | 22 |
| Spectra of <b>5</b> .....                                    | 26 |
| Lewis acid catalysis .....                                   | 29 |
| a) Hydrodefluorination of 1-fluoroadamantane .....           | 29 |
| b) Friedel-Crafts arylation.....                             | 32 |
| c) Friedel-Crafts-Dimerization of 1,1-diphenylethylene ..... | 34 |
| d) Hydrosilylation of 2-norbornene .....                     | 36 |
| X-ray Crystallographic Data .....                            | 38 |
| Computational Details.....                                   | 43 |
| FIA and HIA calculation .....                                | 45 |
| Reference.....                                               | 48 |
| Cartesian Coordinates of the Optimized Geometries .....      | 50 |

## General Considerations

All experiments were carried out under inert gas atmosphere by using Schlenk-type glassware or in an Ar-filled glove box. Toluene, n-hexane and Deuterated solvents ( $C_6D_6$ ) were dried with sodium/potassium alloy prior to use and stored with 3Å molecular sieves.  $C_6H_5F$  was dried by refluxing with  $CaH_2$  and stored with 3Å molecular sieves. 1,2-dichlorobenzene ( $C_6H_4Cl_2$ ) was stored with 3Å molecular sieves. All solvents were stored under argon atmosphere.

$[HAl(C_6F_5)_2]_2$ <sup>[S1]</sup>,  $iPr-NHC$ <sup>[S2]</sup>(IPr) and  $Cp^*Al$ <sup>[S3]</sup> were synthesized according to the literature methods. NMR spectra were recorded on a Bruker Advance 500 ( $^1H$ : 500 MHz,  $^{13}C$ : 125 MHz,  $^{19}F$ : 470 MHz,  $^{11}B$ : 160 MHz) spectrometer at 298 K. Data are presented as follows: chemical shift, multiplicity (s = singlet, d = doublet, t = triplet, q = quartet, m = multiplet, br = broad), integration, coupling constant in hertz (Hz).

HRMS were recorded on a Thermo Scientific TM Q-Exactive Plus<sup>TM</sup> mass spectrometer. Single-crystal X-ray diffraction data were collected on a Bruker D8 QUEST diffractometer using Cu (60W, Diamond,  $\mu K\alpha = 12.894 \text{ mm}^{-1}$ ) micro-focus X-ray sources. Using Olex2<sup>[S4]</sup>, the structure was solved with the XT<sup>[S5]</sup> structure solution program using Intrinsic Phasing and refined with the XL<sup>[S6]</sup> refinement package using Least Squares minimization.

## Experimental Procedures

### Synthesis of compound 1

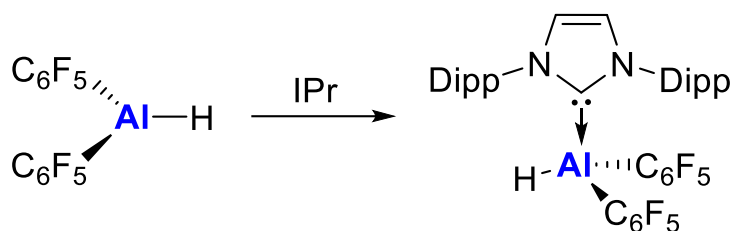

**Scheme S1-1: Synthesis of 1**

In the glovebox, a toluene solution (5 mL) of  $[\text{HAl}(\text{C}_6\text{F}_5)_2]_2$  (362 mg, 1 mmol) was added dropwise into a toluene solution (5 mL) of IPr (388 mg, 1 mmol) at room temperature and the reaction mixture was stirred for 30 min. After removing the solvent under vacuum, the resulting solid was washed with hexane ( $3 \times 2$  mL). After evaporation to dryness, **1** was obtained as white solids (675 mg, 90% yield). NMR data of compound **1** were obtained from a solution of the isolated colorless solid in toluene. **Single crystals** (colorless) suitable for X-ray analysis were obtained from the toluene solution at room temperature for 2 hours.

$^1\text{H}$  NMR (500 MHz,  $\text{C}_6\text{D}_6$ , ppm):  $\delta$  0.84 (d,  $J=6.8$  Hz, 12H,  $\text{CH}(\text{CH}_3)_2$ ), 1.20 (d,  $J=6.8$  Hz, 12H,  $\text{CH}(\text{CH}_3)_2$ ), 2.74 (sept,  $J=6.8$  Hz, 4H,  $\text{CH}(\text{CH}_3)_2$ ), 4.35 (s, 1H,  $\text{AlH}$ ), 6.48 (s, 4H, N-CH-), 6.86 (d,  $J=7.8$  Hz, 4H, Ar-H), 7.06 (t,  $J=7.8$  Hz, 2H, Ar-H).

$^{13}\text{C}\{^1\text{H}\}$  NMR (125 MHz,  $\text{C}_6\text{D}_6$ , ppm): IPr:  $\delta$  21.6, 26.4 ( $\text{CH}(\text{CH}_3)_2$ ), 28.9 ( $\text{CH}(\text{CH}_3)_2$ ), 124.1 (ArC), 125.6 (ArC), 128.3 (ArC), 131.2 (ArC), 133.7 (-N-CH-), 145.7 (NCN);  $\text{Al}(\text{C}_6\text{F}_5)_2$ :  $\delta$  137.8-135.9 (m,  $m\text{-C}_6\text{F}_5$ ), 142.0-140 (m,  $p\text{-C}_6\text{F}_5$ ), 150.9-148.9 (m,  $o\text{-C}_6\text{F}_5$ ).

$^{19}\text{F}\{^1\text{H}\}$  NMR (470 MHz,  $\text{C}_6\text{D}_6$ , ppm):  $\delta$  -118.4 (m, *o*- $\text{C}_6\text{F}_5$ ), -155.8 (tm, *p*- $\text{C}_6\text{F}_5$ ), -162.6 (m, *m*- $\text{C}_6\text{F}_5$ ).

HRMS(m/z):  $[\text{M}]^-$  calcd. for  $\text{C}_{39}\text{H}_{37}\text{AlF}_{10}\text{N}_2^-$ , 750.2617; found: 750.2588.

FT-IR (solid,  $\text{cm}^{-1}$ ): 2962.83, 1831.39(Al-H), 1638.04, 1508.39, 1437.32, 1054.24, 953.60, 646.46.

### Synthesis of compound 2

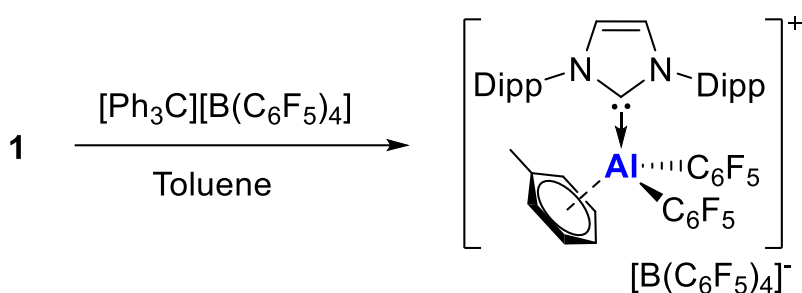

### Scheme S1-2: Synthesis of 2

In the glovebox, a toluene solution (5 mL) of  $[\text{Ph}_3\text{C}][\text{B}(\text{C}_6\text{F}_5)_4]$  (461 mg, 0.5 mmol) was added dropwise into a toluene solution (5 mL) of **1** (375 mg, 0.5 mmol), and the reaction mixture was stirred at room temperature for 1 h. *n*-Hexane (15 mL) was slowly added into the solution while stirring. The precipitate was collected and washed with *n*-Hexane ( $3 \times 2.0$  mL). After drying under vacuum, white solids of **2** (684 mg, 90% yield) were obtained.

NMR data of compound **2** were obtained from a solution of the isolated colorless solid in a mixed solvent of  $\text{C}_6\text{D}_6$  and 1,2-dichlorobenzene. **Single crystals** (colorless) suitable for X-ray analysis were obtained by storing a toluene solution of **2** at  $-30$  °C for 2 hours.

$^1\text{H}$  NMR (500 MHz,  $\text{C}_6\text{D}_6$ +1,2-dichlorobenzene, ppm):  $\delta$  0.87 (d,  $J=6.7$  Hz, 12H,

CH(CH<sub>3</sub>)<sub>2</sub>), 0.98 (d, *J*=6.7 Hz, 12H, CH(CH<sub>3</sub>)<sub>2</sub>), 2.12 (s, 3H, PhCH<sub>3</sub>), 2.48 (sept, *J*=6.7 Hz, 4H, CH(CH<sub>3</sub>)<sub>2</sub>), (6.5-7.11 were overlap with 1,2-dichlorobenzene).

<sup>13</sup>C{<sup>1</sup>H} NMR (125 MHz, C<sub>6</sub>D<sub>6</sub>+1,2-dichlorobenzene, ppm): IPr: δ 21.3, 26.6 (CH(CH<sub>3</sub>)<sub>2</sub>), 29.2 (CH(CH<sub>3</sub>)<sub>2</sub>), 125.4 (ArC), 127.6 (ArC), 128.5 (ArC), 130.4 (ArC), 133.4 (-N-CH-), 146.0 (NCN); Tol: δ 21.5 (C<sub>6</sub>H<sub>5</sub>-CH<sub>3</sub>); Al(C<sub>6</sub>F<sub>5</sub>)<sub>2</sub> and [B(C<sub>6</sub>F<sub>5</sub>)<sub>4</sub>]<sup>-</sup> not listed.

<sup>11</sup>B{<sup>1</sup>H} NMR (160 MHz, C<sub>6</sub>D<sub>6</sub>+1,2-dichlorobenzene, ppm): δ -17.3 [B(C<sub>6</sub>F<sub>5</sub>)<sub>4</sub>]<sup>-</sup>.

<sup>19</sup>F{<sup>1</sup>H} NMR (470 MHz, C<sub>6</sub>D<sub>6</sub>+1,2-dichlorobenzene, ppm): Al(C<sub>6</sub>F<sub>5</sub>)<sub>2</sub>: δ -119.5 (m, *o*-C<sub>6</sub>F<sub>5</sub>), -146.8 (tm, *p*-C<sub>6</sub>F<sub>5</sub>), -159.6 (m, *m*-C<sub>6</sub>F<sub>5</sub>); [B(C<sub>6</sub>F<sub>5</sub>)<sub>4</sub>]<sup>-</sup>: δ -132.8 (m, *o*-C<sub>6</sub>F<sub>5</sub>), -163.5 (t, *p*-C<sub>6</sub>F<sub>5</sub>), -167.5 (m, *m*-C<sub>6</sub>F<sub>5</sub>).

HRMS(*m/z*): [M]<sup>+</sup> calcd. for C<sub>46</sub>H<sub>44</sub>AlF<sub>10</sub>N<sub>2</sub><sup>+</sup>, 841.3155; found: 841.3157.

### Synthesis of compound 3

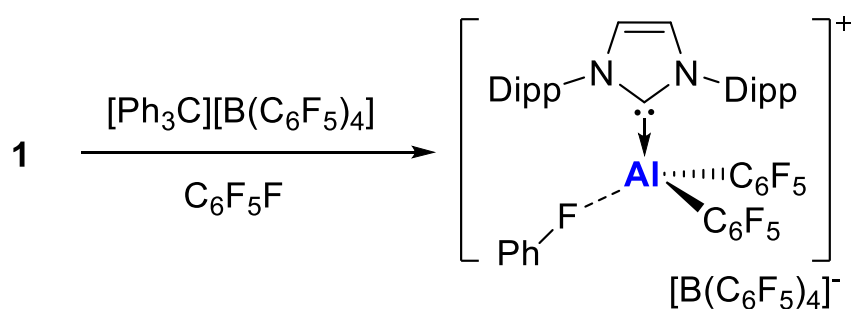

### Scheme S1-3: Synthesis of 3

In the glovebox, a fluorobenzene solution (5 mL) of [Ph<sub>3</sub>C][B(C<sub>6</sub>F<sub>5</sub>)<sub>4</sub>] (461 mg, 0.5 mmol) was added dropwise into a fluorobenzene solution (5 mL) of 1 (375 mg, 0.5 mmol) and the reaction mixture was stirred at room temperature for 1 h. n-Hexane (15 mL) was slowly added into the solution while stirring. The

precipitate was collected and washed with n-Hexane (3×2.0 mL). After drying under vacuum, white solids of **3** (685 mg, 90 % yield) were obtained.

**NMR** data of compound **3** were obtained from a solution of the isolated colorless solid in mixed solvents C<sub>6</sub>D<sub>6</sub> and fluorobenzene. **Single crystals** (colorless) suitable for X-ray analysis were obtained by storing a fluorobenzene solution of **3** at -30 °C for 1 hours.

**<sup>1</sup>H NMR** (500 MHz, C<sub>6</sub>D<sub>6</sub>+fluorobenzene, ppm): δ 0.90 (d, *J*=6.7 Hz, 12H, CH(CH<sub>3</sub>)<sub>2</sub>), 1.01(d, *J*=6.7 Hz, 12H, CH(CH<sub>3</sub>)<sub>2</sub>), 2.57 (sept, *J*=6.8 Hz, 4H, CH(CH<sub>3</sub>)<sub>2</sub>), (6.5-7.2 were overlap with fluorobenzene).

**<sup>13</sup>C{<sup>1</sup>H} NMR** (125 MHz, C<sub>6</sub>D<sub>6</sub>+fluorobenzene, ppm): IPr: δ 21.3, 26.1 (CH(CH<sub>3</sub>)<sub>2</sub>), 29.3 (CH(CH<sub>3</sub>)<sub>2</sub>), 125.1 (ArC), 128.5 (ArC), 128.7 (ArC), 131.6 (ArC), 132.9 (-N-CH-), 146.2 (NCN); fluorobenzene was overlap with fluorobenzene; Al(C<sub>6</sub>F<sub>5</sub>)<sub>2</sub> and [B(C<sub>6</sub>F<sub>5</sub>)<sub>4</sub>]<sup>-</sup> not listed.

**<sup>11</sup>B{<sup>1</sup>H} NMR** (160 MHz, C<sub>6</sub>D<sub>6</sub>+fluorobenzene, ppm): δ -15.9 [B(C<sub>6</sub>F<sub>5</sub>)<sub>4</sub>]<sup>-</sup>.

**<sup>19</sup>F{<sup>1</sup>H} NMR** (470 MHz, C<sub>6</sub>D<sub>6</sub>+fluorobenzene, ppm): Al(C<sub>6</sub>F<sub>5</sub>)<sub>2</sub>: δ -119.6 (m, *o*-C<sub>6</sub>F<sub>5</sub>), -146.0 (tm, , *p*-C<sub>6</sub>F<sub>5</sub>), -158.8 (m, *m*-C<sub>6</sub>F<sub>5</sub>); [B(C<sub>6</sub>F<sub>5</sub>)<sub>4</sub>]<sup>-</sup>: δ -132.1 (m, *o*-C<sub>6</sub>F<sub>5</sub>), -163.1 (t, *p*-C<sub>6</sub>F<sub>5</sub>), -166.9 (m, *m*-C<sub>6</sub>F<sub>5</sub>).

**HRMS**(m/z): [M]<sup>+</sup> calcd. for C<sub>45</sub>H<sub>41</sub>AlF<sub>11</sub>N<sub>2</sub><sup>+</sup>, 845.2904; found: 845.2857.

## Synthesis of compound 4

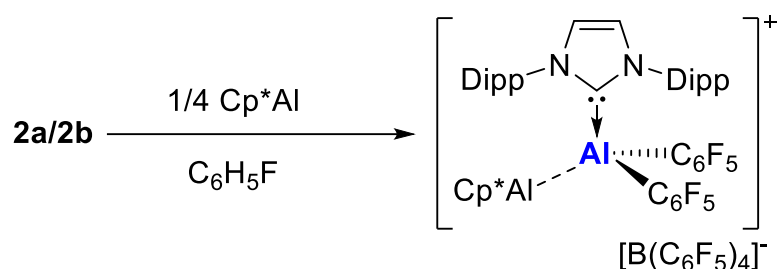

**Scheme S1-4: Synthesis of 4**

Compound **3** (608 mg, 0.4 mmol) and [Cp\*Al]<sub>4</sub> (65.2 mg, 0.1 mol) were dissolved in 5 mL of fluorobenzene. The resulting solution was stirred at room temperature for 6 hours. The solvent was evaporated under vacuum, resulting in the formation of pale-yellow solids. The residue was washed with n-hexane (3×2 mL), and the remaining material was dried under vacuum. White solids of **4** as pale-yellow solids (26.0 mg, 90 % yield) were obtained.

**NMR** data of compound **4** were obtained from a solution of the isolated colorless solid in a mixed solvent of C<sub>6</sub>D<sub>6</sub> and fluorobenzene. **Single crystals** (colorless) suitable for X-ray analysis were obtained by storing a mixed solvent of toluene and fluorobenzene of **4** at -30 °C for 5 hours.

**<sup>1</sup>H NMR** (500 MHz, C<sub>6</sub>D<sub>6</sub>+fluorobenzene, ppm): δ 0.85 (dd, *J*=6.7 Hz, 24H, CH(CH<sub>3</sub>)<sub>2</sub>), 1.42(s, (CH<sub>3</sub>)<sub>5</sub>Cp), 2.42 (sept, *J*=6.8 Hz, 4H, CH(CH<sub>3</sub>)<sub>2</sub>); (6.5-7.2 were overlap with fluorobenzene).

**<sup>13</sup>C{<sup>1</sup>H} NMR** (125 MHz, C<sub>6</sub>D<sub>6</sub>+fluorobenzene, ppm): IPr: δ 8.76 (CH<sub>3</sub>)<sub>5</sub>Cp), 21.9, 25.5 (CH(CH<sub>3</sub>)<sub>2</sub>), 28.7 (CH(CH<sub>3</sub>)<sub>2</sub>), 117.2 (ArC), 125.0 (ArC), 128.5 (ArC), 132.5 (ArC), 132.7 (-N-CH-), 146.0 (NCN); Al(C<sub>6</sub>F<sub>5</sub>)<sub>2</sub> and [B(C<sub>6</sub>F<sub>5</sub>)<sub>4</sub>]<sup>-</sup> not listed.



$^{11}\text{B}\{^1\text{H}\}$  NMR (160 MHz,  $\text{C}_6\text{D}_6$ +fluorobenzene, ppm):  $\delta$  -16.0 [ $\text{B}(\text{C}_6\text{F}_5)_4$ ] $^-$ .

$^{19}\text{F}\{^1\text{H}\}$  NMR (470 MHz,  $\text{C}_6\text{D}_6$ +fluorobenzene, ppm):  $\text{Al}(\text{C}_6\text{F}_5)_2$ :  $\delta$  -118.1 (m, *o*- $\text{C}_6\text{F}_5$ ), -150.4 (tm, *p*- $\text{C}_6\text{F}_5$ ), -160.3 (m, *m*- $\text{C}_6\text{F}_5$ ); [ $\text{B}(\text{C}_6\text{F}_5)_4$ ] $^-$ :  $\delta$  -131.8 (m, *o*- $\text{C}_6\text{F}_5$ ), -162.9 (t, *p*- $\text{C}_6\text{F}_5$ ), -166.7 (m, *m*- $\text{C}_6\text{F}_5$ ).

HRMS(m/z):  $[\text{M}]^+$  calcd. for  $\text{C}_{49}\text{H}_{51}\text{Al}_2\text{F}_{10}\text{N}_2^+$ , 911.3518; found: 911.3468.

### Synthesis of compound 5

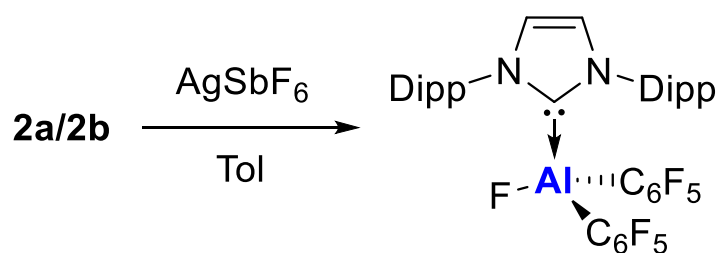

### Scheme S1-5: Synthesis of 5

Mixture of **2** (152.6 mg, 0.1 mmol) (or **3**) and  $\text{AgSbF}_6$  (34.3mg, 0.1mmol) were combined in toluene (5 mL). The mixture was stirred for 30 minutes yielding a turbid solution. the mixture was filtered off and vacuumed to give a white solid of **5** in 90% yield (69 mg).

**[Caution]** Extra caution should be exercised when handling  $\text{AgSbF}_6$ , due to the potential oxidizing properties of  $\text{Ag}^+$  ions.

NMR data of compound **5** were obtained from  $\text{C}_6\text{D}_6$ . **Single crystals** (colorless) suitable for X-ray analysis were obtained by storing a mixed solvent of toluene and n-hexane of **5** at  $-30\text{ }^\circ\text{C}$  for 2 hours.

$^1\text{H}$  NMR (500 MHz,  $\text{C}_6\text{D}_6$ , ppm):  $\delta$  0.85 (d,  $J=6.8$  Hz, 12H,  $\text{CH}(\text{CH}_3)_2$ ), 1.22 (d,  $J=6.8$  Hz, 12H,  $\text{CH}(\text{CH}_3)_2$ ), 2.76 (sept,  $J=6.8$  Hz, 4H,  $\text{CH}(\text{CH}_3)_2$ ), 6.46 (s, 2H,

-N-CH-), 6.87 (d,  $J=7.8$  Hz, 4H, Ar-*H*), 7.04 (t,  $J=7.8$  Hz, 2H, Ar-*H*).

$^{13}\text{C}\{^1\text{H}\}$  NMR (125 MHz,  $\text{C}_6\text{D}_6$ , ppm): IPr:  $\delta$  21.7, 26.5 ( $\text{CH}(\text{CH}_3)_2$ ), 29.0 ( $\text{CH}(\text{CH}_3)_2$ ), 124.0 (ArC), 125.7 (ArC), 128.3 (ArC), 131.3 (ArC), 133.4 (-N-CH-), 145.9 (NCN);  $\text{Al}(\text{C}_6\text{F}_5)_2$  not listed.

$^{19}\text{F}\{^1\text{H}\}$  NMR (470 MHz,  $\text{C}_6\text{D}_6$ , ppm):  $(\text{C}_6\text{F}_5)_2\text{AlF}$ :  $\delta$  -119.6 (m, *o*- $\text{C}_6\text{F}_5$ ), -154.7 (tm, *p*- $\text{C}_6\text{F}_5$ ), -162.2 (m, *m*- $\text{C}_6\text{F}_5$ ), 170.9 (s, Al-*F*);  $[\text{B}(\text{C}_6\text{F}_5)_4]^-$ : -131.8 (m, *o*- $\text{C}_6\text{F}_5$ ), -162.5 (t, *p*- $\text{C}_6\text{F}_5$ ), -166.3 (m, *m*- $\text{C}_6\text{F}_5$ ).

HRMS( $m/z$ ):  $[\text{M}]^-$  calcd. for  $\text{C}_{39}\text{H}_{36}\text{AlF}_{11}\text{N}_2^-$ , 768.2523; found: 768.2501.

# Spectroscopic Data

## Spectra of 1

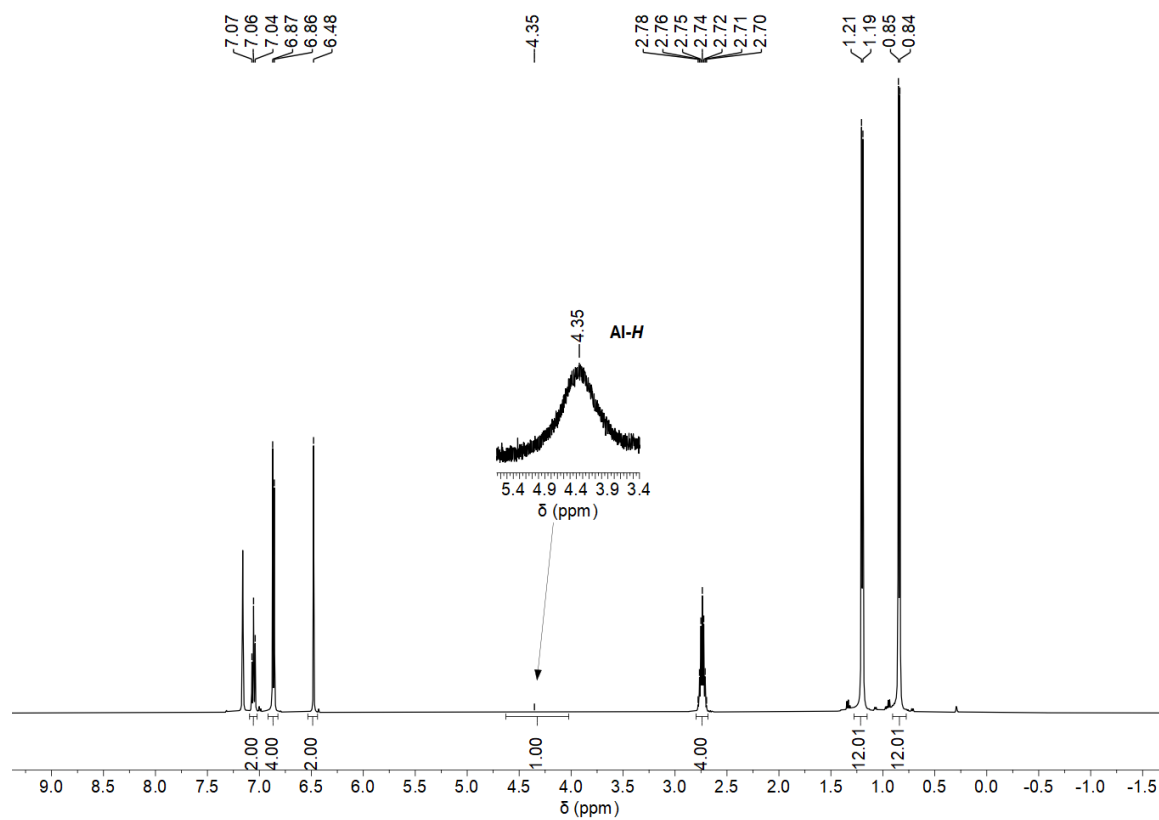

Figure S2-1.  $^1\text{H}$  NMR spectrum of **1** in  $\text{C}_6\text{D}_6$

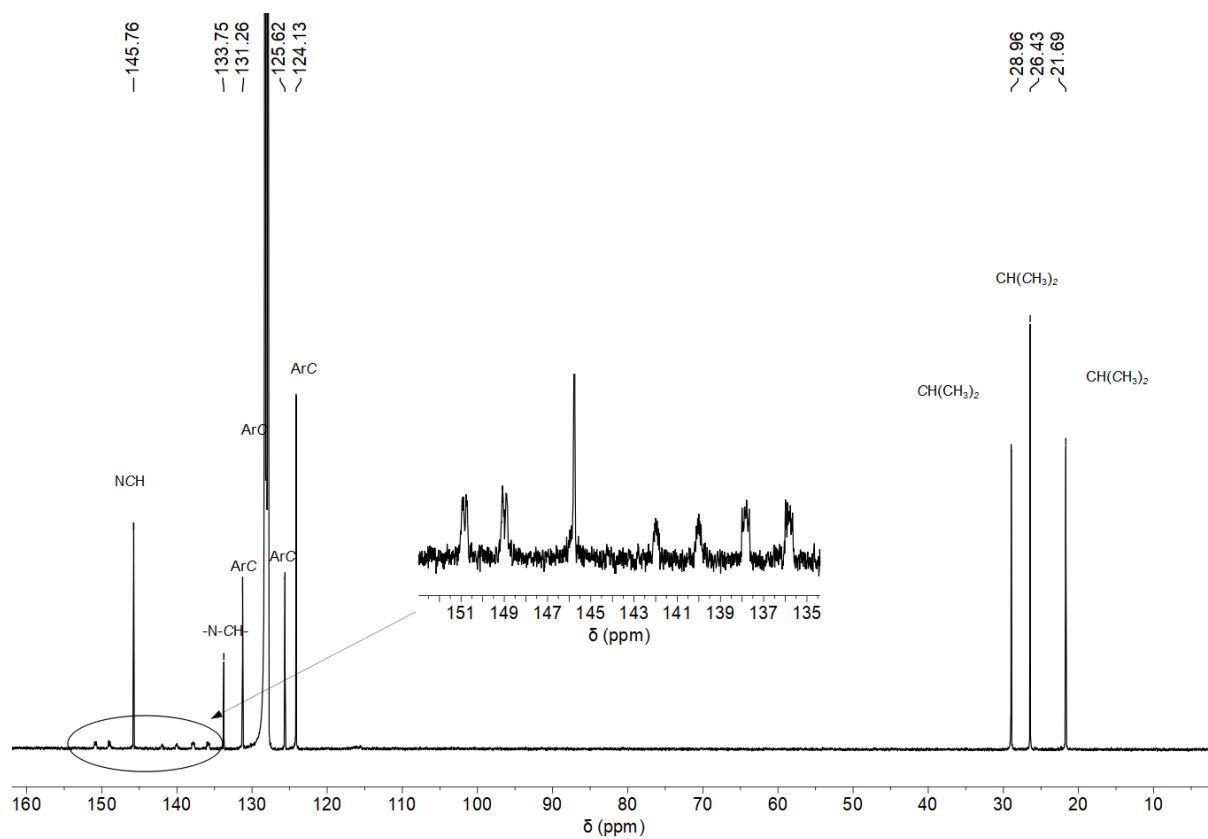

Figure S2-2.  $^{13}\text{C}$  NMR spectrum of **1** in  $\text{C}_6\text{D}_6$

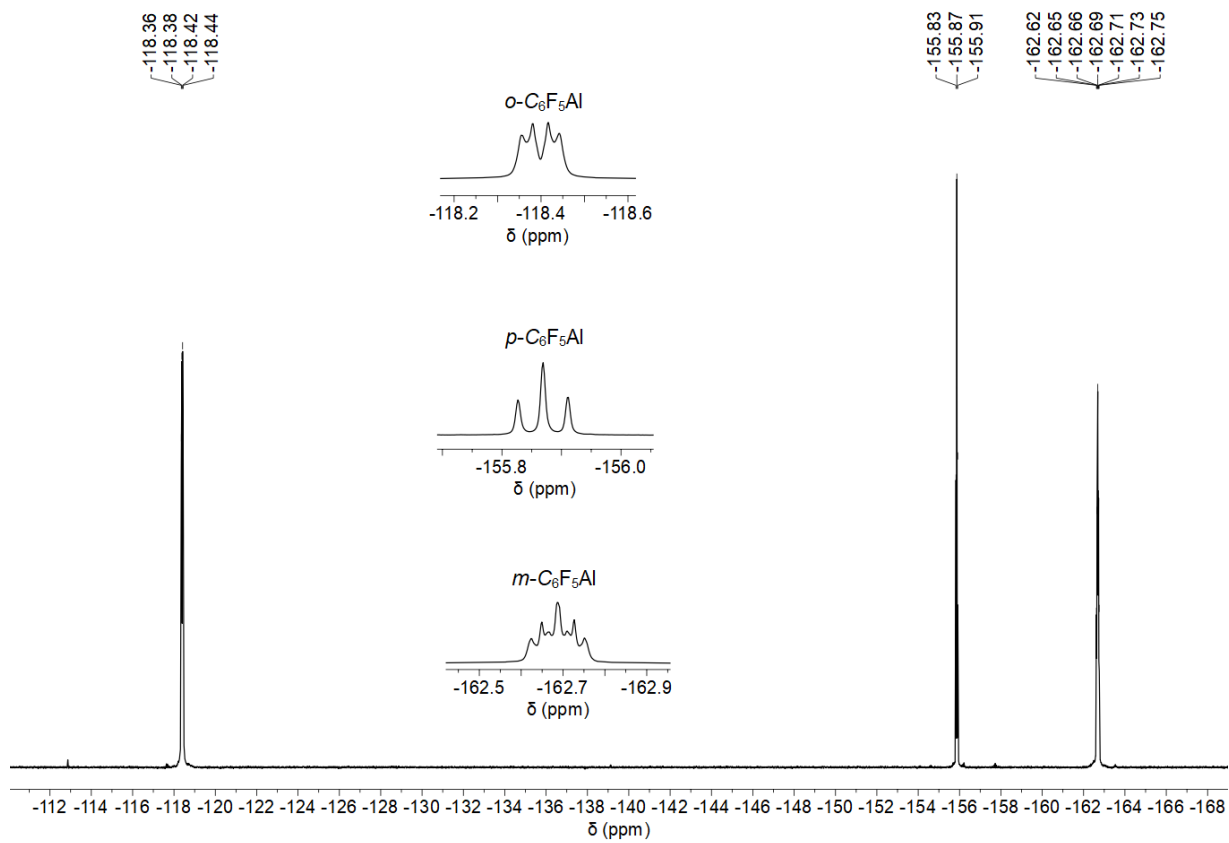

Figure S2-3.  $^{19}\text{F}$  NMR spectrum of **1** in  $\text{C}_6\text{D}_6$

## Spectra of 2

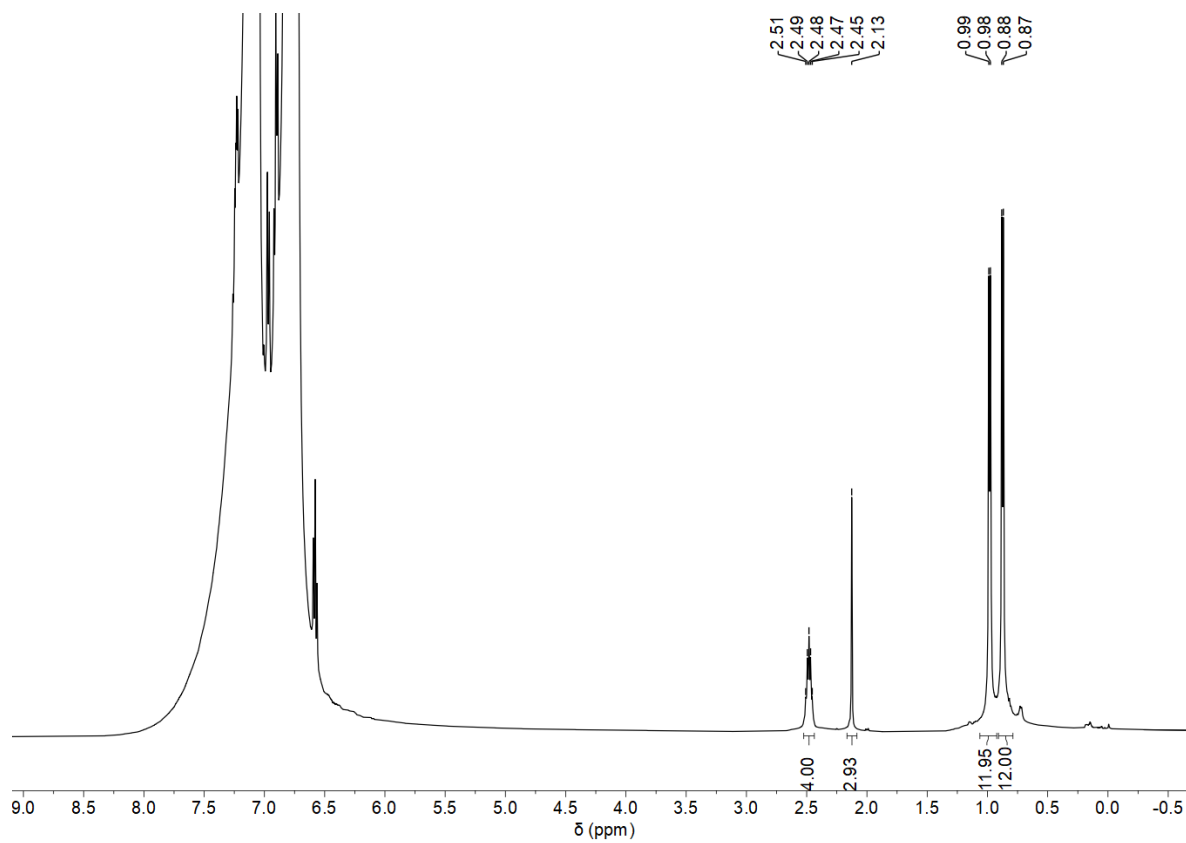

Figure S2-4.  $^1\text{H}$  NMR spectrum of **2** in  $\text{C}_6\text{D}_6$ +1,2-dichlorobenzene

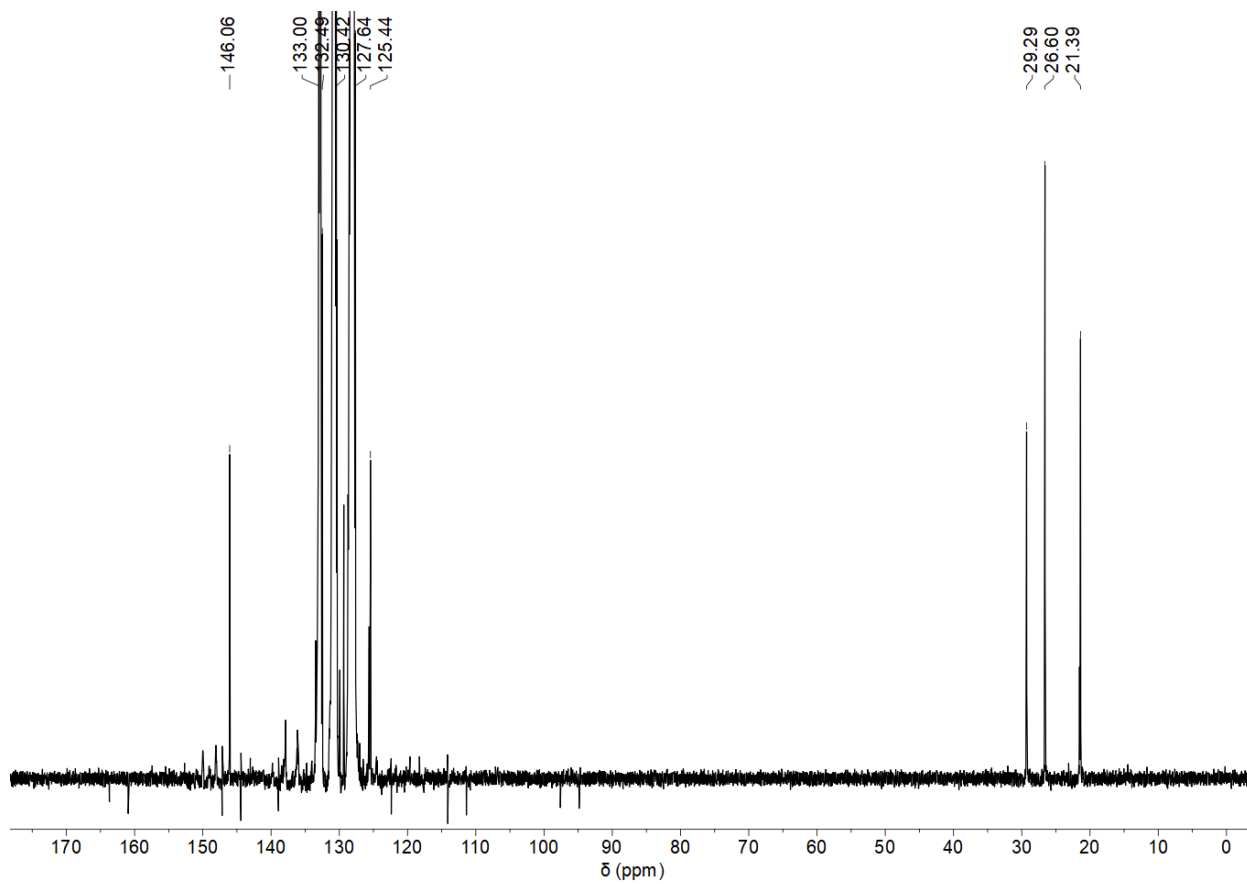

Figure S2-5.  $^{13}\text{C}$  NMR spectrum of **2** in  $\text{C}_6\text{D}_6$ +1,2-dichlorobenzene

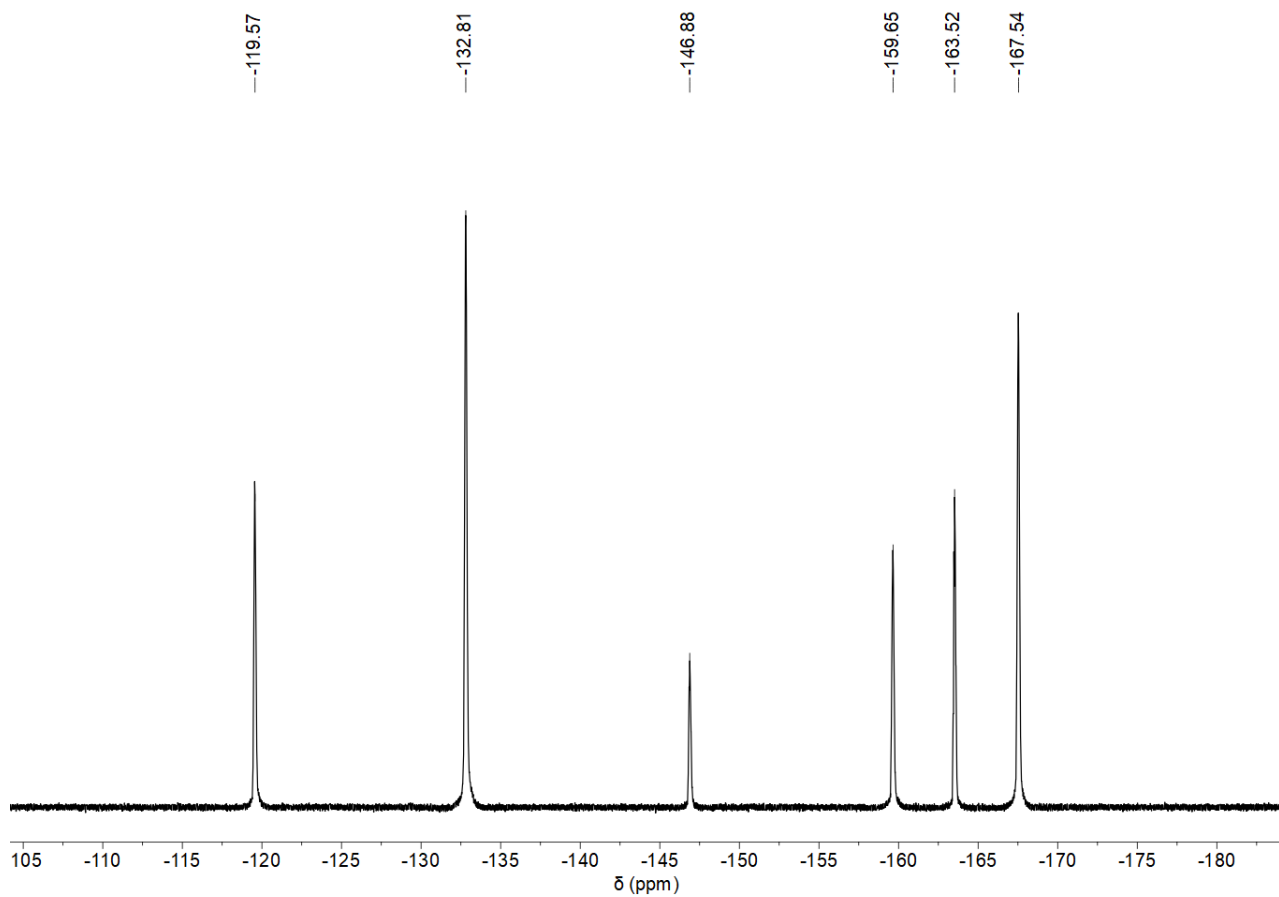

Figure S2-6.  $^{19}\text{F}$  NMR spectrum of **2** in  $\text{C}_6\text{D}_6$ +1,2-dichlorobenzene



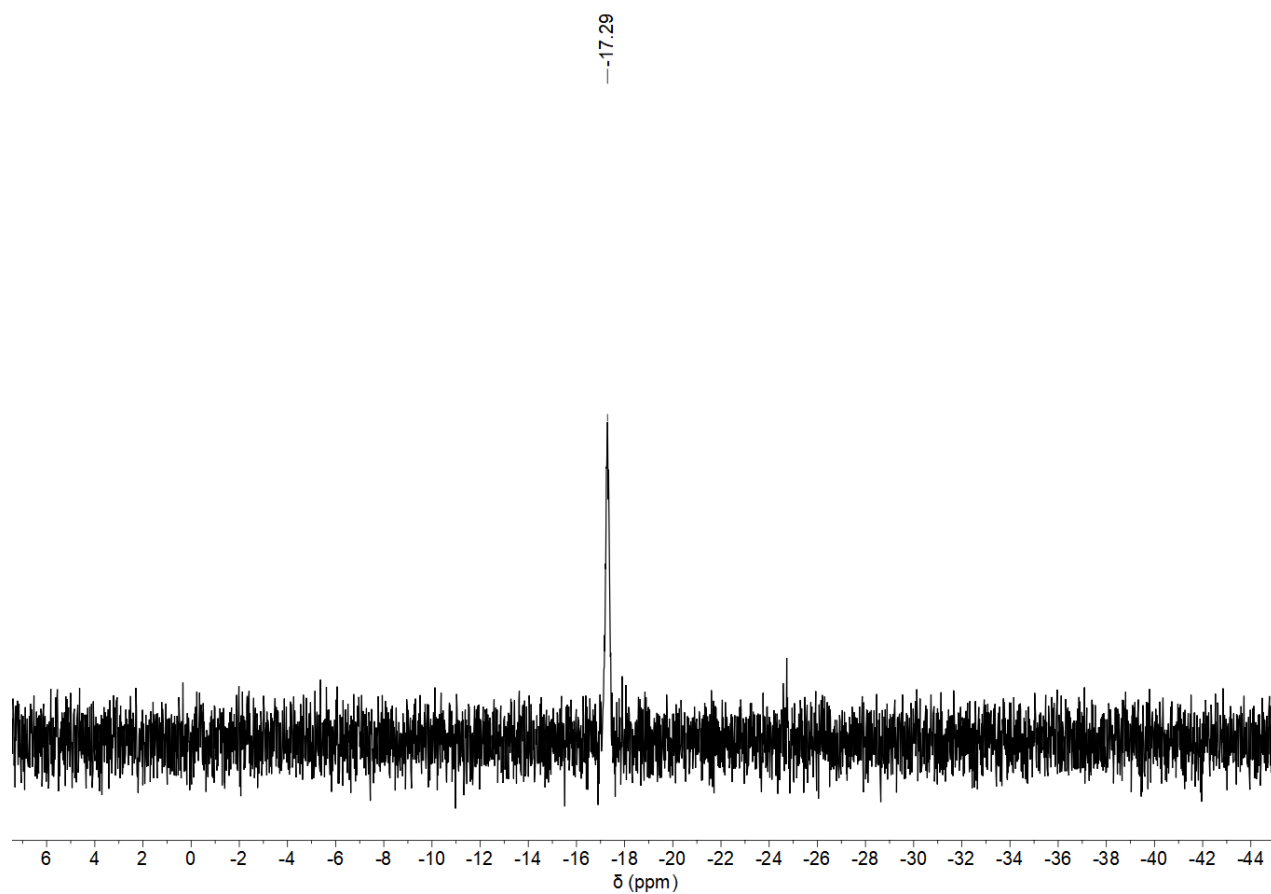

Figure S2-7.  $^{11}\text{B}$  NMR spectrum of **2** in  $\text{C}_6\text{D}_6$ +1,2-dichlorobenzene

### Spectra of **3**

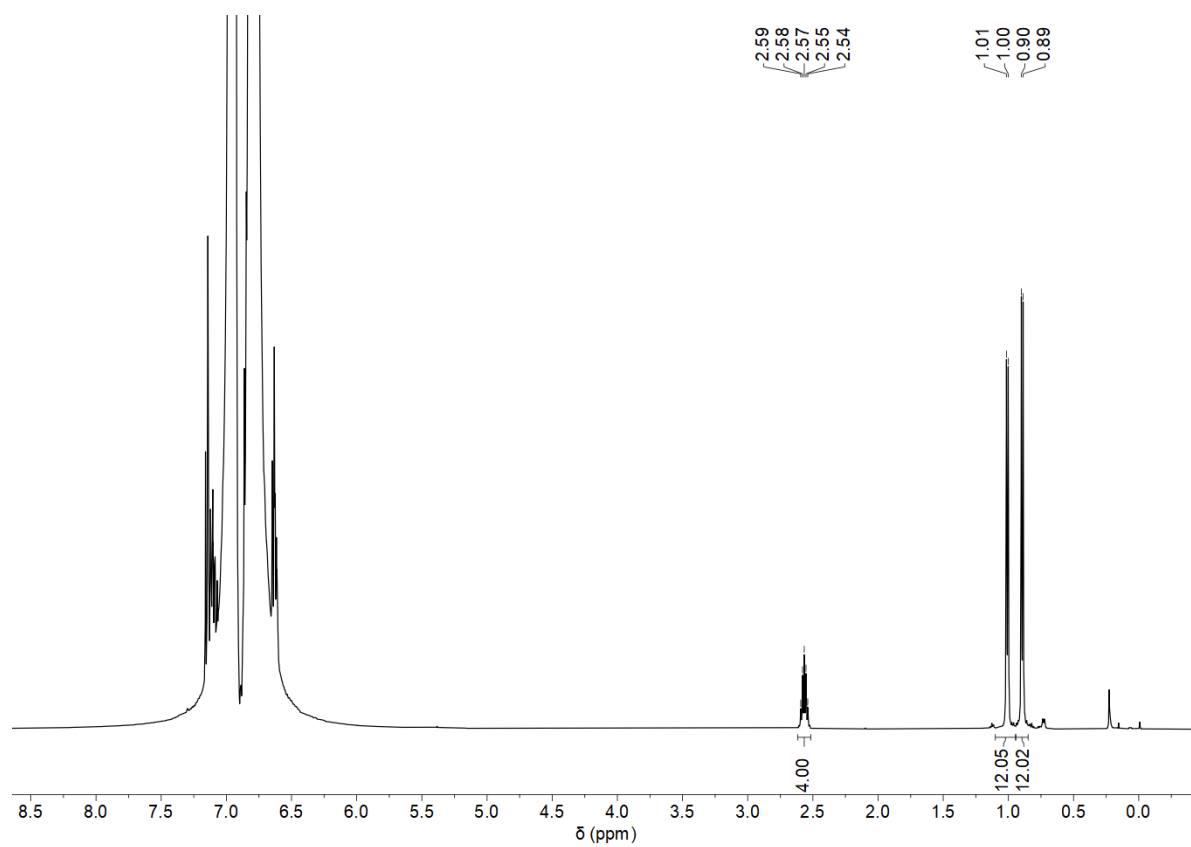

Figure S2-8.  $^1\text{H}$  NMR spectrum of **3** in  $\text{C}_6\text{D}_6$ +fluorobenzene

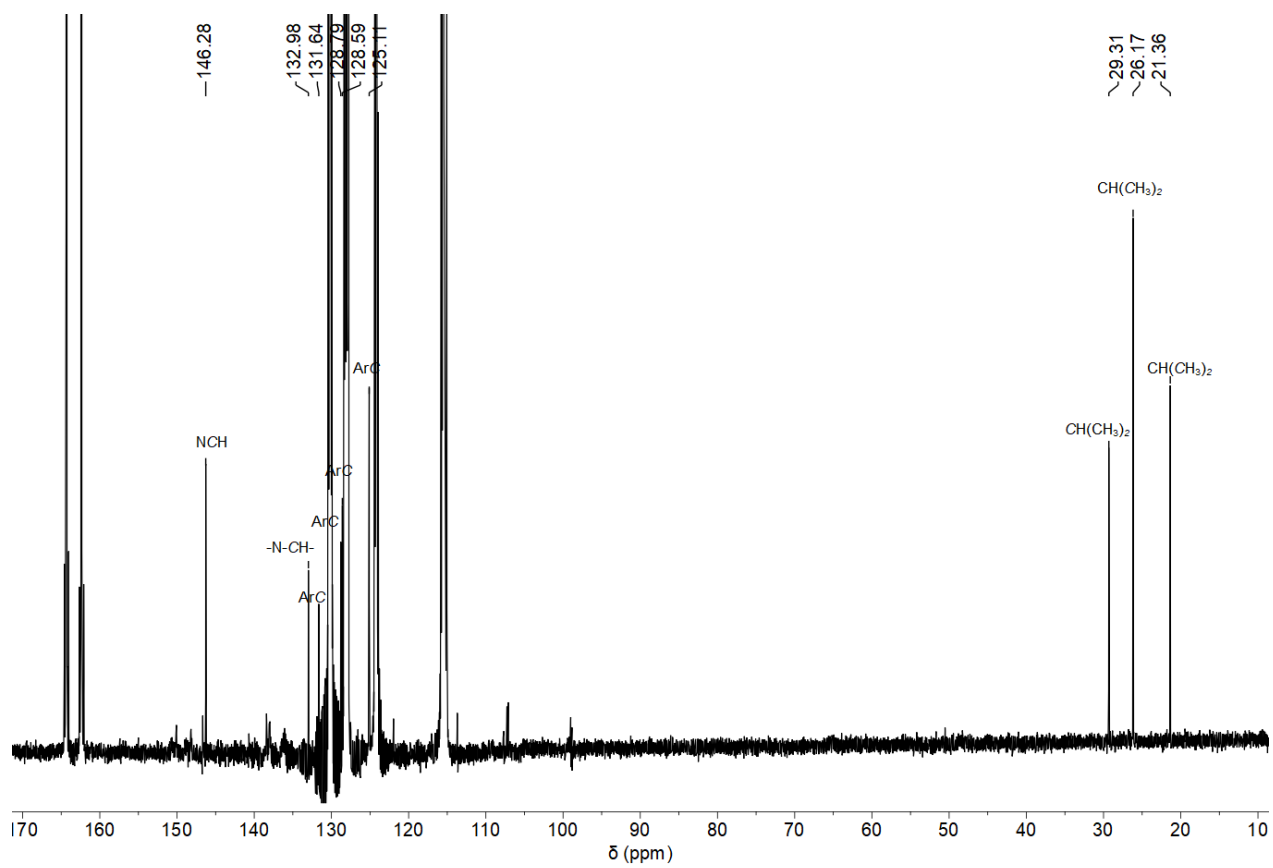

Figure S2-9.  $^{13}\text{C}$  NMR spectrum of **3** in  $\text{C}_6\text{D}_6$ +fluorobenzene

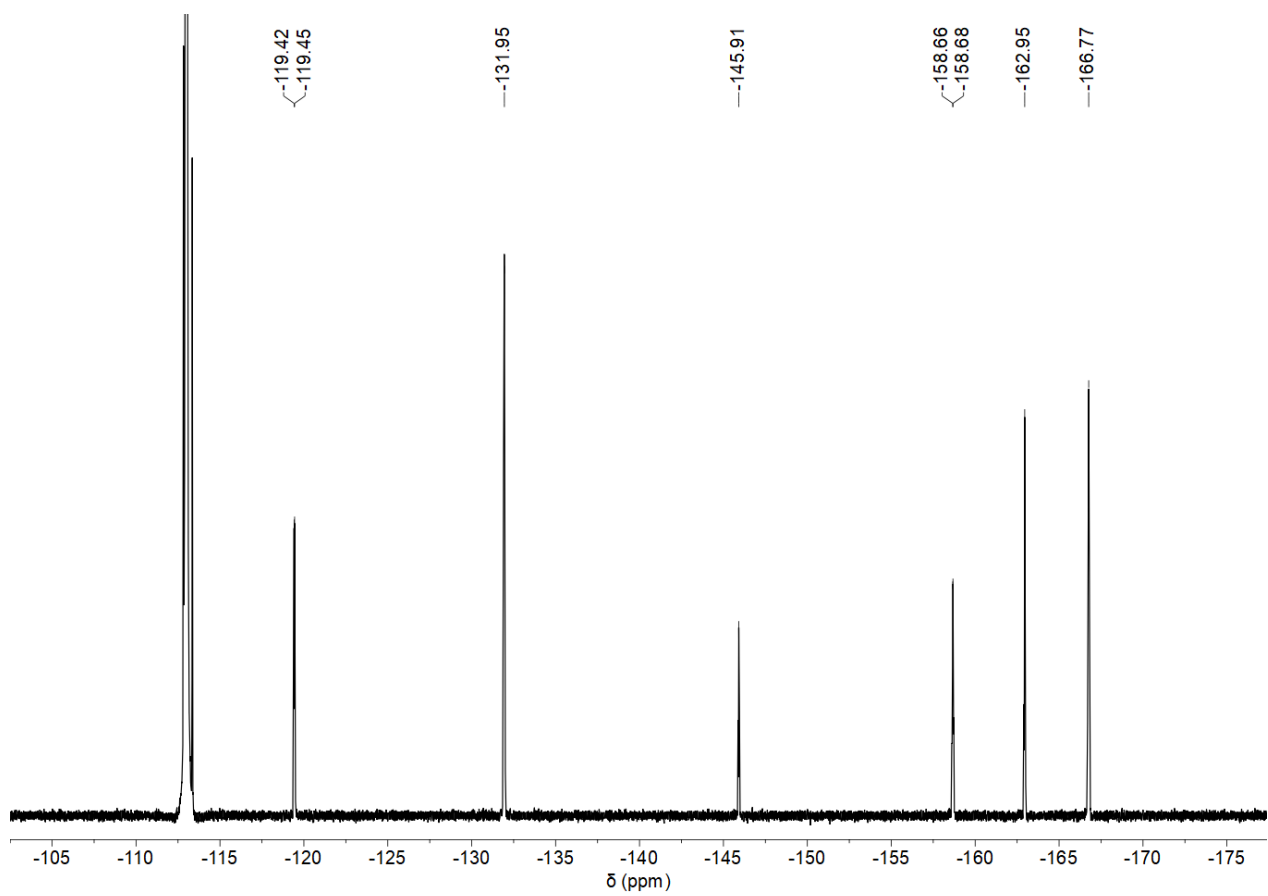

Figure S2-10.  $^{19}\text{F}$  NMR spectrum of **3** in  $\text{C}_6\text{D}_6$ +fluorobenzene

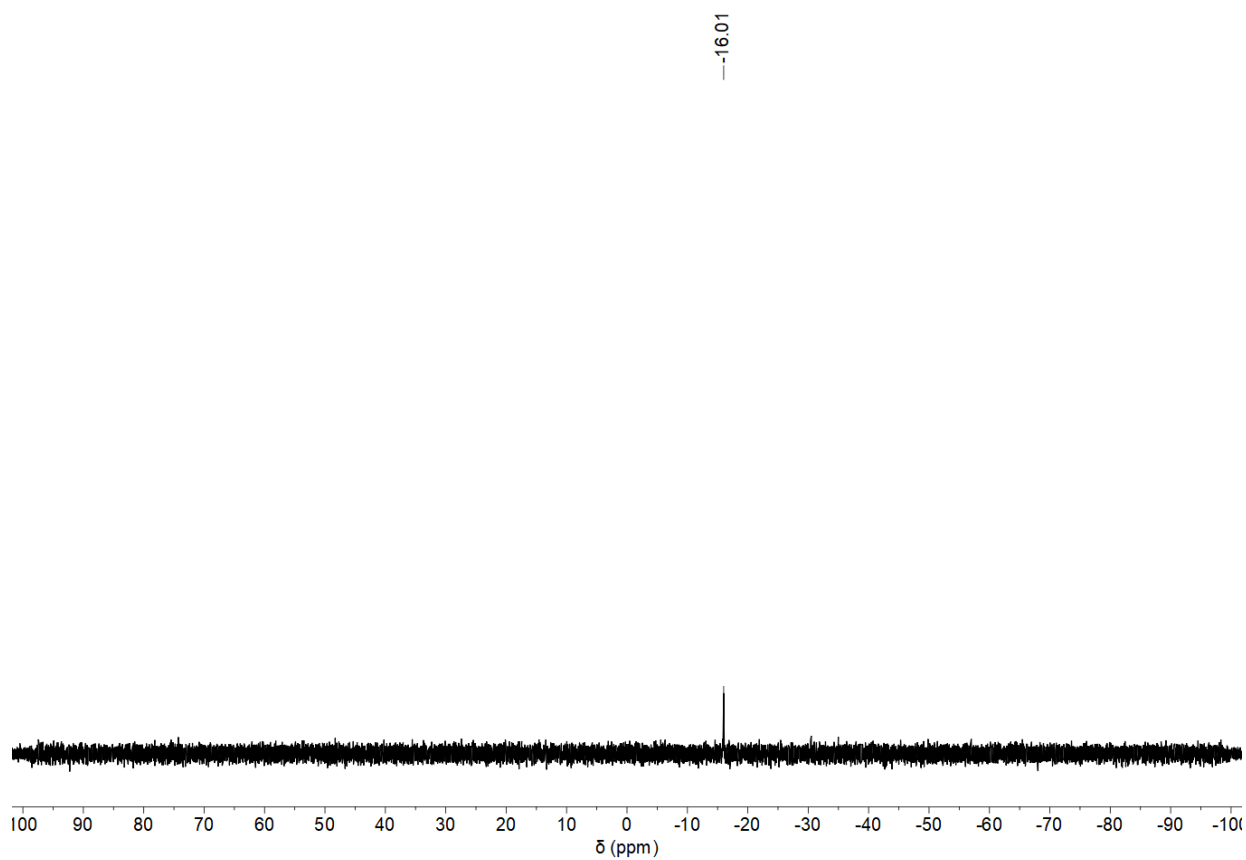

Figure S2-11.  $^{11}\text{B}$  NMR spectrum of **3** in  $\text{C}_6\text{D}_6$ +fluorobenzene

## Spectra of 4

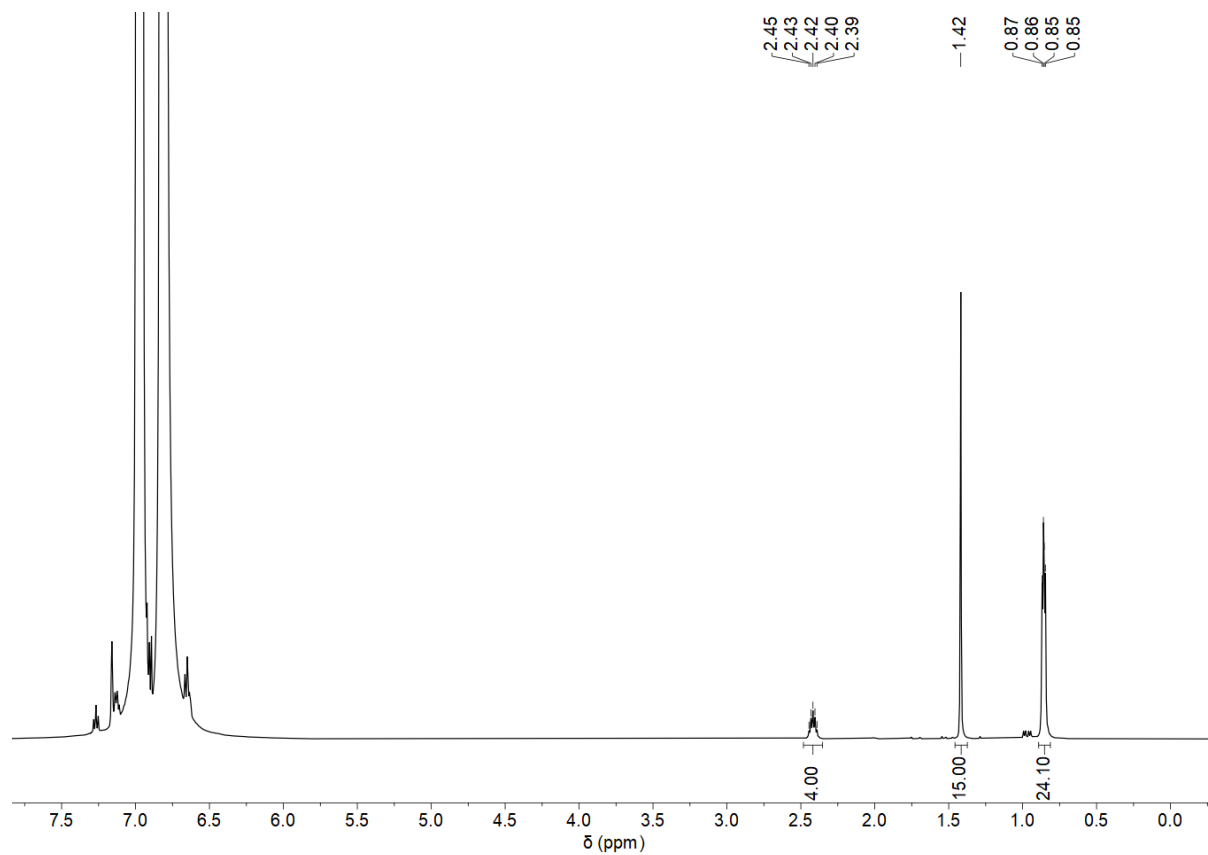

Figure S2-12  $^1\text{H}$  NMR spectrum of **4** in  $\text{C}_6\text{D}_6$ +fluorobenzene

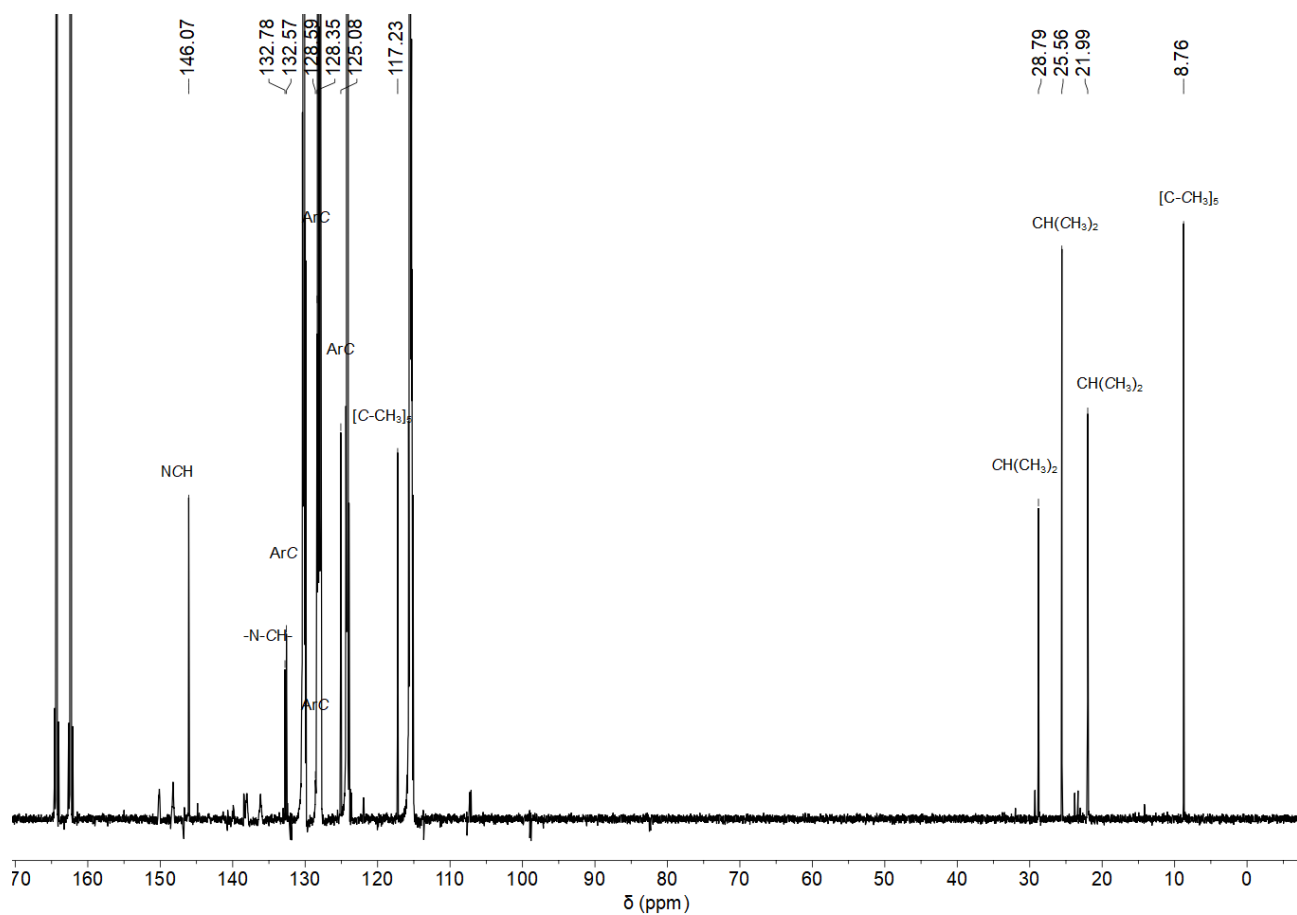

Figure S2-13  $^{13}\text{C}$  NMR spectrum of **4** in  $\text{C}_6\text{D}_6$ +fluorobenzene

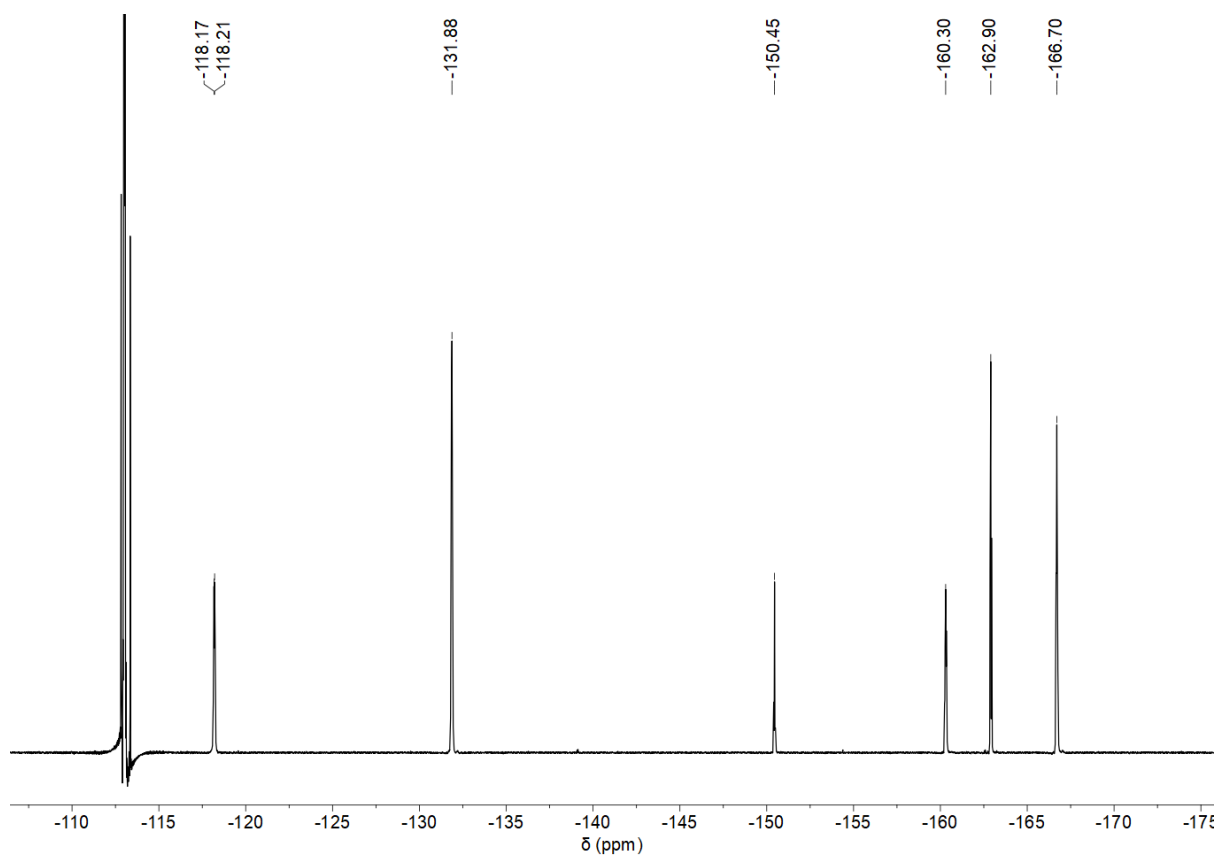

Figure S2-14  $^{19}\text{F}$  NMR spectrum of **4** in  $\text{C}_6\text{D}_6$ +fluorobenzene



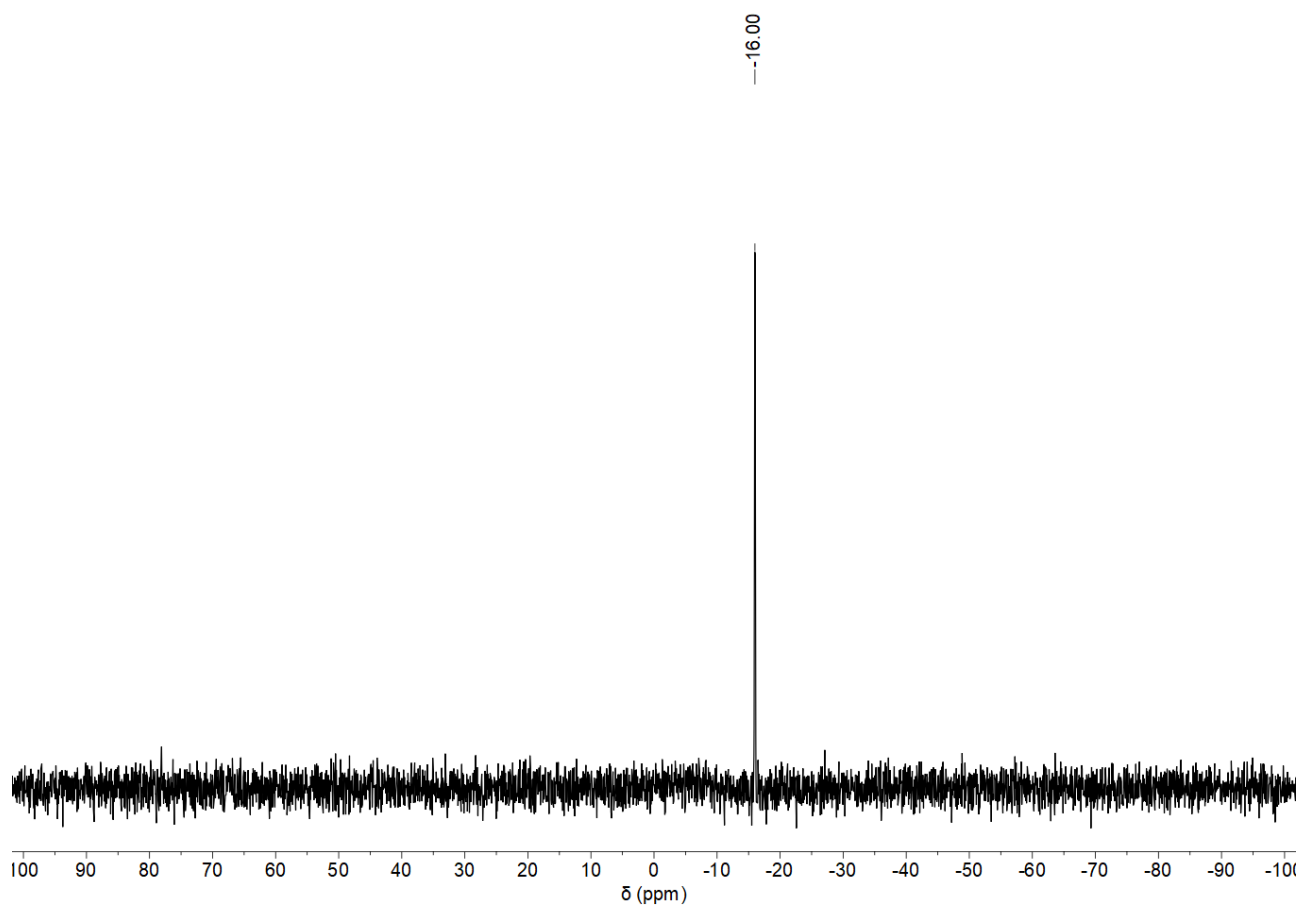

Figure S2-15  $^{11}\text{B}$  NMR spectrum of **4** in  $\text{C}_6\text{D}_6$ +fluorobenzene

## Spectra of 5

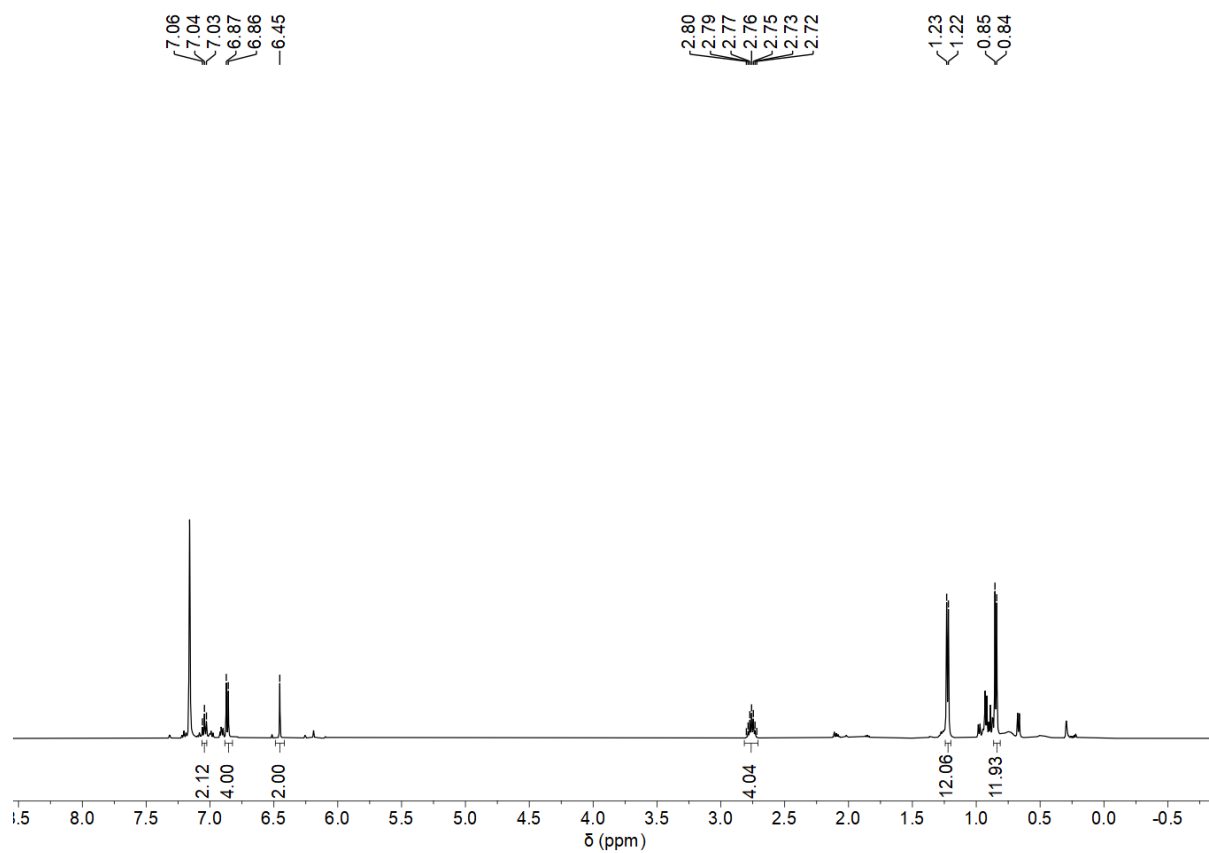

Figure S2-16  $^1\text{H}$  NMR spectrum of **5** in  $\text{C}_6\text{D}_6$

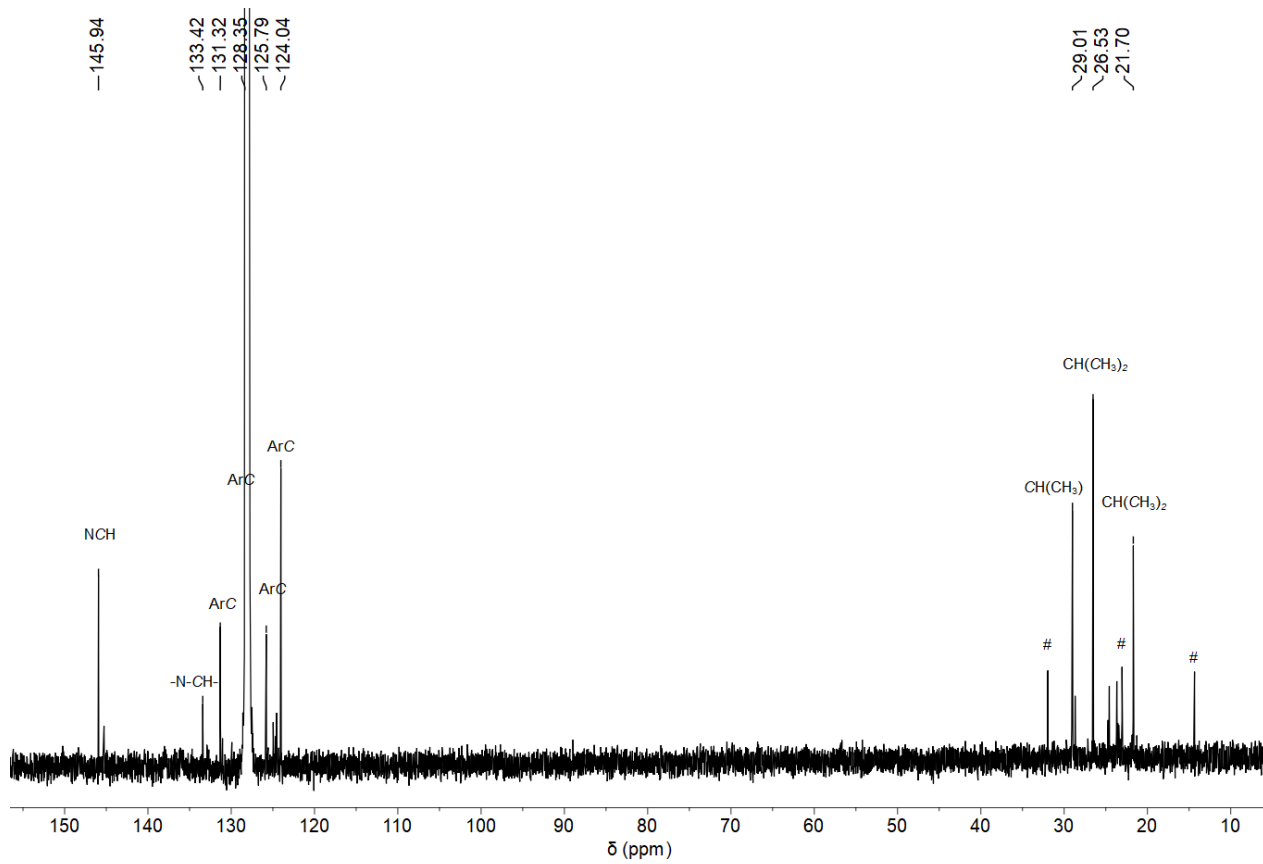

Figure S2-17  $^{13}\text{C}$  NMR spectrum of **5** in  $\text{C}_6\text{D}_6$  (#n-hexane)

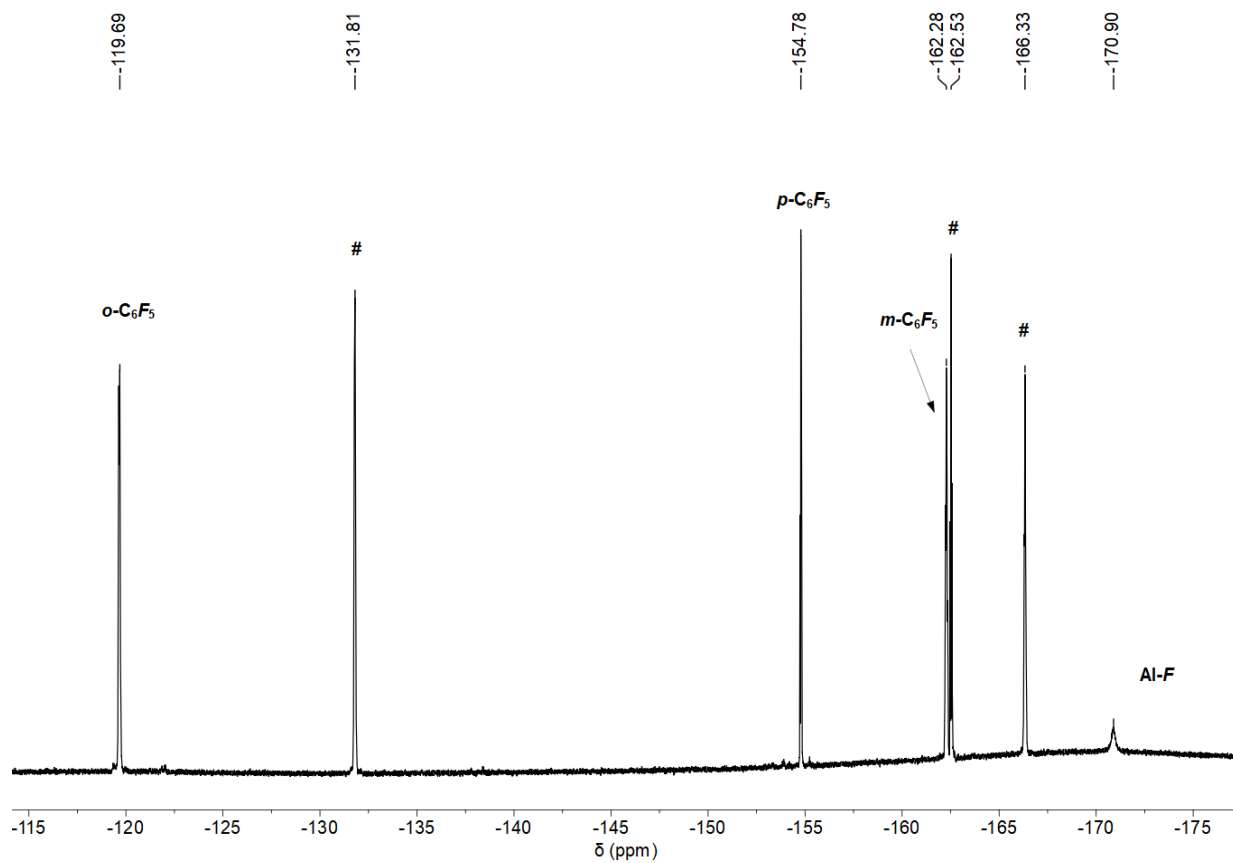

Figure S2-18  $^{19}\text{F}$  NMR spectrum of **5** in  $\text{C}_6\text{D}_6+1,2\text{-dichlorobenzene}$  ( $\#[\text{B}(\text{C}_6\text{F}_5)_4]^-$ )

## Lewis acid catalysis

### a) Hydrodefluorination of 1-fluoroadamantane

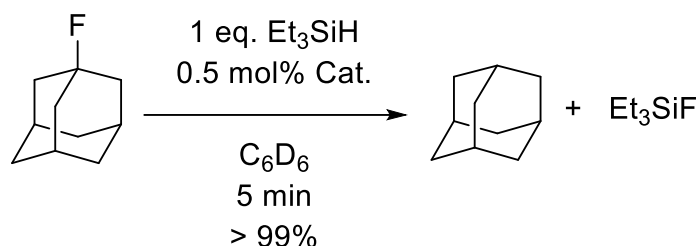

To a mixture of 1-fluoroadamantane (21.0 mg, 138  $\mu$ mol) and Et<sub>3</sub>SiH (22.0  $\mu$ L, 138  $\mu$ mol) in 0.5 ml C<sub>6</sub>D<sub>6</sub> were added **3** (1 mg, 0.69  $\mu$ mol) at PTFE-sealed J-Young NMR tube. The tube was immediately removed from the glovebox and monitored the conversion by <sup>1</sup>H and <sup>19</sup>F NMR spectroscopy. To monitor the reaction conversion, mesitylene (10.0  $\mu$ L, 71.9  $\mu$ mol) were additionally added as an internal standard. The yield of hydrodefluorination was 99%. Product identification corresponds with literature values for adamantane and separately synthesized Et<sub>3</sub>SiF.

<sup>1</sup>H NMR (500 MHz, C<sub>6</sub>D<sub>6</sub>, ppm): Adamantane<sup>[S7]</sup> (CAS: 281-23-2):  $\delta$  1.74 (br, 9H, R<sub>2</sub>CH<sub>2</sub>), 1.86 (br, 3H, R<sub>3</sub>CH); Et<sub>3</sub>SiF (CAS: 358-43-0):  $\delta$  0.51-0.57(m, 4.8 H, SiCH<sub>2</sub>CH<sub>3</sub>), 0.92 (t, *J*=8.0 Hz, 6.8 H, CH<sub>3</sub>).

<sup>19</sup>F NMR (471 MHz, C<sub>6</sub>D<sub>6</sub>, ppm):  $\delta$  -175.2 Et<sub>3</sub>SiF.

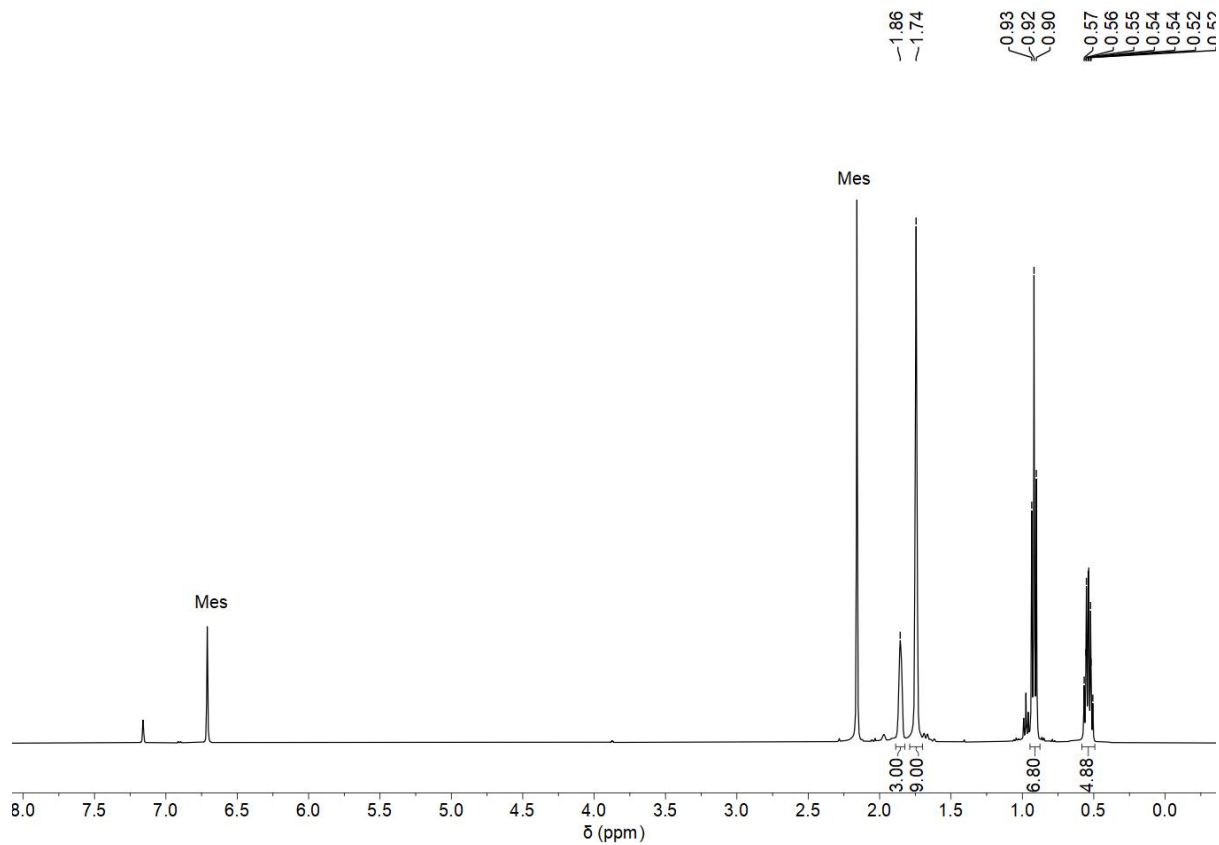

Figure S3-1. In-situ  $^1\text{H}$  NMR spectrum of the hydrodefluorination of 1-fluoroadamantane in  $\text{C}_6\text{D}_6$

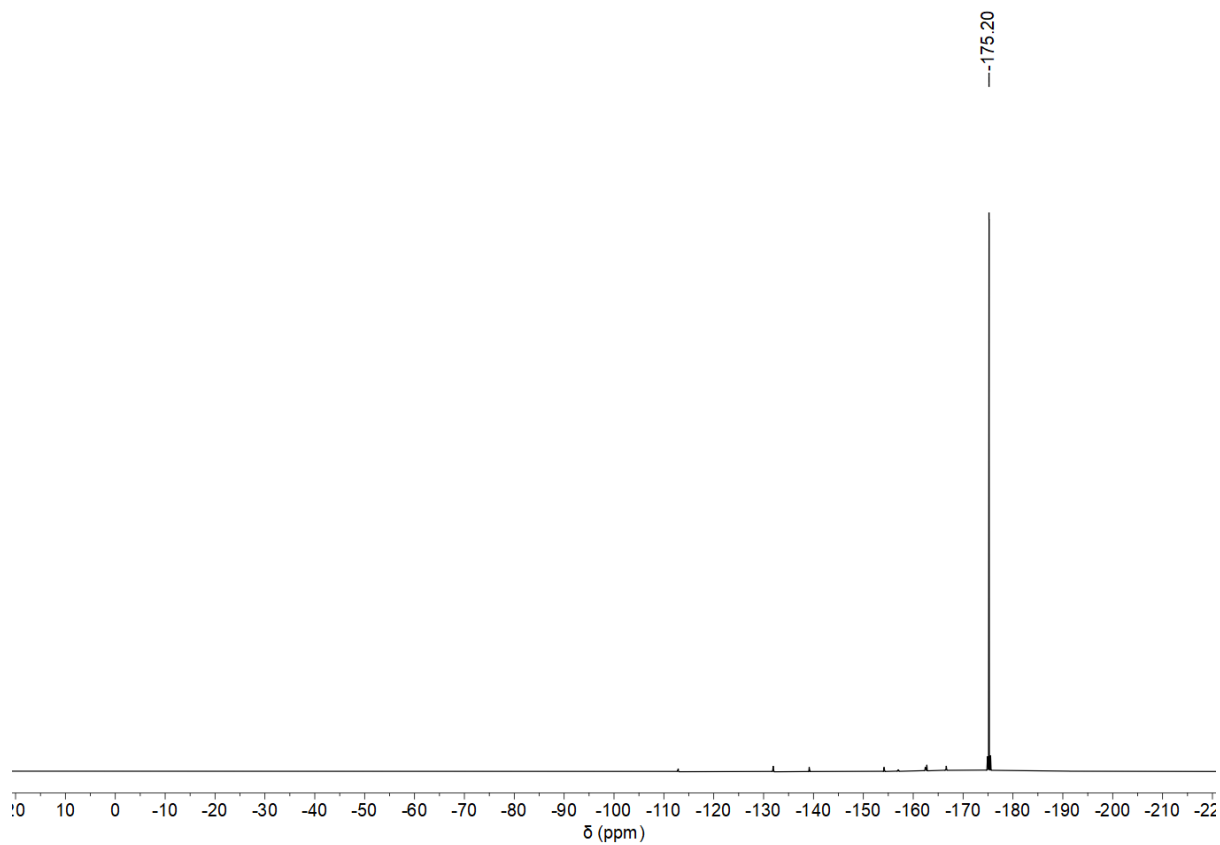

Figure S3-2. In-situ  $^{19}\text{F}$  NMR spectrum of the hydrodefluorination of 1-fluoroadamantane in  $\text{C}_6\text{D}_6$

## b) Friedel-Crafts arylation

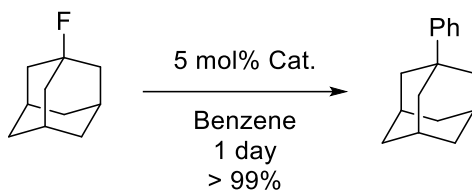

To a stirred benzene solution (3.0 mL) of 1-fluoroadamantane (154 mg, 1 mmol) were added **3** (75 mg, 0.05 mmol) dissolved in 5.0 mL benzene. The mixture was stirred and monitored by  $^{19}\text{F}$  NMR. After 24 h, the volatiles were removed under vacuum and the desired product was eluted by n-hexane to afford the corresponding coupled product. The yield of 1-phenyladamantane was 99% (32.6 mg). Product identification corresponds with literature values.

**1-phenyladamantane** <sup>[S8]</sup> (CAS: 780-68-7):

$^1\text{H}$  NMR (500 MHz,  $\text{C}_6\text{D}_6$ , ppm):  $\delta$  1.42-1.47(m, 6H), 1.58 (d,  $J = 3.0$  Hz, 6H), 1.72 (dt,  $J = 6.7, 3.4$  Hz, 3H), 6.88-6.93 (m, 1H, Ph-*H*), 7.01-7.04 (m, 2H, Ph-*H*), 7.06-7.08 (m, 2H, Ph-*H*).



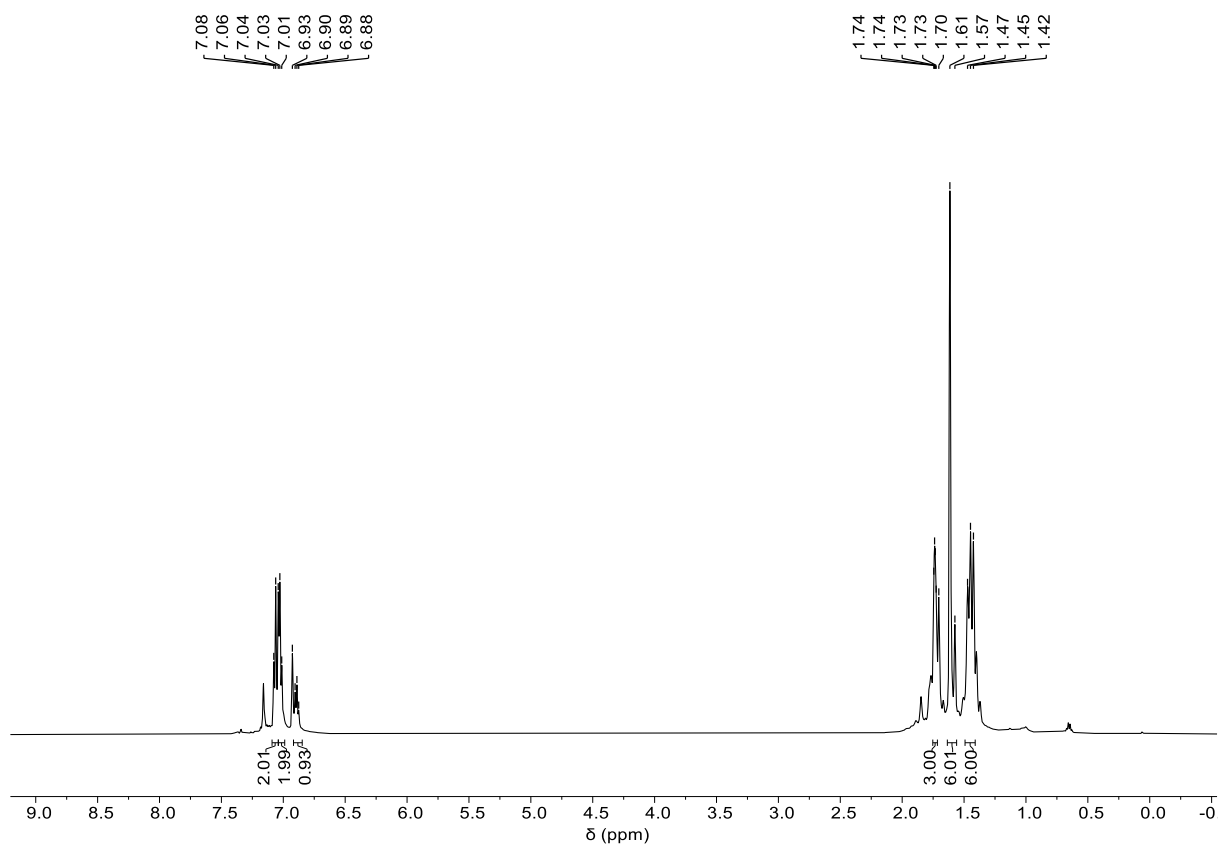

Figure S3-3.  $^1\text{H}$  NMR spectrum of 1-phenyladamantane in  $\text{C}_6\text{D}_6$

### c) Friedel-Crafts-Dimerization of 1,1-diphenylethylene

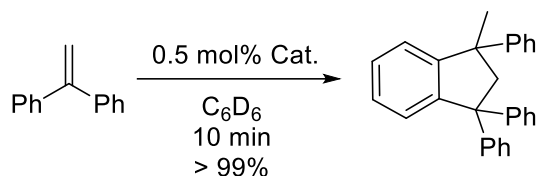

To a solution of 1,1-DPE (36.0 mg, 0.2mmol) in C<sub>6</sub>D<sub>6</sub> (1.0 mL) was added **3** (1.5 mg, 0.001 mmol), the mixture stirred for 1 min and then monitored by <sup>1</sup>H NMR. After completion of the reaction was confirmed, the volatiles were removed under vacuum and the desired product was eluted by n-hexane to afford a colorless oil. The yield of 1-methyl-1,3,3-triphenyl-2,3-dihydro-1H-indene was 99% (36 mg). Product identification corresponds with literature values.

**1-Methyl-1,3,3-triphenyl-2,3-dihydro-1H-indene**<sup>[S9]</sup> (CAS: 84803-40-7):

<sup>1</sup>H NMR (500 MHz, C<sub>6</sub>D<sub>6</sub>, ppm): δ 1.48 (s, 3H), 3.01 (d, *J*=13.6 Hz, 1H), 3.42(d, *J*=13.6 Hz, 1H), 7.21-6.89 (m, 20H).

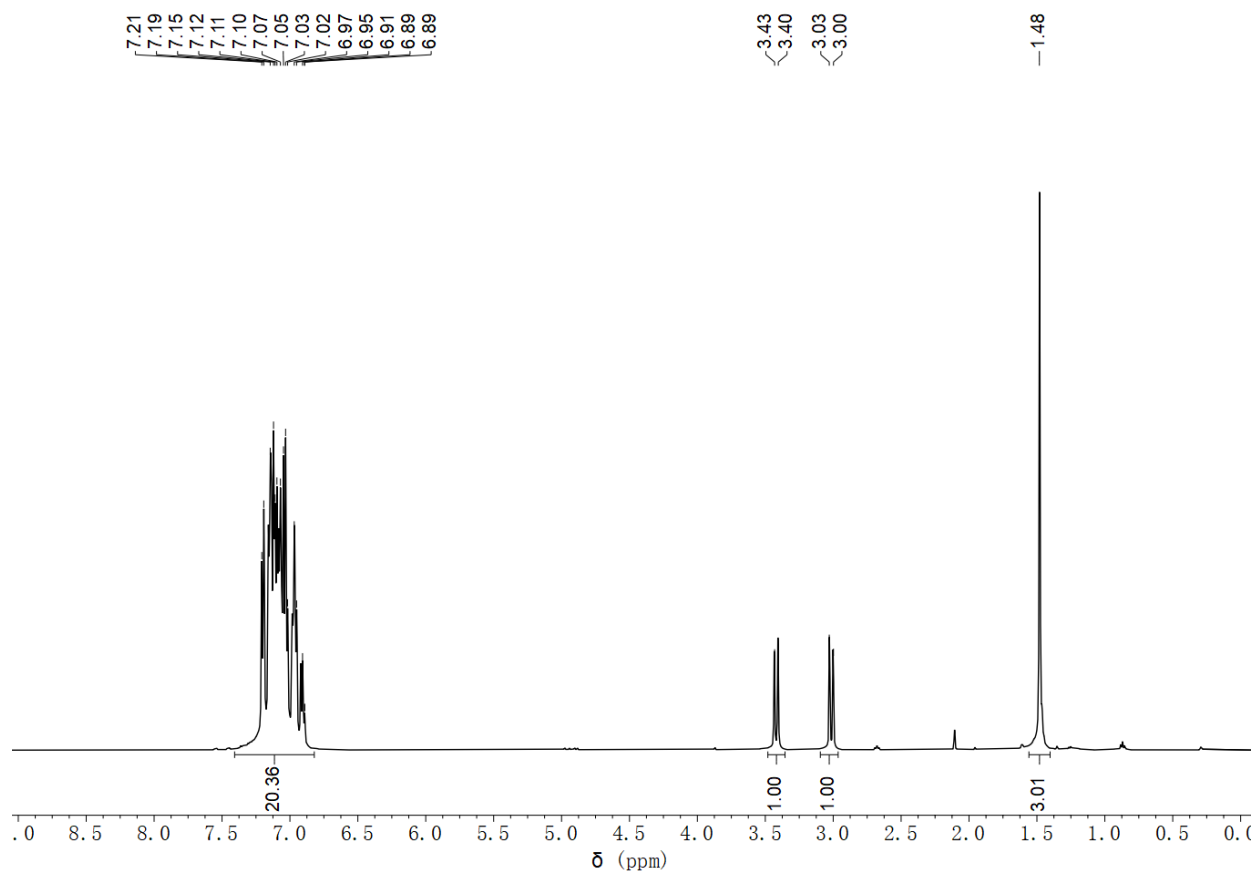

Figure S3-4.  $^1\text{H}$  NMR spectrum of 1-methyl-1,3,3-triphenyl-2,3-dihydro-1H-indene in  $\text{C}_6\text{D}_6$

#### d) Hydrosilylation of 2-norbornene

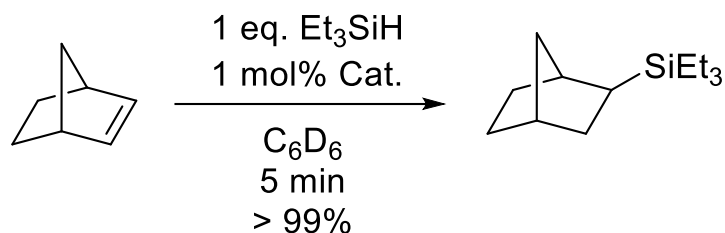

To a solution of norbornene (9.4 mg, 0.1 mmol) and triethylsilane (0.1 mmol, 1 eq.) in C<sub>6</sub>D<sub>6</sub> (0.6 mL) was added the catalyst (**3**, 1.5 mg, 0.001 mmol), the solution mixed for 1 min and then probed by <sup>1</sup>H NMR to determine the reaction progress. After completion of the reaction was confirmed, the volatiles were removed under vacuum and the product was eluted by n-hexane to afford a colorless oil. The yield of (Bicyclo [2.2.1] heptan-2-yl)triethylsilane was 99% (20.8 mg). Product identification corresponds with literature values.

**(Bicyclo [2.2.1] heptan-2-yl)triethylsilane**<sup>[S10]</sup> (CAS: 164859-22-7):

<sup>1</sup>H NMR (500 MHz, C<sub>6</sub>D<sub>6</sub>, ppm): δ 2.23 (s, 1H), 2.17 (s, 1H), 1.55-1.52 (m, 2H), 1.45-1.42 (m, 1H), 1.38-1.33 (m, 1H), 1.23-1.19 (m, 3H), 1.13-1.11 (m, 1H), 0.99 (t, *J*=8.0 Hz, 9H), 0.65-0.62 (m, 1H), 0.53 (qd, *J*=7.9, 1.2 Hz, 6H).

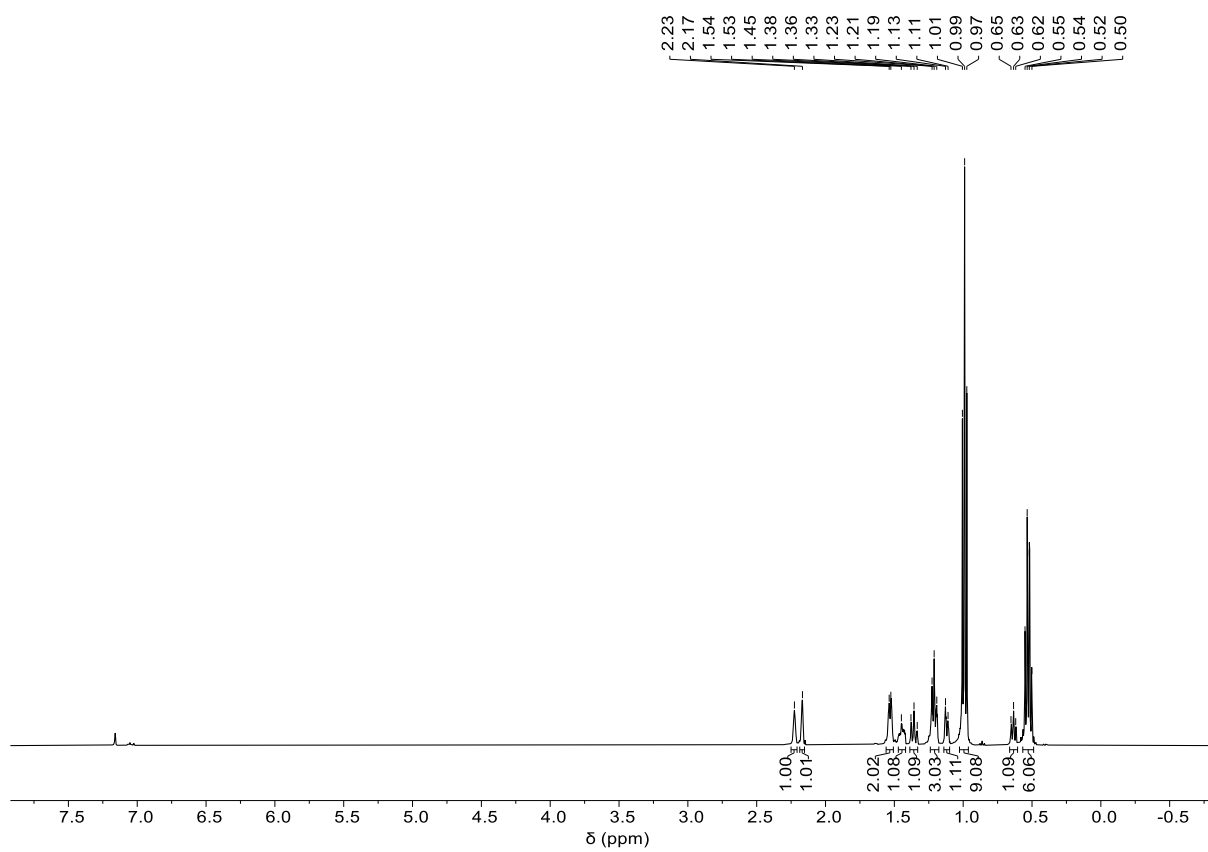

Figure S3-5.  $^1\text{H}$  NMR spectrum of (bicyclo[2.2.1]heptan-2-yl)triethylsilane in  $\text{C}_6\text{D}_6$

## X-ray Crystallographic Data

Table S1. Crystal data and structure refinement details for compounds **1**, **2** and **3**

| Compounds                                  | 1                                                                | 2                                                                 | 3                                                                      |
|--------------------------------------------|------------------------------------------------------------------|-------------------------------------------------------------------|------------------------------------------------------------------------|
| CCDC                                       | 2294592                                                          | 2294593                                                           | 2294596                                                                |
| Empirical formula                          | C <sub>39</sub> H <sub>37</sub> AlF <sub>10</sub> N <sub>2</sub> | C <sub>77</sub> H <sub>52</sub> AlBF <sub>30</sub> N <sub>2</sub> | C <sub>75.45</sub> H <sub>48.2</sub> AlBF <sub>31</sub> N <sub>2</sub> |
| Formula weight                             | 750.68                                                           | 1612.99                                                           | 1609.55                                                                |
| Temperature, K                             | 150.00                                                           | 150                                                               | 150.0                                                                  |
| Crystal system                             | orthorhombic                                                     | triclinic                                                         | monoclinic                                                             |
| Space group                                | <i>Pca</i> 2 <sub>1</sub>                                        | <i>P</i> -1                                                       | <i>P</i> 2 <sub>1</sub> / <i>c</i>                                     |
| a, Å                                       | 14.3469(3)                                                       | 12.8701(5)                                                        | 18.2366(7)                                                             |
| b, Å                                       | 12.6120(3)                                                       | 14.0245(6)                                                        | 12.6216(4)                                                             |
| c, Å                                       | 20.0825(4)                                                       | 21.8859(9)                                                        | 30.5952(12)                                                            |
| α, deg                                     | 90                                                               | 75.193(2)                                                         | 90                                                                     |
| β, deg                                     | 90                                                               | 78.870(2)                                                         | 94.208(2)                                                              |
| γ, deg                                     | 90                                                               | 70.815(2)                                                         | 90                                                                     |
| V, Å <sup>3</sup>                          | 3633.79(14)                                                      | 3581.2(3)                                                         | 7023.3(4)                                                              |
| Z                                          | 4                                                                | 2                                                                 | 4                                                                      |
| D <sub>calcd</sub> , g/cm <sup>3</sup>     | 1.372                                                            | 1.496                                                             | 1.522                                                                  |
| μ/mm <sup>-1</sup>                         | 1.219                                                            | 1.368                                                             | 1.416                                                                  |
| F(000)                                     | 1552.0                                                           | 1632                                                              | 3248.0                                                                 |
| θ range, °                                 | 7.008-136.752                                                    | 4.206-133.188                                                     | 4.858-133.192                                                          |
| Index ranges                               | -17 ≤ h ≤ 17<br>-15 ≤ k ≤ 11<br>-23 ≤ l ≤ 24                     | -15 ≤ h ≤ 15<br>-16 ≤ k ≤ 16<br>-26 ≤ l ≤ 26                      | -21 ≤ h ≤ 21<br>-14 ≤ k ≤ 15<br>-36 ≤ l ≤ 36                           |
| Reflections collected                      | 29274                                                            | 148386                                                            | 159556                                                                 |
| Independent reflections                    | 6530<br>R <sub>int</sub> = 0.0782<br>R <sub>sigma</sub> = 0.0524 | 12648<br>R <sub>int</sub> = 0.0636<br>R <sub>sigma</sub> = 0.0252 | 12386<br>R <sub>int</sub> = 0.1309<br>R <sub>sigma</sub> = 0.0432      |
| Data/restraints/parameters                 | 6530/1/481                                                       | 12648/494/1266                                                    | 12386/120/1091                                                         |
| Goodness-of-fit on F <sup>2</sup>          | 1.018                                                            | 1.049                                                             | 1.036                                                                  |
| Final R indexes [I >= 2σ (I)]              | R <sub>1</sub> = 0.0343<br>wR <sub>2</sub> = 0.0736              | R <sub>1</sub> = 0.0642<br>wR <sub>2</sub> = 0.1643               | R <sub>1</sub> = 0.0510<br>wR <sub>2</sub> = 0.1437                    |
| Final R indexes [all data]                 | R <sub>1</sub> = 0.0444<br>wR <sub>2</sub> = 0.0779              | R <sub>1</sub> = 0.0719<br>wR <sub>2</sub> = 0.1694               | R <sub>1</sub> = 0.0693<br>wR <sub>2</sub> = 0.1556                    |
| Largest diff. peak/hole, e/Å <sup>-3</sup> | 0.16/-0.17                                                       | 1.03/-0.42                                                        | 0.44/-0.45                                                             |

Table S2. Crystal data and structure refinement details for compounds **4**, **5**

|                                            | <b>4</b>                                                                        | <b>5</b>                                                         |
|--------------------------------------------|---------------------------------------------------------------------------------|------------------------------------------------------------------|
| CCDC                                       | 2294597                                                                         | 2294599                                                          |
| Empirical formula                          | C <sub>87</sub> H <sub>67</sub> Al <sub>2</sub> BF <sub>30</sub> N <sub>2</sub> | C <sub>39</sub> H <sub>36</sub> AlF <sub>11</sub> N <sub>2</sub> |
| Formula weight                             | 1775.19                                                                         | 768.68                                                           |
| Temperature, K                             | 200                                                                             | 260                                                              |
| Crystal system                             | monoclinic                                                                      | orthorhombic                                                     |
| Space group                                | <i>P</i> 2 <sub>1</sub> / <i>n</i>                                              | <i>Pca</i> 2 <sub>1</sub>                                        |
| a, Å                                       | 13.1747(9)                                                                      | 14.4808(11)                                                      |
| b, Å                                       | 18.3068(13)                                                                     | 12.6637(9)                                                       |
| c, Å                                       | 33.223(3)                                                                       | 20.2440(14)                                                      |
| α, deg                                     | 90                                                                              | 90                                                               |
| β, deg                                     | 94.272(4)                                                                       | 90                                                               |
| γ, deg                                     | 90                                                                              | 90                                                               |
| V, Å <sup>3</sup>                          | 7990.8(10)                                                                      | 3712.4(5)                                                        |
| Z                                          | 4                                                                               | 4                                                                |
| D <sub>calcd</sub> , g/cm <sup>3</sup>     | 1.476                                                                           | 1.375                                                            |
| μ/mm <sup>-1</sup>                         | 1.383                                                                           | 1.247                                                            |
| F(000)                                     | 3616                                                                            | 1584                                                             |
| θ range, °                                 | 5.334-133.192                                                                   | 6.98 - 138.142                                                   |
| Index ranges                               | -15 ≤ h ≤ 14<br>-20 ≤ k ≤ 21<br>-39 ≤ l ≤ 39                                    | -17 ≤ h ≤ 17<br>-15 ≤ k ≤ 15<br>-24 ≤ l ≤ 24                     |
| Reflections collected                      | 79000                                                                           | 45397                                                            |
| Independent reflections                    | 14061<br>R <sub>int</sub> = 0.1152<br>R <sub>sigma</sub> = 0.0660               | 6772<br>R <sub>int</sub> = 0.0873<br>R <sub>sigma</sub> = 0.0552 |
| Data/restraints/parameters                 | 14061/1146/1196                                                                 | 6772/1/486                                                       |
| Goodness-of-fit on F <sup>2</sup>          | 1.037                                                                           | 1.092                                                            |
| Final R indexes [I ≥ 2σ (I)]               | R <sub>1</sub> = 0.0718<br>wR <sub>2</sub> = 0.1938                             | R <sub>1</sub> = 0.0564<br>wR <sub>2</sub> = 0.1304              |
| Final R indexes [all data]                 | R <sub>1</sub> = 0.0965<br>wR <sub>2</sub> = 0.2135                             | R <sub>1</sub> = 0.0680<br>wR <sub>2</sub> = 0.1391              |
| Largest diff. peak/hole, e/Å <sup>-3</sup> | 0.86/-0.51                                                                      | 0.23/-0.22                                                       |

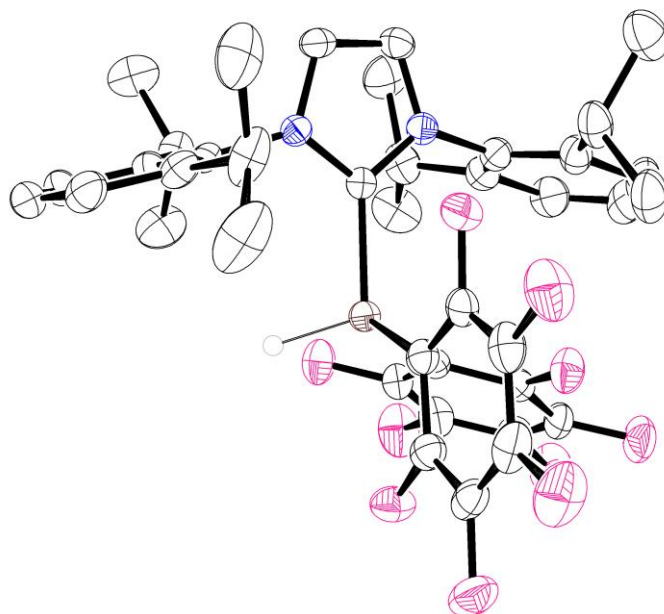

Figure S4-1. Solid-state structures of **1**. Hydrogen atoms except that on Al are omitted for clarity. Thermal ellipsoids are set at the 50% probability level.

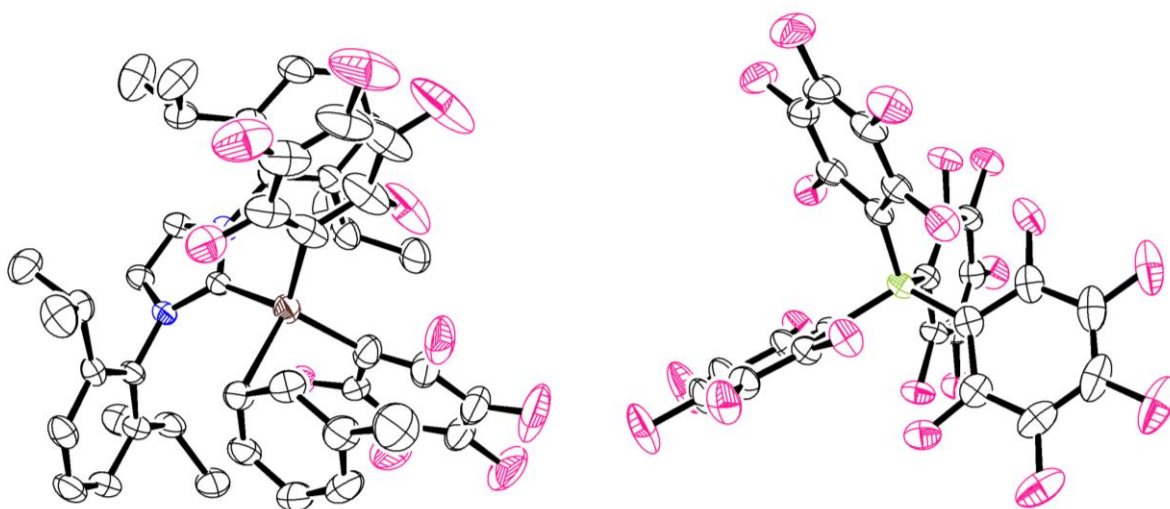

Figure S4-2. Solid-state structures of **2**. Hydrogen atoms are omitted for clarity. Thermal ellipsoids are set at the 50% probability level.



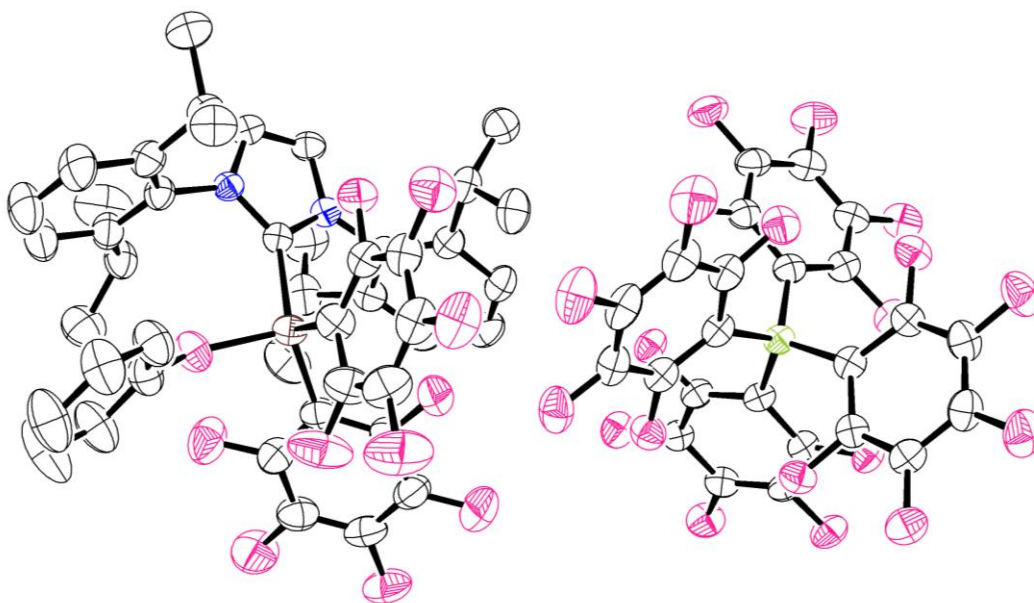

Figure S4-3. Solid-state structures of **3**. Hydrogen atoms are omitted for clarity. Thermal ellipsoids are set at the 50% probability level.

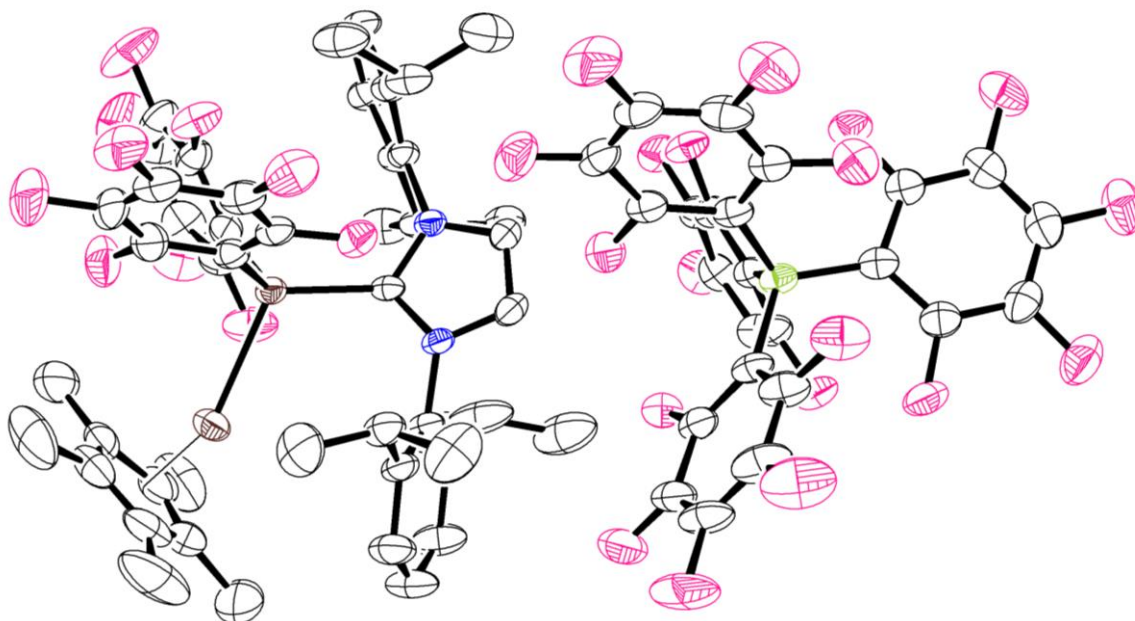

Figure S4-4. Solid-state structures of **4**. Hydrogen atoms are omitted for clarity. Thermal ellipsoids are set at the 50% probability level.

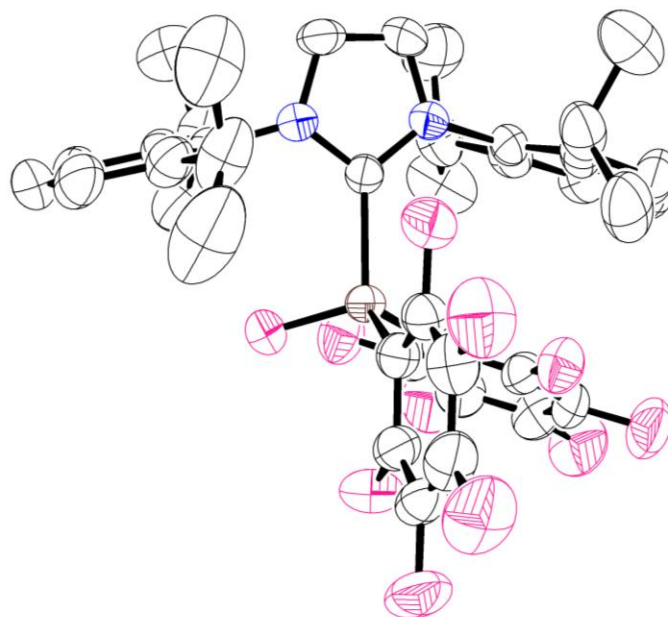

Figure S4-5. Solid-state structures of **5**. Hydrogen atoms are omitted for clarity. Thermal ellipsoids are set at the 50% probability level.

## Computational Details

Density functional theory (DFT) calculations were carried out using the Gaussian 16 package<sup>[S12]</sup>. Geometry optimizations were performed with the hybrid B3LYP functional<sup>[S13]</sup> and The def2-SVP basis set<sup>[S14]</sup> was employed for all the atoms. Frequency calculations at the same level of theory were performed to identify the number of imaginary frequencies (zero for local minimum) and provide the thermal corrections of Gibbs free energy. The single-point energy calculations were performed at the B3LYP/def2-TZVP level of theory for solution-phase (fluorobenzene). Optimized structures were visualized by the Chemcraft<sup>[15]</sup> program.

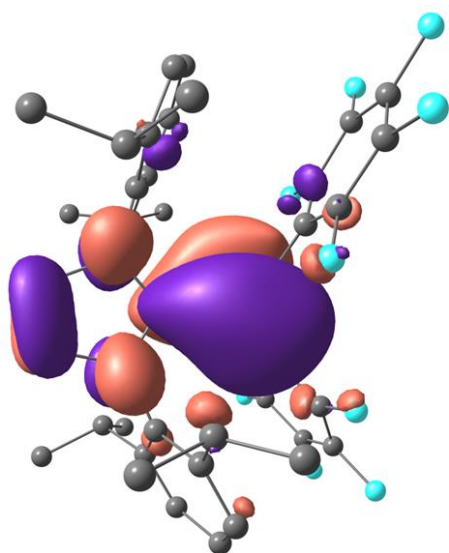

LUMO (-5.44 eV)  
Gap: 4.34 eV (419.57 kJ/mol)

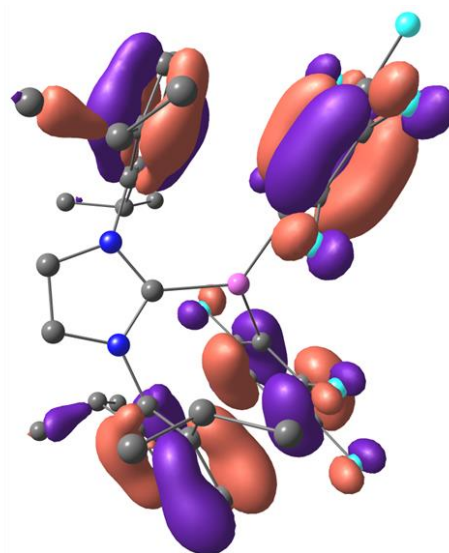

HOMO (-9.79 eV)

**Figure S5-1.** Selected molecular orbitals for **I** at B3LYP-D3/def2-TZVP level.

Isovalue = 0.03.

## FIA and HIA calculation

For gas phase FIA and HIA calculation, geometries and final electronic energies were obtained at the BP86-D3/def2-SVP level of theory. The FIA reaction enthalpies were calculated according to the scheme proposed by Krossing<sup>[S16]</sup> using the given G3 anchor points and isodesmic reactions according to: The TMS-system anchor enthalpy of  $\text{Me}_3\text{Si}^+ + \text{F}^- \rightarrow \text{Me}_3\text{SiF}$  at the G3 (958 kJ/mol) and  $\text{Me}_3\text{Si}^+ + \text{H}^- \rightarrow \text{Me}_3\text{SiH}$  at the G3 (959 kJ/mol). For solvent corrected (fluorobenzene) FIA ( $\text{FIA}_{\text{solv}}$ ) and HIA ( $\text{HIA}_{\text{solv}}$ ), the PCM method was used on the BP86-D3/def2-SVP-level. The final solvation corrected  $\text{FIA}_{\text{solv}}$  is obtained by eq. 3 and eq. 4:

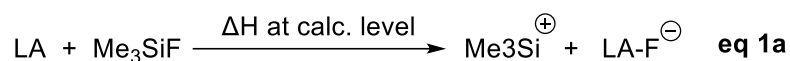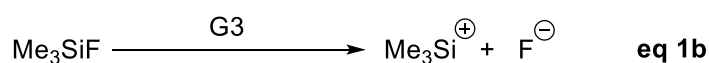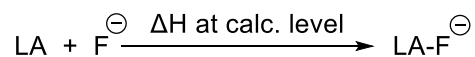

$$\text{FIA} = \text{eq 1a} - \text{eq 1b}$$

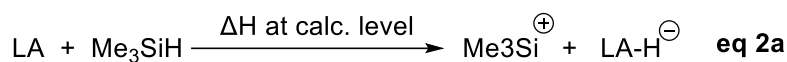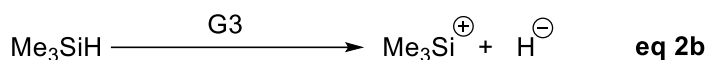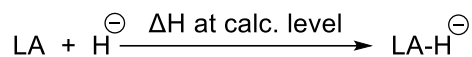

$$\text{HIA} = \text{eq 2a} - \text{eq 2b}$$

$$\text{FIA}_{\text{solv}} = \text{FIA} - [\Delta\text{G}_{\text{solv}}(\text{LA-F}^-) - \Delta\text{G}_{\text{solv}}(\text{LA}) - \Delta\text{G}_{\text{solv}}(\text{F}^-)] \quad \text{eq 3}$$

$$\text{HIA}_{\text{solv}} = \text{HIA} - [\Delta\text{G}_{\text{solv}}(\text{LA-H}^-) - \Delta\text{G}_{\text{solv}}(\text{LA}) - \Delta\text{G}_{\text{solv}}(\text{H}^-)] \quad \text{eq 4}$$

Table S3. Computed energies of FIAs and HIAs

|                                                      | <b>G</b><br>(a.u.) | <b>G<sub>solv</sub></b><br>(a.u.) | <b>ΔG<sub>solv</sub></b><br>(kJ/mol) | <b>FIA</b><br>(kJ/mol) | <b>FIA<sub>solv</sub></b><br>(kJ/mol) | <b>HIA</b><br>(kJ/mol) | <b>HIA<sub>solv</sub></b><br>(kJ/mol) |
|------------------------------------------------------|--------------------|-----------------------------------|--------------------------------------|------------------------|---------------------------------------|------------------------|---------------------------------------|
| <b>SbF<sub>5</sub></b>                               | -739.254323        | -739.259417                       | -13.374297                           | <b>483.23</b>          | <b>383.48</b>                         |                        |                                       |
| <b>SbF<sub>6</sub><sup>-</sup></b>                   | -839.181431        | -839.249054                       | -177.544187                          |                        |                                       |                        |                                       |
| <b>B(C<sub>6</sub>F<sub>5</sub>)<sub>3</sub></b>     | -2206.621965       | -2206.625571                      | -9.467553                            | <b>458.29</b>          | <b>261.34</b>                         | <b>488.09</b>          | <b>263.11</b>                         |
| <b>B(C<sub>6</sub>F<sub>5</sub>)<sub>3</sub>-F</b>   | -2306.543723       | -2306.588818                      | -118.396922                          |                        |                                       |                        |                                       |
| <b>B(C<sub>6</sub>F<sub>5</sub>)<sub>3</sub>-H</b>   | -2207.316797       | -2207.359579                      | -112.324141                          |                        |                                       |                        |                                       |
| <b>Al(C<sub>6</sub>F<sub>5</sub>)<sub>3</sub></b>    | -2424.18735        | -2424.192192                      | -12.712671                           | <b>547.04</b>          | <b>336.34</b>                         | <b>491.6</b>           | <b>259.38</b>                         |
| <b>Al(C<sub>6</sub>F<sub>5</sub>)<sub>3</sub>-F</b>  | -2524.143788       | -2524.18488                       | -107.887046                          |                        |                                       |                        |                                       |
| <b>Al(C<sub>6</sub>F<sub>5</sub>)<sub>3</sub>-H</b>  | -2424.883787       | -2424.92505                       | -108.336006                          |                        |                                       |                        |                                       |
| <b>HAl(C<sub>6</sub>F<sub>5</sub>)<sub>2</sub></b>   | -1697.502899       | -1697.507665                      | -12.513133                           | <b>508.79</b>          | <b>320.33</b>                         | <b>459.55</b>          | <b>251.43</b>                         |
| <b>HAl(C<sub>6</sub>F<sub>5</sub>)<sub>2</sub>-F</b> | -1797.445693       | -1797.495179                      | -129.925493                          |                        |                                       |                        |                                       |
| <b>HAl(C<sub>6</sub>F<sub>5</sub>)<sub>2</sub>-H</b> | -1698.187145       | -1698.237508                      | -132.228056                          |                        |                                       |                        |                                       |
| <b>J<sup>[17]</sup></b>                              | -1323.771359       | -1323.810764                      | -103.457827                          | <b>758.77</b>          | <b>379.37</b>                         | <b>692.63</b>          | <b>287.57</b>                         |
| <b>J-F</b>                                           | -1423.803313       | -1423.814713                      | -29.9307                             |                        |                                       |                        |                                       |
| <b>J-H</b>                                           | -1324.539304       | -1324.549299                      | -26.2418725                          |                        |                                       |                        |                                       |
| <b>F<sup>[18]</sup></b>                              | -1755.668391       | -1755.707645                      | -103.061377                          | <b>764.78</b>          | <b>372.04</b>                         | <b>693</b>             | <b>276.02</b>                         |
| <b>F-F</b>                                           | -1855.706326       | -1855.712494                      | -16.194084                           |                        |                                       |                        |                                       |
| <b>F-H</b>                                           | -1756.439994       | -1756.445293                      | -13.9125245                          |                        |                                       |                        |                                       |
| <b>D<sup>[19]</sup></b>                              | -1675.800245       | -1675.843343                      | -113.153799                          | <b>767.2</b>           | <b>375.97</b>                         | <b>802.5</b>           | <b>380.34</b>                         |
| <b>D-F</b>                                           | -1775.836654       | -1775.847233                      | -27.7751645                          |                        |                                       |                        |                                       |
| <b>D-H</b>                                           | -1676.612247       | -1676.619419                      | -18.830086                           |                        |                                       |                        |                                       |
| <b>I</b>                                             | -2855.619333       | -2855.662861                      | -114.282764                          | <b>813.63</b>          | <b>422.14</b>                         | <b>758.19</b>          | <b>340.13</b>                         |
| <b>I-F</b>                                           | -2955.672785       | -2955.683704                      | -28.6678345                          |                        |                                       |                        |                                       |
| <b>I-H</b>                                           | -2856.412984       | -2856.422149                      | -24.0627075                          |                        |                                       |                        |                                       |
| <b>F-</b>                                            | -99.698735         | -99.815235                        | -305.87075                           |                        |                                       |                        |                                       |
| <b>H-</b>                                            | -0.498737          | -0.623604                         | -327.838309                          |                        |                                       |                        |                                       |

G values are calculated at BP86-D3/def2-SVP level;

G<sub>solv</sub> values are calculated at PCMBP86-D3/def2-SVP level.

Table S4. The Optimized structures of **D**, **F** and **J**

|          |                                                                                      |
|----------|--------------------------------------------------------------------------------------|
| <b>D</b> | 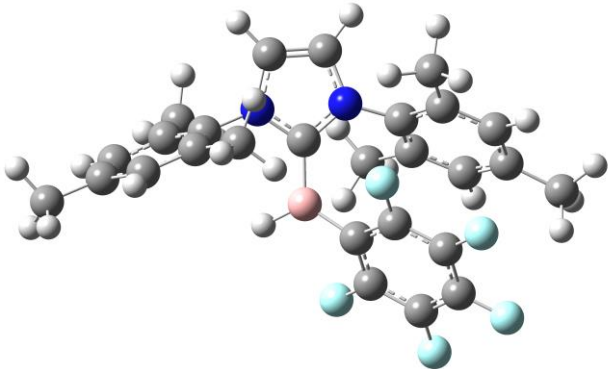   |
| <b>F</b> |   |
| <b>J</b> |  |

## Reference

- [S1] J. Tan, C. Hu, X. Yang, S. Ju, L. Cao, Y. Wu, L. L. Liu and D. W. Stephan, *Chem. Commun.*, 2023, **59**, 282-285.
- [S2] F. E. Hahn and M. C. Jahnke, *Angew. Chem. Int. Ed.* 2008, **47**, 3122-3172.
- [S3] C. Ganesamoorthy, S. Loerke, C Gemel, P. Jerabek, M Winter, G Frenking and R. A. Fischer, *Chem. Commun.*, 2013, **49**, 2858.
- [S4] O. V. Dolomanov, L. J. Bourhis, R. J. Gildea, J. A. K. Howard and H. Puschmann, *J. Appl. Crystallogr.*, 2009, **42**, 339-341.
- [S5] G. Sheldrick, *Acta Crystallogr. Sect. A.*, 2015, **71**, 3-8.
- [S6] G. Sheldrick, *Acta Crystallogr. Sect. A.*, 2008, **64**, 112-122.
- [S7] **a)** R. C. Fort and P. R. Schleyer, *Chemical Reviews.*, 1964, **64**(3): 277-300; **b)** M. Mehta and J. M. Goicoechea, *Angew. Chem. Int. Ed.*, 2020, **59**, 2715-2719.
- [S8] E. M. Budén, J. I. Bardagí, M. Puiatti and R. A. Rossi, *The Journal of Organic Chemistry.*, 2017 **82**(16), 8325-8333.
- [S9] D. Roth, H. Wadepohl and L. Greb, *Angew. Chem. Int. Ed.*, 2020, **59**, 20930-20934.
- [S10] D. Roth, J. Stirn, D. W. Stephan and L. Greb, *J. Am. Chem. Soc.*, 2021, **143**, 38, 15845-15851.
- [S11] M. Ahrens, G. Scholz, T. Braun and E. Kemnitz, *Angew. Chem. Int. Ed.*, 2013, **52**, 5328-5332.
- [S12] Gaussian 16, Revision C.01, J. Frisch, G. W. Trucks, H. B. Schlegel, G. E. Scuseria,; M. A. Robb, J. R. Cheeseman, G. Scalmani, V. Barone,; G. A. Petersson, H. Nakatsuji, X. Li, M. Caricato, A. V. Marenich,; J. Bloino, B. G. Janesko, R. Gomperts, B. Mennucci, H. P. Hratchian,; J. V. Ortiz, A. F. Izmaylov, J. L. Sonnenberg, D. Williams-Young,; F. Ding, F. Lipparini, F. Egidi, J. Goings, B. Peng, A. Petrone,; T. Henderson, D. Ranasinghe, V. G. Zakrzewski, J. Gao, N. Rega,; G. Zheng, W. Liang, M. Hada, M. Ehara, K. Toyota, R. Fukuda,; J. Hasegawa, M. Ishida, T. Nakajima, Y. Honda, O. Kitao, H. Nakai,; T. Vreven, K. Throssell, J. A. Montgomery, Jr., J. E. Peralta,; F. Ogliaro, M. J. Bearpark, J. J. Heyd, E. N. Brothers, K. N. Kudin,; V. N. Staroverov, T. A. Keith, R. Kobayashi, J. Normand,; K. Raghavachari, A. P. Rendell, J. C. Burant, S. S. Iyengar,; J. Tomasi, M. Cossi, J. M. Millam, M. Klene, C. Adamo, R. Cammi,; J. W. Ochterski, R. L. Martin, K. Morokuma, O. Farkas,; J. B. Foresman, and D. J. Fox, Gaussian, Inc., Wallingford CT, 2019.
- [S13] **a)** A. D. Becke, *J. Chem. Phys.*, 1993, **98**, 5648-5652; **b)** A. D. Becke, *J. Chem. Phys.*, 1993, **98**, 1372-1377.
- [S14] F. Weigend and R. Ahlrichs, *Phys. Chem. Chem. Phys.*, 2005, **7**, 3297-3305.
- [S15] G. A. Andrienko, C. ChemCraft, <http://www.chemcraftprog.com>. Accessed date: Oct. 30, 2022.
- [S16] **a)** H. Böhler, N. Trapp, D. Himmel, M. Schleep and I. Krossing, *Dalton Trans.*, 2015, **44**, 7489-7499; **b)** P. Erdmann, J. Leitner, J. Schwarz and L. Greb, *Chem, Phys, Chem.*, 2020, **21**, 987-994.



- [S17] **J:** L. Werner, J. Hagn, J. Walpuski and U. Radius, *Angew. Chem. Int. Ed.*, 2023, e202312111.
- [S18] **F:** A. Friedrich, J. Eyselain, H. Elsen, J. Langer, J. Pahl, M. Wiesinger and S. Harder, *Chem. Eur. J.*, 2021, **27**, 7756-7763.
- [S19] **D:** C. Chen, J. Li, C. G. Daniliuc, C. Mück-Lichtenfeld, G. Kehr, G. Erker, *Angew. Chem. Int. Ed.*, 2020, **59**, 21460.

## Cartesian Coordinates of the Optimized Geometries

I (B3LYP-D3/def2-TZVP)

SCF Done: E(RB3LYP) = -2859.23956883 A.U.

|    |             |             |             |
|----|-------------|-------------|-------------|
| Al | 0.00005900  | 0.62644700  | 0.00019500  |
| F  | 1.79781500  | 0.81983500  | -2.51152500 |
| N  | -0.98088300 | -2.16544200 | -0.44704400 |
| N  | 0.98091400  | -2.16567500 | 0.44652700  |
| F  | 1.70884300  | 2.24492300  | 1.96743400  |
| F  | 4.23600800  | 1.98659800  | -2.83744300 |
| F  | -1.79797800 | 0.81906000  | 2.51185000  |
| C  | 0.00004800  | -1.35276000 | -0.00013700 |
| F  | -1.70871600 | 2.24513300  | -1.96679400 |
| C  | 0.61637200  | -3.48214700 | 0.28672300  |
| H  | 1.25145900  | -4.29263700 | 0.59004000  |
| C  | -0.61660900 | -3.48200200 | -0.28740700 |
| H  | -1.25188000 | -4.29233000 | -0.59078500 |
| C  | -2.20744700 | -1.65595900 | -1.01967800 |
| C  | 2.20755300  | -1.65651600 | 1.01930900  |
| C  | -2.15391600 | -1.12990600 | -2.31929000 |
| F  | 5.41981800  | 3.23393200  | -0.73743100 |
| F  | 4.17169600  | 3.35671100  | 1.67067200  |
| C  | 3.35998600  | -1.65346800 | 0.22238300  |
| C  | 2.15399200  | -1.13069500 | 2.31900700  |
| C  | -3.35980900 | -1.65296300 | -0.22267800 |
| C  | -0.92167200 | -1.27563800 | -3.19963300 |
| H  | -0.03196100 | -1.22196700 | -2.56789000 |
| C  | -3.31749900 | -0.53505800 | -2.80214600 |
| H  | -3.32446500 | -0.10292700 | -3.79137900 |
| C  | -4.46589800 | -0.48124500 | -2.02741000 |
| H  | -5.35383000 | -0.00322400 | -2.41967600 |
| F  | -4.23635600 | 1.98541600  | 2.83775700  |
| C  | 3.40975300  | -2.33981700 | -1.13129300 |
| H  | 2.39229700  | -2.39018500 | -1.52571700 |
| C  | 0.92164300  | -1.27634400 | 3.19919900  |
| H  | 0.03200800  | -1.22280400 | 2.56733500  |

|   |             |             |             |
|---|-------------|-------------|-------------|
| C | -4.49118500 | -1.04454600 | -0.76053200 |
| H | -5.40192400 | -1.00701000 | -0.18056800 |
| C | 3.31757900  | -0.53601300 | 2.80205400  |
| H | 3.32448800  | -0.10403700 | 3.79135800  |
| C | -3.40951400 | -2.33965500 | 1.13082000  |
| H | -2.39206400 | -2.38994100 | 1.52526300  |
| C | -1.70175800 | 1.50846200  | 0.26558600  |
| C | 1.70176600  | 1.50870200  | -0.26509500 |
| C | -3.92465100 | -3.77920300 | 0.96073800  |
| H | -4.95781600 | -3.77147800 | 0.60989900  |
| H | -3.89419500 | -4.30975800 | 1.91322400  |
| H | -3.34019100 | -4.34569300 | 0.23580600  |
| C | 2.37268300  | 1.46761200  | -1.47380000 |
| C | 4.49135100  | -1.04519400 | 0.76041600  |
| H | 5.40211800  | -1.00756700 | 0.18050200  |
| C | -0.92162800 | -2.66355900 | -3.86225900 |
| H | -0.95205100 | -3.46743000 | -3.12631600 |
| H | -0.02489300 | -2.79374400 | -4.46951500 |
| H | -1.79117200 | -2.77253900 | -4.51231900 |
| C | -4.26129300 | -1.60797900 | 2.17020800  |
| H | -3.93827200 | -0.58086300 | 2.31609800  |
| H | -4.18513300 | -2.11979400 | 3.12993200  |
| H | -5.31618600 | -1.59824900 | 1.89510800  |
| C | -0.78198600 | -0.18072800 | -4.25825100 |
| H | -1.55157900 | -0.26438600 | -5.02643300 |
| H | 0.18276000  | -0.27680100 | -4.75588400 |
| H | -0.84049700 | 0.81659500  | -3.82502500 |
| C | 4.46602700  | -0.48213700 | 2.02740500  |
| H | 5.35396000  | -0.00422800 | 2.41980700  |
| C | 0.78182800  | -0.18125400 | 4.25760900  |
| H | 1.55137700  | -0.26472900 | 5.02585800  |
| H | -0.18294900 | -0.27729100 | 4.75518900  |
| H | 0.84031400  | 0.81599400  | 3.82420300  |
| C | -2.37280600 | 1.46700200  | 1.47420700  |
| C | 4.26136500  | -1.60771700 | -2.17051500 |

|   |             |             |             |
|---|-------------|-------------|-------------|
| H | 3.93830500  | -0.58055100 | -2.31596200 |
| H | 4.18510400  | -2.11916200 | -3.13042700 |
| H | 5.31629200  | -1.59806300 | -1.89554200 |
| F | -5.42010100 | 3.23307300  | 0.73790100  |
| C | 3.92523600  | -3.77929500 | -0.96164300 |
| H | 4.95844700  | -3.77140700 | -0.61094300 |
| H | 3.89478300  | -4.30961200 | -1.91426200 |
| H | 3.34102800  | -4.34612200 | -0.23678200 |
| C | 2.32991100  | 2.17481100  | 0.77299300  |
| C | 3.61407400  | 2.04849600  | -1.66307400 |
| F | -4.17173700 | 3.35655600  | -1.67004400 |
| C | -2.32988800 | 2.17470900  | -0.77242400 |
| C | 0.92158100  | -2.66415300 | 3.86205900  |
| H | 0.95210700  | -3.46814400 | 3.12625200  |
| H | 0.02478500  | -2.79426300 | 4.46924000  |
| H | 1.79105900  | -2.77299600 | 4.51223100  |
| C | 4.22102200  | 2.69115900  | -0.58842900 |
| C | 3.57922300  | 2.75625400  | 0.64361000  |
| C | -3.61429900 | 2.04766900  | 1.66347200  |
| C | -4.22121600 | 2.69049500  | 0.58890600  |
| C | -3.57929500 | 2.75595000  | -0.64305200 |

**SbF<sub>5</sub> (BP86-D3/Def2-SVP)**

**SCF Done: E(RB-P86) = -739.231044542 A.U.**

|    |             |             |             |
|----|-------------|-------------|-------------|
| Sb | 0.00000200  | 0.00013600  | 0.00000000  |
| F  | 0.00000200  | 0.00340300  | 1.92298800  |
| F  | 0.00753400  | 1.91467900  | 0.00000000  |
| F  | 0.00000200  | 0.00340300  | -1.92298800 |
| F  | 1.65161100  | -0.96762500 | 0.00000000  |
| F  | -1.65916100 | -0.95463100 | 0.00000000  |

**SbF<sub>5</sub> (BP86-D3/Def2-SVP, PCM, Fluorobenzene)**

**SCF Done: E(RB-P86) = -739.235527147 A.U.**

|    |             |             |             |
|----|-------------|-------------|-------------|
| Sb | -0.00000800 | 0.00074600  | 0.00000000  |
| F  | -0.00000800 | 0.00170600  | 1.92516500  |
| F  | 0.00812200  | 1.91543600  | 0.00000000  |
| F  | -0.00000800 | 0.00170600  | -1.92516500 |
| F  | 1.65111300  | -0.96842500 | 0.00000000  |

F -1.65917400 -0.95465100 0.00000000

**SbF<sub>6</sub><sup>-</sup> (BP86-D3/Def2-SVP)**

BP86-D3/Def2-SVP

SCF Done: E(RB-P86) = -839.163326436 A.U.

Sb 0.00000000 0.00000000 0.00000000

F 0.00000000 0.00000000 1.95131100

F 0.00000000 0.00000000 -1.95131100

F 0.00000000 1.95131100 0.00000000

F -1.95131100 0.00000000 0.00000000

F 0.00000000 -1.95131100 0.00000000

F 1.95131100 0.00000000 0.00000000

**SbF<sub>6</sub><sup>-</sup> (BP86-D3/Def2-SVP, PCM, Fluorobenzene)**

SCF Done: E(RB-P86) = -839.229432939 A.U.

Sb 0.00000000 0.00000000 0.00000000

F 0.00000000 0.00000000 1.94979900

F 0.00000000 0.00000000 -1.94979900

F 0.00000000 1.94979900 0.00000000

F -1.94979900 0.00000000 0.00000000

F 0.00000000 -1.94979900 0.00000000

F 1.94979900 0.00000000 0.00000000

**B(C<sub>6</sub>F<sub>5</sub>)<sub>3</sub> (BP86-D3/Def2-SVP)**

SCF Done: E(RB-P86) = -2206.70915384 A.U.

B -0.00016400 0.00084300 0.00000800

C 1.31541200 0.85374600 0.00000100

C 2.45984600 0.46155500 -0.73047600

C 1.42556600 2.05828500 0.73087000

C 3.64318400 1.21537100 -0.75114100

C 2.59736100 2.82994400 0.75150600

C 3.70931300 2.40426600 0.00010200

C 0.08096500 -1.56491700 0.00018800

C -0.83000900 -2.36047100 -0.73081600

C 1.06953000 -2.26192000 0.73095300

C -0.76797900 -3.76213900 -0.75144800

C 1.15273500 -3.66250700 0.75169300

C 0.22865500 -4.41324200 0.00021700

C -1.39684300 0.71318600 0.00020100

|   |             |             |             |
|---|-------------|-------------|-------------|
| C | -2.49454900 | 0.20514100  | 0.73095000  |
| C | -1.63082000 | 1.89961000  | -0.73108900 |
| C | -3.74943500 | 0.83270400  | 0.75140400  |
| C | -2.87605000 | 2.54609300  | -0.75196900 |
| C | -3.93805600 | 2.00811100  | -0.00031900 |
| F | -1.63559100 | -4.48104200 | -1.47026300 |
| F | 0.29768100  | -5.74378800 | 0.00016900  |
| F | 2.09035600  | -4.28781800 | 1.47009900  |
| F | 1.96384600  | -1.58809900 | 1.47367300  |
| F | -1.78860400 | -1.78284400 | -1.47438000 |
| F | 2.43852400  | -0.65814100 | -1.47296100 |
| F | 0.39558900  | 2.49617100  | 1.47438600  |
| F | 2.67088200  | 3.95441500  | 1.47013400  |
| F | 4.82760600  | 3.12850700  | 0.00022000  |
| F | 4.69962200  | 0.82235400  | -1.46928000 |
| F | -2.35765000 | -0.90616900 | 1.47374000  |
| F | -0.65135000 | 2.44136100  | -1.47446700 |
| F | -3.06530400 | 3.65676200  | -1.47090200 |
| F | -5.12515300 | 2.61301300  | -0.00055500 |
| F | -4.75958000 | 0.33297500  | 1.46983100  |

**B(C<sub>6</sub>F<sub>5</sub>)<sub>3</sub> (BP86-D3/Def2-SVP, PCM, Fluorobenzene)**

**SCF Done: E(RB-P86) = -2206.71236231 A.U.**

|   |             |             |             |
|---|-------------|-------------|-------------|
| B | 0.00041400  | -0.00044500 | 0.00038000  |
| C | 1.54652600  | -0.26046400 | 0.00062900  |
| C | 2.44092200  | 0.55176600  | 0.73321400  |
| C | 2.12665200  | -1.32023600 | -0.73192200 |
| C | 3.82579100  | 0.32977800  | 0.75348800  |
| C | 3.50809500  | -1.56257900 | -0.75233300 |
| C | 4.35918400  | -0.73258300 | 0.00054000  |
| C | -0.54723500 | 1.46868000  | 0.00022400  |
| C | -1.69679800 | 1.83784600  | 0.73397700  |
| C | 0.07975800  | 2.50022100  | -0.73391900 |
| C | -2.19679900 | 3.14823400  | 0.75390700  |
| C | -0.40106600 | 3.81777100  | -0.75488900 |
| C | -1.54441900 | 4.14059500  | -0.00085500 |
| C | -0.99828900 | -1.20905200 | -0.00007800 |

|   |             |             |             |
|---|-------------|-------------|-------------|
| C | -2.20642100 | -1.18023200 | -0.73217800 |
| C | -0.74291300 | -2.39026400 | 0.73196100  |
| C | -3.10794500 | -2.25465700 | -0.75267500 |
| C | -1.62848300 | -3.47787800 | 0.75208100  |
| C | -2.81540000 | -3.40733600 | -0.00047300 |
| F | -3.27752800 | 3.46382700  | 1.47637000  |
| F | -2.01061300 | 5.38952000  | -0.00148100 |
| F | 0.20877900  | 4.76371500  | -1.47793900 |
| F | 1.16627600  | 2.23716000  | -1.48054400 |
| F | -2.34552600 | 0.92767700  | 1.48092200  |
| F | 1.97702900  | 1.56967200  | 1.47872600  |
| F | 1.35581700  | -2.13100400 | -1.47727900 |
| F | 4.02254500  | -2.56491200 | -1.47357800 |
| F | 5.67385300  | -0.95337700 | 0.00064200  |
| F | 4.63933000  | 1.10902200  | 1.47490500  |
| F | -2.52255400 | -0.10678200 | -1.47707700 |
| F | 0.37064300  | -2.49874800 | 1.47715900  |
| F | -1.36098400 | -4.57263600 | 1.47282500  |
| F | -3.66470200 | -4.43484800 | -0.00075100 |
| F | -4.23336800 | -2.19777900 | -1.47357800 |

**B(C<sub>6</sub>F<sub>5</sub>)<sub>3</sub>-F (BP86-D3/Def2-SVP)**

BP86-D3/Def2-SVP

SCF Done: E(RB-P86) = -2306.63094768 A.U.

|   |             |             |             |
|---|-------------|-------------|-------------|
| B | -0.09818500 | -0.05987500 | -0.93680500 |
| C | 0.39594200  | 1.42673700  | -0.36800000 |
| C | -0.18350800 | 2.16971800  | 0.67219100  |
| C | 1.55101900  | 1.99503800  | -0.93542500 |
| C | 0.31014800  | 3.41571200  | 1.10285900  |
| C | 2.08110200  | 3.23749000  | -0.54120300 |
| C | 1.45381600  | 3.95209200  | 0.49172400  |
| C | -1.64324200 | -0.44943800 | -0.48245700 |
| C | -2.05746400 | -1.65502400 | 0.10245400  |
| C | -2.68138300 | 0.44365300  | -0.80398900 |
| C | -3.40498300 | -1.95472000 | 0.38860200  |
| C | -4.03786900 | 0.19103400  | -0.54206300 |
| C | -4.40188100 | -1.02512300 | 0.06009400  |

|   |             |             |             |
|---|-------------|-------------|-------------|
| C | 1.04008800  | -1.12251400 | -0.36859000 |
| C | 1.85159900  | -1.92721900 | -1.18482000 |
| C | 1.30680500  | -1.20474600 | 1.00807100  |
| C | 2.87204600  | -2.75402300 | -0.67064400 |
| C | 2.30718500  | -2.01533400 | 1.56742700  |
| C | 3.10325900  | -2.79561000 | 0.71222100  |
| F | -3.74895200 | -3.12909000 | 0.95634300  |
| F | -5.69660600 | -1.29487400 | 0.31773000  |
| F | -4.99247600 | 1.08941700  | -0.85942500 |
| F | -2.40003000 | 1.63153000  | -1.38188900 |
| F | -1.17261100 | -2.62551300 | 0.42864100  |
| F | -1.27336000 | 1.72005800  | 1.33373400  |
| F | 2.22951300  | 1.34427200  | -1.90336000 |
| F | 3.18872500  | 3.74113300  | -1.12397900 |
| F | 1.94420600  | 5.14221300  | 0.89090500  |
| F | -0.29230900 | 4.09556600  | 2.10020100  |
| F | 1.69330300  | -1.96605500 | -2.52181000 |
| F | 0.55539600  | -0.49198600 | 1.88076800  |
| F | 2.51369500  | -2.05893200 | 2.89974400  |
| F | 4.07371600  | -3.58299700 | 1.21746400  |
| F | 3.62936300  | -3.51002900 | -1.49288000 |
| F | -0.10547800 | -0.02326300 | -2.36070800 |

**B(C<sub>6</sub>F<sub>5</sub>)<sub>3</sub>-F (BP86-D3/Def2-SVP, PCM, Fluorobenzene)**

**SCF Done: E(RB-P86) = -2306.67652092 A.U.**

|   |             |             |             |
|---|-------------|-------------|-------------|
| B | -0.10342800 | -0.05892300 | -0.93777700 |
| C | 0.40254600  | 1.42332100  | -0.37786400 |
| C | -0.16758600 | 2.17155200  | 0.66396000  |
| C | 1.56687100  | 1.97899200  | -0.93800200 |
| C | 0.34403000  | 3.40697800  | 1.10236800  |
| C | 2.11645500  | 3.20992400  | -0.53691900 |
| C | 1.49791300  | 3.92917200  | 0.49800300  |
| C | -1.64957000 | -0.43673100 | -0.48818400 |
| C | -2.07369700 | -1.63841900 | 0.09834700  |
| C | -2.68243800 | 0.46335200  | -0.80639800 |
| C | -3.42226500 | -1.92659400 | 0.38887700  |
| C | -4.03971500 | 0.22392600  | -0.54006200 |



|   |             |             |             |
|---|-------------|-------------|-------------|
| C | -4.41268600 | -0.98897100 | 0.06337400  |
| C | 1.02733800  | -1.12718600 | -0.37173000 |
| C | 1.84101200  | -1.93470100 | -1.18176600 |
| C | 1.28844600  | -1.21249100 | 1.00597800  |
| C | 2.85524600  | -2.76670900 | -0.66562700 |
| C | 2.28155300  | -2.02821700 | 1.56938200  |
| C | 3.07932100  | -2.81144200 | 0.71822300  |
| F | -3.77095800 | -3.09685600 | 0.95706400  |
| F | -5.70564400 | -1.24682800 | 0.32433400  |
| F | -4.98377200 | 1.13093100  | -0.85554800 |
| F | -2.39195500 | 1.65031900  | -1.38792400 |
| F | -1.19528200 | -2.61687600 | 0.42252400  |
| F | -1.26565000 | 1.73437000  | 1.32293900  |
| F | 2.23875200  | 1.32143600  | -1.91020800 |
| F | 3.23149000  | 3.69588900  | -1.11562900 |
| F | 2.00451000  | 5.10627600  | 0.90441700  |
| F | -0.25152200 | 4.08780500  | 2.10071100  |
| F | 1.68975900  | -1.96994400 | -2.52326500 |
| F | 0.53581800  | -0.49641800 | 1.87709100  |
| F | 2.47845600  | -2.07241300 | 2.90122700  |
| F | 4.04110800  | -3.60198100 | 1.22668900  |
| F | 3.61129600  | -3.52169000 | -1.48660900 |
| F | -0.11079700 | -0.02845600 | -2.37146800 |

**B(C<sub>6</sub>F<sub>5</sub>)<sub>3</sub>-H (BP86-D3/Def2-SVP)**

**SCF Done: E(RB-P86) = -2207.41087896 A.U.**

|   |             |             |             |
|---|-------------|-------------|-------------|
| B | -0.05536000 | -0.06917000 | -0.87572900 |
| C | 1.20972700  | -0.97477200 | -0.36630600 |
| C | 1.63944400  | -0.98391000 | 0.97104500  |
| C | 1.97987700  | -1.74795300 | -1.24992300 |
| C | 2.75959000  | -1.70077500 | 1.42445400  |
| C | 3.11187300  | -2.48205200 | -0.84541500 |
| C | 3.50503800  | -2.45403500 | 0.50173000  |
| C | 0.19459400  | 1.47332600  | -0.37493200 |
| C | -0.47342200 | 2.12520300  | 0.67473400  |
| C | 1.18716800  | 2.23870400  | -1.01414700 |
| C | -0.20875100 | 3.45420100  | 1.05556800  |

|   |             |             |             |
|---|-------------|-------------|-------------|
| C | 1.49218200  | 3.56714000  | -0.66723000 |
| C | 0.78636600  | 4.17922100  | 0.38148900  |
| C | -1.53022000 | -0.65762900 | -0.48694500 |
| C | -2.67587400 | 0.05178100  | -0.89654900 |
| C | -1.79776500 | -1.86892500 | 0.17239600  |
| C | -3.99211800 | -0.38182100 | -0.67087700 |
| C | -3.09929700 | -2.34884300 | 0.42159700  |
| C | -4.20601600 | -1.59836900 | -0.00096000 |
| F | -0.88501000 | 4.03607900  | 2.06805200  |
| F | 1.06062400  | 5.45141400  | 0.73516300  |
| F | 2.45147600  | 4.25801100  | -1.31886200 |
| F | 1.91041600  | 1.70505800  | -2.02365300 |
| F | -1.42869900 | 1.48971000  | 1.38953600  |
| F | 0.94585800  | -0.29758400 | 1.90749100  |
| F | 1.65769000  | -1.83159500 | -2.55839800 |
| F | 3.82404200  | -3.21068900 | -1.73099900 |
| F | 4.58515800  | -3.15068600 | 0.90934700  |
| F | 3.12796300  | -1.68218100 | 2.72239900  |
| F | -2.53875400 | 1.22920100  | -1.54876600 |
| F | -0.79525300 | -2.66620000 | 0.61221400  |
| F | -3.29398100 | -3.52086000 | 1.06187300  |
| F | -5.45974800 | -2.04010900 | 0.22725500  |
| F | -5.04984900 | 0.34677100  | -1.08515800 |
| H | -0.02498300 | -0.04416700 | -2.10716200 |

**B(C<sub>6</sub>F<sub>5</sub>)<sub>3</sub>-H (BP86-D3/Def2-SVP, PCM, Fluorobenzene)**

**SCF Done: E(RB-P86) = -2207.45467288 A.U.**

|   |             |             |             |
|---|-------------|-------------|-------------|
| B | -0.05572900 | -0.07317500 | -0.88765900 |
| C | 1.20720200  | -0.97901800 | -0.37402500 |
| C | 1.62258700  | -0.99854900 | 0.96761000  |
| C | 1.99389300  | -1.73928600 | -1.25347500 |
| C | 2.74161300  | -1.71164700 | 1.42778800  |
| C | 3.12610200  | -2.46946600 | -0.84415900 |
| C | 3.50396700  | -2.45114400 | 0.50746100  |
| C | 0.19498900  | 1.46762400  | -0.38098500 |
| C | -0.47581400 | 2.11824200  | 0.66734600  |
| C | 1.19662600  | 2.23220600  | -1.00617200 |

|   |             |             |             |
|---|-------------|-------------|-------------|
| C | -0.20534500 | 3.44223300  | 1.05967000  |
| C | 1.50875200  | 3.55574600  | -0.64898300 |
| C | 0.79950500  | 4.16574800  | 0.39859800  |
| C | -1.53326000 | -0.65924100 | -0.50343800 |
| C | -2.67623700 | 0.05003800  | -0.91910800 |
| C | -1.80749200 | -1.86186400 | 0.16843500  |
| C | -3.99447100 | -0.37208100 | -0.68662000 |
| C | -3.11080000 | -2.33181800 | 0.42522500  |
| C | -4.21427200 | -1.57997100 | -0.00308400 |
| F | -0.88589900 | 4.01851000  | 2.07031200  |
| F | 1.07888500  | 5.43058100  | 0.76293700  |
| F | 2.47680500  | 4.24117200  | -1.28894300 |
| F | 1.92514600  | 1.69931500  | -2.01556100 |
| F | -1.44237300 | 1.48477700  | 1.37221900  |
| F | 0.91218000  | -0.32567800 | 1.90420200  |
| F | 1.68719800  | -1.81194300 | -2.56907700 |
| F | 3.85076000  | -3.18269800 | -1.72895500 |
| F | 4.58178400  | -3.14235500 | 0.92047100  |
| F | 3.09207500  | -1.70077700 | 2.72904700  |
| F | -2.53305900 | 1.22202000  | -1.58403900 |
| F | -0.80797300 | -2.66035900 | 0.61723000  |
| F | -3.30818500 | -3.49428700 | 1.07804000  |
| F | -5.46717000 | -2.01061000 | 0.23260800  |
| F | -5.04555100 | 0.35942900  | -1.10637700 |
| H | -0.01824300 | -0.04451000 | -2.12123400 |

**Al(C<sub>6</sub>F<sub>5</sub>)<sub>3</sub> (BP86-D3/Def2-SVP)**

**SCF Done: E(RB-P86) = -2424.26512387 A.U.**

|   |             |            |             |
|---|-------------|------------|-------------|
| C | 1.75234200  | 0.86865500 | 0.00000600  |
| C | 1.96857600  | 2.08611100 | 0.66591500  |
| C | 2.85186400  | 0.30264600 | -0.66567100 |
| C | 3.21675200  | 2.72976000 | 0.67938200  |
| C | 4.12029300  | 0.90538600 | -0.67912900 |
| C | 4.29459600  | 2.12764900 | 0.00012100  |
| C | -1.62855700 | 1.08339100 | -0.00021600 |
| C | -2.79167100 | 0.66041400 | 0.66368300  |
| C | -1.68815600 | 2.31925400 | -0.66471900 |

|    |             |             |             |
|----|-------------|-------------|-------------|
| C  | -3.97357000 | 1.41892900  | 0.67668000  |
| C  | -2.84479100 | 3.11575500  | -0.67862400 |
| C  | -3.99096200 | 2.65419000  | -0.00119300 |
| C  | -0.12384400 | -1.95114600 | 0.00020900  |
| C  | -1.16469200 | -2.62085100 | -0.66353900 |
| C  | 0.82403900  | -2.74670500 | 0.66432600  |
| C  | -1.27649100 | -4.02075600 | -0.67648900 |
| C  | 0.75785500  | -4.14949800 | 0.67819600  |
| C  | -0.30360800 | -4.78236800 | 0.00110400  |
| F  | -5.06746900 | 0.99788500  | 1.32022000  |
| F  | -5.10152900 | 3.39260800  | -0.00164500 |
| F  | -2.87936700 | 4.28706500  | -1.32273600 |
| F  | -0.60768600 | 2.76897100  | -1.33761300 |
| F  | -2.78896600 | -0.50981800 | 1.33671500  |
| F  | 0.95437100  | 2.66805400  | 1.34057900  |
| F  | 2.70023500  | -0.85700900 | -1.33996900 |
| F  | 5.15145600  | 0.35003100  | -1.32436000 |
| F  | 5.48971900  | 2.71952100  | 0.00014200  |
| F  | 3.39998800  | 3.88645200  | 1.32478100  |
| F  | -2.09437500 | -1.91016800 | -1.33660300 |
| F  | 1.83630700  | -2.15894100 | 1.33683100  |
| F  | 1.66947600  | -4.88610400 | 1.32193900  |
| F  | -0.38812900 | -6.11333900 | 0.00154800  |
| F  | -2.27393900 | -4.63656300 | -1.31986000 |
| Al | -0.00005100 | 0.00056100  | 0.00000000  |

**Al(C<sub>6</sub>F<sub>5</sub>)<sub>3</sub> (BP86-D3/Def2-SVP, PCM, Fluorobenzene)**

**SCF Done: E(RB-P86) = -2424.27000079 A.U.**

|   |             |             |             |
|---|-------------|-------------|-------------|
| C | -1.20418300 | 1.54301700  | -0.00019300 |
| C | -0.86906800 | 2.73736200  | -0.65807100 |
| C | -2.44418700 | 1.50761200  | 0.65754000  |
| C | -1.71546400 | 3.85760100  | -0.67156800 |
| C | -3.32621100 | 2.60000900  | 0.67011900  |
| C | -2.95109000 | 3.77980900  | -0.00080800 |
| C | 1.93907100  | 0.27138400  | 0.00058700  |
| C | 2.80615800  | -0.61586400 | -0.65689200 |
| C | 2.52777500  | 1.36315900  | 0.65841900  |

|    |             |             |             |
|----|-------------|-------------|-------------|
| C  | 4.19944800  | -0.44264200 | -0.66997000 |
| C  | 3.91477800  | 1.58097000  | 0.67177400  |
| C  | 4.74937000  | 0.66647100  | 0.00099800  |
| C  | -0.73394900 | -1.81505700 | -0.00019400 |
| C  | -0.08122700 | -2.87236700 | 0.65365300  |
| C  | -1.93841700 | -2.12064700 | -0.65386300 |
| C  | -0.58701100 | -4.18214200 | 0.66668700  |
| C  | -2.48619800 | -3.41337300 | -0.66672100 |
| C  | -1.79881800 | -4.44580000 | -0.00017000 |
| F  | 5.00473000  | -1.30072800 | -1.30870400 |
| F  | 6.07141600  | 0.85235400  | 0.00112800  |
| F  | 4.45198500  | 2.62799100  | 1.31046200  |
| F  | 1.74960200  | 2.24357200  | 1.32430900  |
| F  | 2.30115700  | -1.67640000 | -1.32339100 |
| F  | 0.30211400  | 2.83005000  | -1.32432200 |
| F  | -2.81792500 | 0.39396000  | 1.32405100  |
| F  | -4.50174300 | 2.54216300  | 1.30850700  |
| F  | -3.77286400 | 4.83198700  | -0.00119800 |
| F  | -1.37458000 | 4.98381700  | -1.31048100 |
| F  | 1.07278100  | -2.64071800 | 1.31597900  |
| F  | -2.60632300 | -1.15169000 | -1.31647400 |
| F  | -3.63455400 | -3.67977800 | -1.30157900 |
| F  | -2.29963600 | -5.68337300 | -0.00035000 |
| F  | 0.05277000  | -5.17244800 | 1.30130400  |
| Al | 0.00038200  | -0.00029400 | -0.00008500 |

**Al(C<sub>6</sub>F<sub>5</sub>)<sub>3</sub>-F (BP86-D3/Def2-SVP)**

**SCF Done: E(RB-P86) = -2524.22100771 A.U.**

|   |             |             |             |
|---|-------------|-------------|-------------|
| C | 0.99022500  | -1.63865800 | -0.33759900 |
| C | 0.55850800  | -2.89189100 | -0.78995700 |
| C | 2.08597300  | -1.65031500 | 0.53199500  |
| C | 1.16941800  | -4.10349800 | -0.42417500 |
| C | 2.73920200  | -2.83197900 | 0.93264900  |
| C | 2.27360900  | -4.06482300 | 0.44563400  |
| C | -1.91566300 | -0.03804500 | -0.33720600 |
| C | -2.78543300 | 0.96209600  | -0.78972900 |
| C | -2.47310300 | -0.98084500 | 0.53307500  |

|    |             |             |             |
|----|-------------|-------------|-------------|
| C  | -4.14003500 | 1.03882500  | -0.42336300 |
| C  | -3.82285900 | -0.95566900 | 0.93438500  |
| C  | -4.65814400 | 0.06347100  | 0.44702600  |
| C  | 0.92391500  | 1.67786800  | -0.33816800 |
| C  | 0.38632100  | 2.63419900  | 0.52979600  |
| C  | 2.22617000  | 1.92812300  | -0.78880300 |
| C  | 1.08448000  | 3.78978300  | 0.93079100  |
| C  | 2.97143200  | 3.06189800  | -0.42257000 |
| C  | 2.38598900  | 4.00054500  | 0.44547400  |
| F  | -4.94642700 | 2.01819000  | -0.88016900 |
| F  | -5.95212900 | 0.10911500  | 0.81661600  |
| F  | -4.32655200 | -1.88236500 | 1.77505600  |
| F  | -1.71803000 | -1.97746400 | 1.05603500  |
| F  | -2.32453800 | 1.92937300  | -1.61874900 |
| F  | -0.51025800 | -2.97628300 | -1.61823300 |
| F  | 2.57177300  | -0.49824600 | 1.05522100  |
| F  | 3.79396100  | -2.80509900 | 1.77288800  |
| F  | 2.88093200  | -5.20844600 | 0.81494400  |
| F  | 0.72381300  | -5.29142700 | -0.88067400 |
| F  | -0.85560400 | 2.48160600  | 1.05069500  |
| F  | 2.83334300  | 1.04298300  | -1.61537300 |
| F  | 4.22406600  | 3.26747200  | -0.87727900 |
| F  | 3.07395900  | 5.09750800  | 0.81490800  |
| F  | 0.53399300  | 4.69144900  | 1.76934700  |
| Al | -0.00089700 | 0.00041400  | -0.99940000 |
| F  | -0.00100700 | 0.00031400  | -2.71115900 |

**Al(C<sub>6</sub>F<sub>5</sub>)<sub>3</sub>-F (BP86-D3/Def2-SVP, PCM, Fluorobenzene)**

**SCF Done: E(RB-P86) = -2524.26635452 A.U.**

|   |             |             |             |
|---|-------------|-------------|-------------|
| C | -1.71967100 | 0.85805100  | 0.33883500  |
| C | -2.93154600 | 0.31607800  | 0.78420500  |
| C | -1.82599700 | 1.95349800  | -0.52526000 |
| C | -4.19106200 | 0.81669700  | 0.41634000  |
| C | -3.05902700 | 2.50008800  | -0.92824500 |
| C | -4.24754100 | 1.92396900  | -0.44875600 |
| C | 0.11442700  | -1.91013400 | 0.34275900  |
| C | 1.19042100  | -2.68536300 | 0.79333500  |

|    |             |             |             |
|----|-------------|-------------|-------------|
| C  | -0.77685300 | -2.55363100 | -0.52236800 |
| C  | 1.39105600  | -4.02664800 | 0.42843600  |
| C  | -0.62949400 | -3.89544300 | -0.92152200 |
| C  | 0.46378600  | -4.63319700 | -0.43733400 |
| C  | 1.59622200  | 1.05620200  | 0.33529500  |
| C  | 2.58094200  | 0.60642900  | -0.55123000 |
| C  | 1.75359200  | 2.36677300  | 0.80354000  |
| C  | 3.67443700  | 1.39639600  | -0.95360700 |
| C  | 2.82123800  | 3.20235400  | 0.43681900  |
| C  | 3.79146400  | 2.70319300  | -0.45070600 |
| F  | 2.44184700  | -4.73581100 | 0.88215200  |
| F  | 0.62595800  | -5.91496600 | -0.80467800 |
| F  | -1.50908300 | -4.48070900 | -1.75655100 |
| F  | -1.83911100 | -1.89063700 | -1.04392600 |
| F  | 2.11594300  | -2.13368700 | 1.61969300  |
| F  | -2.92122400 | -0.75937200 | 1.61306800  |
| F  | -0.71774300 | 2.54243500  | -1.03945300 |
| F  | -3.12094500 | 3.55482800  | -1.76347800 |
| F  | -5.43666400 | 2.42659000  | -0.81968800 |
| F  | -5.33333100 | 0.26378700  | 0.86614700  |
| F  | 2.51512100  | -0.63693800 | -1.08988100 |
| F  | 0.83202400  | 2.89310600  | 1.65035100  |
| F  | 2.93262000  | 4.45850900  | 0.90866700  |
| F  | 4.82498400  | 3.47720300  | -0.82108500 |
| F  | 4.60167800  | 0.92766800  | -1.81040900 |
| Al | -0.00449900 | 0.00318600  | 0.97919600  |
| F  | -0.00317200 | 0.00651400  | 2.70098600  |

**Al(C<sub>6</sub>F<sub>5</sub>)<sub>3</sub>-H (BP86-D3/Def2-SVP)**

**SCF Done: E(RB-P86) = -2424.96609468 A.U.**

|   |             |             |             |
|---|-------------|-------------|-------------|
| C | 1.91039600  | 0.08845900  | 0.45115500  |
| C | 2.73666800  | 1.11809200  | 0.91838500  |
| C | 2.49973300  | -0.79139800 | -0.46344800 |
| C | 4.07722200  | 1.28090900  | 0.52932400  |
| C | 3.83729100  | -0.67957300 | -0.89037200 |
| C | 4.62764200  | 0.36686800  | -0.38641300 |
| C | -1.03128300 | 1.60995500  | 0.45067400  |

|    |             |             |             |
|----|-------------|-------------|-------------|
| C  | -2.33540000 | 1.81194800  | 0.91936100  |
| C  | -0.56470600 | 2.55885600  | -0.46577500 |
| C  | -3.14667600 | 2.89139700  | 0.53003300  |
| C  | -1.33040300 | 3.66110300  | -0.89309800 |
| C  | -2.63106600 | 3.82364500  | -0.38760100 |
| C  | -0.87860300 | -1.69832700 | 0.45088900  |
| C  | -1.93581600 | -1.76850300 | -0.46310000 |
| C  | -0.39989200 | -2.92887400 | 0.91759000  |
| C  | -2.50815400 | -2.98267000 | -0.88982300 |
| C  | -0.92957900 | -4.17111600 | 0.52872600  |
| C  | -1.99693500 | -4.19049300 | -0.38636000 |
| F  | -4.39864100 | 3.04916600  | 1.00690000  |
| F  | -3.38343300 | 4.86890100  | -0.78237600 |
| F  | -0.84551400 | 4.55638700  | -1.77831400 |
| F  | 0.67275600  | 2.45236400  | -1.00884200 |
| F  | -2.87974500 | 0.92982400  | 1.79478700  |
| F  | 2.24422400  | 2.03169600  | 1.79225700  |
| F  | 1.78942000  | -1.81105400 | -1.00501600 |
| F  | 4.37097400  | -1.54848900 | -1.77379600 |
| F  | 5.90917500  | 0.49571300  | -0.78079800 |
| F  | 4.83914700  | 2.28746400  | 1.00474300  |
| F  | -2.46404600 | -0.64343300 | -1.00415000 |
| F  | 0.63827700  | -2.95947400 | 1.79056400  |
| F  | -0.43867200 | -5.33437600 | 1.00364000  |
| F  | -2.52648800 | -5.36461700 | -0.78064000 |
| F  | -3.52805300 | -3.01015600 | -1.77261200 |
| Al | 0.00021500  | -0.00005800 | 1.15780200  |
| H  | 0.00014700  | -0.00016400 | 2.77057000  |

**Al(C<sub>6</sub>F<sub>5</sub>)<sub>3</sub>-H (BP86-D3/Def2-SVP, PCM, Fluorobenzene)**

**SCF Done: E(RB-P86) = -2425.00991475 A.U.**

|   |             |            |             |
|---|-------------|------------|-------------|
| C | -0.36217000 | 1.87967400 | 0.44499300  |
| C | -1.50324000 | 2.54226200 | 0.91329400  |
| C | 0.42186700  | 2.59891100 | -0.46369200 |
| C | -1.86423800 | 3.84446400 | 0.53034400  |
| C | 0.11333000  | 3.90644600 | -0.88451200 |
| C | -1.04052700 | 4.52961500 | -0.38038700 |



|    |             |             |             |
|----|-------------|-------------|-------------|
| C  | -1.44493200 | -1.25416900 | 0.44427200  |
| C  | -1.45226900 | -2.57247500 | 0.91627300  |
| C  | -2.45600000 | -0.93506100 | -0.46908000 |
| C  | -2.40170300 | -3.53456700 | 0.53418500  |
| C  | -3.43575000 | -1.85457800 | -0.88906400 |
| C  | -3.40353100 | -3.16372900 | -0.38017100 |
| C  | 1.80905600  | -0.62575000 | 0.44457500  |
| C  | 2.03794600  | -1.65988900 | -0.46993900 |
| C  | 2.95465900  | 0.02531300  | 0.91771100  |
| C  | 3.32389600  | -2.04748800 | -0.89187300 |
| C  | 4.26236600  | -0.31425300 | 0.53355200  |
| C  | 4.44188700  | -1.36555800 | -0.38287700 |
| F  | -2.36973300 | -4.79245800 | 1.01449400  |
| F  | -4.32616300 | -4.06048200 | -0.76811400 |
| F  | -4.39378000 | -1.50714000 | -1.77013700 |
| F  | -2.53203800 | 0.30455700  | -1.01584400 |
| F  | -0.49353200 | -2.97781100 | 1.79043500  |
| F  | -2.33453500 | 1.91231100  | 1.78467400  |
| F  | 1.53858800  | 2.04958600  | -1.00441400 |
| F  | 0.89566800  | 4.56500900  | -1.76144400 |
| F  | -1.35762900 | 5.77645000  | -0.76861000 |
| F  | -2.97305500 | 4.44221600  | 1.00702400  |
| F  | 1.00227700  | -2.34523000 | -1.01683100 |
| F  | 2.82679600  | 1.05565800  | 1.79472100  |
| F  | 5.33577100  | 0.34207400  | 1.01422400  |
| F  | 5.67951700  | -1.71496000 | -0.77289100 |
| F  | 3.50128000  | -3.04946500 | -1.77471200 |
| Al | 0.00033700  | 0.00012000  | 1.12855900  |
| H  | -0.00313000 | 0.00061800  | 2.74991400  |

**HAl(C<sub>6</sub>F<sub>5</sub>)<sub>2</sub> (BP86-D3/Def2-SVP)**

**SCF Done: E(RB-P86) = -1697.55299243 A.U.**

|    |             |             |            |
|----|-------------|-------------|------------|
| Al | -0.00048100 | 1.81403600  | 0.00303800 |
| F  | -2.87646000 | 2.39398000  | 1.12487300 |
| F  | 2.90380600  | -2.41205100 | 1.51429900 |
| F  | 0.60825000  | -0.94210800 | 1.40593700 |
| F  | -5.17610400 | 0.92605500  | 0.98819000 |

|   |             |             |             |
|---|-------------|-------------|-------------|
| F | 5.17888100  | -1.47301100 | 0.32113300  |
| F | 2.87238600  | 2.39386100  | -1.12723500 |
| F | -0.60514800 | -0.94399000 | -1.39956700 |
| F | -2.89985600 | -2.41440600 | -1.51208400 |
| F | -5.17816100 | -1.47480000 | -0.32556900 |
| F | 5.17293200  | 0.92656000  | -0.99496000 |
| C | -1.66657500 | 0.77398100  | -0.13222800 |
| C | -2.86003400 | 1.21918500  | 0.46008100  |
| C | 2.88305600  | -1.23850700 | 0.87285400  |
| C | 1.66637600  | 0.77471200  | 0.13452600  |
| C | 4.05661600  | -0.75444500 | 0.26093200  |
| C | -4.05488300 | 0.48133400  | 0.40999500  |
| C | -1.71271300 | -0.46502200 | -0.79415100 |
| C | 1.71440800  | -0.46360200 | 0.79747800  |
| C | -4.05623400 | -0.75591500 | -0.26321800 |
| C | -2.88101100 | -1.24025800 | -0.87169300 |
| C | 2.85812500  | 1.21966200  | -0.46125000 |
| C | 4.05328300  | 0.48215600  | -0.41347700 |
| H | -0.00097800 | 3.39704600  | 0.00626600  |

**HAI(C<sub>6</sub>F<sub>5</sub>)<sub>2</sub> (BP86-D3/Def2-SVP, PCM, Fluorobenzene)**

**SCF Done: E(RB-P86) = -1697.55726915 A.U.**

|    |             |             |             |
|----|-------------|-------------|-------------|
| Al | -0.00038000 | 1.80022100  | 0.00250900  |
| F  | -2.88248400 | 2.41285200  | 1.09624700  |
| F  | 2.92638800  | -2.43118500 | 1.47274900  |
| F  | 0.62160000  | -0.98172800 | 1.36736200  |
| F  | -5.19001500 | 0.96279200  | 0.96445900  |
| F  | 5.20456200  | -1.45649700 | 0.31165700  |
| F  | 2.87932100  | 2.41286100  | -1.09795900 |
| F  | -0.61913200 | -0.98314100 | -1.36219900 |
| F  | -2.92329600 | -2.43294000 | -1.47114500 |
| F  | -5.20401700 | -1.45787200 | -0.31541200 |
| F  | 5.18750000  | 0.96321600  | -0.96994800 |
| C  | -1.67162300 | 0.76345900  | -0.12392800 |
| C  | -2.86640100 | 1.22622100  | 0.45082000  |
| C  | 2.90129600  | -1.24745600 | 0.84639500  |
| C  | 1.67147600  | 0.76408000  | 0.12593600  |

|   |             |             |             |
|---|-------------|-------------|-------------|
| C | 4.07532600  | -0.74608400 | 0.25205100  |
| C | -4.06682400 | 0.49823100  | 0.40161700  |
| C | -1.72530300 | -0.48304500 | -0.77016000 |
| C | 1.72664000  | -0.48194700 | 0.77287800  |
| C | -4.07504000 | -0.74722400 | -0.25397400 |
| C | -2.89969800 | -1.24878700 | -0.84554000 |
| C | 2.86490900  | 1.22666600  | -0.45163900 |
| C | 4.06555300  | 0.49890200  | -0.40441900 |
| H | -0.00076400 | 3.38381300  | 0.00487400  |

**HAl(C<sub>6</sub>F<sub>5</sub>)<sub>2</sub>-F (BP86-D3/Def2-SVP)**

**SCF Done: E(RB-P86) = -1797.49456293 A.U.**

|    |             |             |             |
|----|-------------|-------------|-------------|
| F  | -2.81301000 | 2.12903600  | 1.06123300  |
| F  | 2.45333600  | -1.46459100 | 2.65594500  |
| F  | 0.46439600  | 0.22356600  | 1.88203300  |
| F  | -4.80384300 | 0.30650600  | 1.32068400  |
| F  | 4.66976700  | -1.78917600 | 1.06888200  |
| F  | 2.90872500  | 1.26127000  | -2.08741500 |
| F  | -0.53558700 | -0.80230600 | -1.94066400 |
| F  | -2.54168100 | -2.62571400 | -1.67054200 |
| F  | -4.68187700 | -2.07333700 | -0.03783200 |
| F  | 4.88696000  | -0.42188200 | -1.29989000 |
| C  | -1.58234400 | 0.74022200  | -0.44977800 |
| C  | -2.69436300 | 0.97386800  | 0.36713800  |
| C  | 2.54577800  | -0.78799200 | 1.49113100  |
| C  | 1.59328300  | 0.80892700  | -0.14057200 |
| C  | 3.68268100  | -0.95648700 | 0.68173000  |
| C  | -3.74454900 | 0.04806200  | 0.52312200  |
| C  | -1.57285000 | -0.48798500 | -1.12066000 |
| C  | 1.53564800  | 0.09186500  | 1.06074400  |
| C  | -3.68669800 | -1.17299300 | -0.16988300 |
| C  | -2.59097300 | -1.45154300 | -1.00517300 |
| C  | 2.74536300  | 0.61201300  | -0.90976700 |
| C  | 3.78892700  | -0.25473500 | -0.53099600 |
| H  | 0.09165100  | 2.52118900  | -2.21528700 |
| Al | 0.01703200  | 2.00221200  | -0.68686400 |
| F  | -0.05524200 | 3.30892900  | 0.42115500  |

**HAl(C<sub>6</sub>F<sub>5</sub>)<sub>2</sub>-F (BP86-D3/Def2-SVP, PCM, Fluorobenzene)****SCF Done: E(RB-P86) = -1797.54585250 A.U.**

|    |             |             |             |
|----|-------------|-------------|-------------|
| F  | -2.80142500 | 2.19703000  | 0.89475500  |
| F  | 2.51147000  | -1.08647100 | 2.82717300  |
| F  | 0.51843600  | 0.51629100  | 1.89188200  |
| F  | -4.78153500 | 0.39663100  | 1.32212500  |
| F  | 4.66803600  | -1.66223100 | 1.22990600  |
| F  | 2.83847600  | 0.95777300  | -2.25680200 |
| F  | -0.54788500 | -0.95936100 | -1.88779100 |
| F  | -2.54187300 | -2.76167800 | -1.44510900 |
| F  | -4.66543900 | -2.08566700 | 0.16111500  |
| F  | 4.82260100  | -0.63475100 | -1.30794300 |
| C  | -1.58604200 | 0.69185900  | -0.51330400 |
| C  | -2.69006200 | 0.98698000  | 0.29391700  |
| C  | 2.57630700  | -0.57795500 | 1.58138600  |
| C  | 1.59279200  | 0.79975900  | -0.22154600 |
| C  | 3.68293400  | -0.87448800 | 0.76609600  |
| C  | -3.73439600 | 0.07499500  | 0.53723400  |
| C  | -1.57959400 | -0.58698800 | -1.08234100 |
| C  | 1.56524900  | 0.25231200  | 1.06672200  |
| C  | -3.67901500 | -1.19841700 | -0.05494300 |
| C  | -2.59106800 | -1.54110400 | -0.87698900 |
| C  | 2.71426800  | 0.47884500  | -0.99391700 |
| C  | 3.75805900  | -0.34590800 | -0.53416400 |
| H  | 0.08239400  | 2.31710300  | -2.42971700 |
| Al | 0.01045200  | 1.91040000  | -0.86142400 |
| F  | -0.06473600 | 3.33225200  | 0.10616900  |

**HAl(C<sub>6</sub>F<sub>5</sub>)<sub>2</sub>-H (BP86-D3/Def2-SVP)****SCF Done: E(RB-P86) = -1698.24177470 A.U.**

|    |             |             |             |
|----|-------------|-------------|-------------|
| Al | -0.00013600 | 2.26282500  | -0.09227400 |
| F  | -2.81666800 | 1.91280900  | 1.62838200  |
| F  | 2.55468900  | -1.80460100 | 2.37618300  |
| F  | 0.55368400  | 0.00695500  | 2.03875600  |
| F  | -4.80428700 | 0.07956000  | 1.42683200  |
| F  | 4.68617500  | -1.83204900 | 0.64329400  |
| F  | 2.81555900  | 1.77322000  | -1.77965200 |

|   |             |             |             |
|---|-------------|-------------|-------------|
| F | -0.55284300 | -0.16003700 | -2.03143500 |
| F | -2.55351800 | -1.99340300 | -2.22026500 |
| F | -4.68593100 | -1.87894300 | -0.49206600 |
| F | 4.80335500  | -0.03736900 | -1.42971300 |
| C | -1.59076900 | 0.95673500  | -0.19206200 |
| C | -2.70033600 | 0.97134000  | 0.66120900  |
| C | 2.60081600  | -0.91749000 | 1.35848300  |
| C | 1.59067000  | 0.96944900  | 0.11364000  |
| C | 3.69282400  | -0.93546500 | 0.47365700  |
| C | -3.74877100 | 0.03385100  | 0.58412500  |
| C | -1.58262600 | -0.06253600 | -1.15231800 |
| C | 1.58307600  | 0.03224200  | 1.15414600  |
| C | -3.69270400 | -0.97139200 | -0.39594800 |
| C | -2.60022300 | -1.02589900 | -1.27869200 |
| C | 2.69978600  | 0.91412500  | -0.73855600 |
| C | 3.74830400  | -0.01389500 | -0.58550900 |
| H | 0.06887000  | 3.08521400  | -1.48841200 |
| H | -0.06932000 | 3.19639400  | 1.23207400  |

**HAl(C<sub>6</sub>F<sub>5</sub>)<sub>2</sub>-H (BP86-D3/Def2-SVP, PCM, Fluorobenzene)**

**SCF Done: E(RB-P86) = -1698.29223129 A.U.**

|    |             |             |             |
|----|-------------|-------------|-------------|
| Al | 0.00819200  | -0.16311200 | -2.24889900 |
| F  | -2.69572500 | 1.71664500  | -1.83875300 |
| F  | 2.58491700  | 2.49451900  | 1.64705900  |
| F  | 0.59546000  | 2.08843500  | -0.16357400 |
| F  | -4.67948900 | 1.56569700  | 0.00170200  |
| F  | 4.65780900  | 0.70194900  | 1.83159200  |
| F  | 2.75619300  | -1.91443200 | -1.61781000 |
| F  | -0.64996600 | -2.15376400 | 0.07009600  |
| F  | -2.64379500 | -2.28599000 | 1.91701900  |
| F  | -4.66616100 | -0.42811900 | 1.88615700  |
| F  | 4.72891400  | -1.49813900 | 0.19341400  |
| C  | -1.58684100 | -0.21689600 | -0.96650000 |
| C  | -2.63985400 | 0.70469900  | -0.93686000 |
| C  | 2.61303800  | 1.41707500  | 0.83832500  |
| C  | 1.59106200  | 0.07422100  | -0.97313200 |
| C  | 3.67505300  | 0.50085900  | 0.93662300  |

|   |             |             |             |
|---|-------------|-------------|-------------|
| C | -3.68296600 | 0.65824100  | 0.00721200  |
| C | -1.62959800 | -1.21197500 | 0.01794700  |
| C | 1.60292600  | 1.17659300  | -0.10962100 |
| C | -3.67971700 | -0.36065700 | 0.97529100  |
| C | -2.64347300 | -1.31074400 | 0.98708000  |
| C | 2.66848900  | -0.80860700 | -0.83668400 |
| C | 3.70810000  | -0.62375500 | 0.09424100  |
| H | 0.07942700  | -1.57211800 | -3.05929800 |
| H | -0.05665400 | 1.11705500  | -3.25067100 |

**J (BP86-D3/Def2-SVP)**

**SCF Done: E(RB-P86) = -1324.21400979 A.U.**

|    |             |             |             |
|----|-------------|-------------|-------------|
| Al | 0.00030900  | -0.26130800 | 0.00000900  |
| C  | 1.76508400  | -1.07994200 | 0.01642000  |
| C  | 2.17184400  | -1.89409500 | -1.08117700 |
| C  | 2.65846500  | -0.88567000 | 1.10498200  |
| C  | 3.44908900  | -2.47751600 | -1.07813400 |
| C  | 3.93430500  | -1.48208600 | 1.07703900  |
| C  | 4.34834600  | -2.28204400 | -0.00579200 |
| H  | 3.76027300  | -3.10232100 | -1.93209400 |
| H  | 4.62334700  | -1.32974800 | 1.92477500  |
| C  | -1.76377000 | -1.08143700 | -0.01653900 |
| C  | -2.65718400 | -0.88835600 | -1.10532300 |
| C  | -2.17017500 | -1.89500700 | 1.08157100  |
| C  | -3.93267100 | -1.48541900 | -1.07707300 |
| C  | -3.44714100 | -2.47914200 | 1.07882600  |
| C  | -4.34636700 | -2.28492600 | 0.00628100  |
| H  | -4.62174600 | -1.33396300 | -1.92494400 |
| H  | -3.75811000 | -3.10345400 | 1.93322400  |
| C  | -0.00079600 | 1.76508700  | -0.00004800 |
| N  | -1.02799700 | 2.60050400  | 0.35098200  |
| N  | 1.02546400  | 2.60160200  | -0.35119700 |
| C  | -0.65858800 | 3.93644000  | 0.22620800  |
| C  | -2.34824200 | 2.17574400  | 0.81776400  |
| C  | 0.65456300  | 3.93714200  | -0.22664400 |
| C  | 2.34614800  | 2.17819400  | -0.81796300 |
| H  | -2.40585700 | 1.07175400  | 0.79317700  |

|   |             |             |             |
|---|-------------|-------------|-------------|
| H | 2.40519200  | 1.07429300  | -0.79254000 |
| C | 1.57274500  | 5.06665500  | -0.54915600 |
| H | 2.48416300  | 5.05016200  | 0.08476800  |
| H | 1.90311000  | 5.03817600  | -1.60881400 |
| H | 1.06601500  | 6.03496800  | -0.38232900 |
| C | -1.57797800 | 5.06498100  | 0.54868000  |
| H | -2.49011200 | 5.04658300  | -0.08414400 |
| H | -1.90705800 | 5.03708300  | 1.60876400  |
| H | -1.07279600 | 6.03383800  | 0.38032300  |
| C | -2.23510500 | -0.08508300 | -2.31738900 |
| H | -1.37993500 | 0.59442000  | -2.09368000 |
| H | -1.90886900 | -0.74861800 | -3.14756000 |
| H | -3.05761600 | 0.54470400  | -2.71407700 |
| C | -1.23540600 | -2.09172200 | 2.25767300  |
| H | -0.19237800 | -2.28387500 | 1.91923900  |
| H | -1.21629400 | -1.19582700 | 2.91887300  |
| H | -1.53492200 | -2.94858100 | 2.89244700  |
| C | -5.70370900 | -2.94354600 | 0.01792500  |
| H | -6.20539400 | -2.82127800 | 0.99978600  |
| H | -6.36840900 | -2.53282700 | -0.76679700 |
| H | -5.61056000 | -4.03680500 | -0.16000800 |
| C | 2.23624900  | -0.08179300 | 2.31660600  |
| H | 1.37897000  | 0.59520000  | 2.09338600  |
| H | 1.91311000  | -0.74497700 | 3.14825900  |
| H | 3.05779500  | 0.55067800  | 2.71105500  |
| C | 1.23683900  | -2.09244300 | -2.25682100 |
| H | 0.19480400  | -2.28878700 | -1.91778300 |
| H | 1.21396000  | -1.19561800 | -2.91664900 |
| H | 1.53893700  | -2.94725300 | -2.89312000 |
| C | 5.70624900  | -2.93950400 | -0.01758300 |
| H | 6.21083000  | -2.81000700 | -0.99707800 |
| H | 6.36821300  | -2.53344800 | 0.77184300  |
| H | 5.61357900  | -4.03404000 | 0.15238300  |
| H | 2.51826400  | 2.53975200  | -1.85059000 |
| H | 3.13112200  | 2.59056000  | -0.15493900 |

|   |             |            |            |
|---|-------------|------------|------------|
| H | -2.52107400 | 2.53793600 | 1.85004300 |
| H | -3.13360200 | 2.58651100 | 0.15419700 |

**J (BP86-D3/Def2-SVP, PCM, Fluorobenzene)**

**SCF Done: E(RB-P86) = -1324.26106902 A.U.**

|    |             |             |             |
|----|-------------|-------------|-------------|
| Al | 0.00005300  | -0.22728700 | -0.00007800 |
| C  | 1.75588000  | -1.07776800 | 0.02061400  |
| C  | 2.16119000  | -1.90174100 | -1.07048000 |
| C  | 2.64412500  | -0.88798200 | 1.11299900  |
| C  | 3.43019200  | -2.50406700 | -1.05502100 |
| C  | 3.91313300  | -1.50334400 | 1.09806700  |
| C  | 4.32397300  | -2.31432800 | 0.02344300  |
| H  | 3.73901000  | -3.13690700 | -1.90425700 |
| H  | 4.59818500  | -1.35219100 | 1.94944500  |
| C  | -1.75558500 | -1.07814900 | -0.02077900 |
| C  | -2.64401800 | -0.88842800 | -1.11303500 |
| C  | -2.16065800 | -1.90215600 | 1.07036600  |
| C  | -3.91296000 | -1.50389500 | -1.09791300 |
| C  | -3.42960500 | -2.50462500 | 1.05507700  |
| C  | -4.32355200 | -2.31497500 | -0.02325200 |
| H  | -4.59818100 | -1.35272100 | -1.94914900 |
| H  | -3.73825000 | -3.13748000 | 1.90436500  |
| C  | -0.00019100 | 1.78345100  | -0.00005000 |
| N  | -1.00713000 | 2.61683300  | 0.40554200  |
| N  | 1.00655900  | 2.61709500  | -0.40556300 |
| C  | -0.64436300 | 3.95095700  | 0.26146300  |
| C  | -2.29802600 | 2.19020900  | 0.94446300  |
| C  | 0.64348100  | 3.95112400  | -0.26140000 |
| C  | 2.29756300  | 2.19080900  | -0.94449100 |
| H  | -2.35383800 | 1.08697300  | 0.92412000  |
| H  | 2.35365100  | 1.08758400  | -0.92416600 |
| C  | 1.54316200  | 5.07880800  | -0.63469000 |
| H  | 2.48974300  | 5.05536700  | -0.05542800 |
| H  | 1.81040100  | 5.04743300  | -1.71163300 |
| H  | 1.04821800  | 6.04697800  | -0.43664800 |
| C  | -1.54428900 | 5.07841400  | 0.63484700  |
| H  | -2.49095000 | 5.05471400  | 0.05572600  |



|   |             |             |             |
|---|-------------|-------------|-------------|
| H | -1.81135700 | 5.04701300  | 1.71183200  |
| H | -1.04962500 | 6.04670600  | 0.43669800  |
| C | -2.23205000 | -0.06605000 | -2.31534000 |
| H | -1.35937500 | 0.59105800  | -2.09828400 |
| H | -1.93974700 | -0.71732400 | -3.16728800 |
| H | -3.05167900 | 0.58949500  | -2.67418700 |
| C | -1.23515300 | -2.08903200 | 2.25480100  |
| H | -0.18977000 | -2.28324100 | 1.92626600  |
| H | -1.21796200 | -1.18342200 | 2.90210200  |
| H | -1.54225700 | -2.93799700 | 2.89663300  |
| C | -5.67792400 | -2.98261100 | -0.01862600 |
| H | -6.22956100 | -2.76835300 | 0.92066900  |
| H | -6.30218900 | -2.65045200 | -0.87106900 |
| H | -5.57562600 | -4.08729900 | -0.08247100 |
| C | 2.23192300  | -0.06570500 | 2.31529500  |
| H | 1.35872300  | 0.59075700  | 2.09838900  |
| H | 1.94035000  | -0.71701900 | 3.16745900  |
| H | 3.05119100  | 0.59050900  | 2.67375600  |
| C | 1.23579900  | -2.08880600 | -2.25497200 |
| H | 0.19052400  | -2.28366500 | -1.92648300 |
| H | 1.21811400  | -1.18303100 | -2.90203000 |
| H | 1.54337200  | -2.93743200 | -2.89702700 |
| C | 5.67856500  | -2.98151400 | 0.01877100  |
| H | 6.23200100  | -2.76300800 | -0.91851100 |
| H | 6.30103800  | -2.65262400 | 0.87378200  |
| H | 5.57660700  | -4.08648900 | 0.07764600  |
| H | 2.41176500  | 2.55100800  | -1.98493200 |
| H | 3.11790400  | 2.60058500  | -0.32491600 |
| H | -2.41231700 | 2.55036000  | 1.98491000  |
| H | -3.11847600 | 2.59978100  | 0.32489800  |

**J-F (BP86-D3/Def2-SVP)**

**SCF Done: E(RB-P86) = -1424.25153290 A.U.**

|    |             |             |             |
|----|-------------|-------------|-------------|
| Al | 0.04078200  | -0.25869300 | 0.85592500  |
| C  | -1.63524700 | -1.11825200 | 0.16640000  |
| C  | -2.08007000 | -2.28998600 | 0.85303900  |
| C  | -2.41287500 | -0.67759500 | -0.94002800 |

|   |             |             |             |
|---|-------------|-------------|-------------|
| C | -3.26036100 | -2.95145300 | 0.46397000  |
| C | -3.59410600 | -1.35827400 | -1.30937800 |
| C | -4.04369300 | -2.49327300 | -0.61331800 |
| H | -3.57443100 | -3.85824200 | 1.01049600  |
| H | -4.17556200 | -0.99854800 | -2.17674200 |
| C | 1.83094400  | -0.96679600 | 0.30632900  |
| C | 3.00224800  | -0.45071700 | 0.94141100  |
| C | 2.01610200  | -1.92743200 | -0.73303900 |
| C | 4.28522100  | -0.88804700 | 0.55472500  |
| C | 3.31290400  | -2.34350100 | -1.10095900 |
| C | 4.46361000  | -1.84024400 | -0.46603600 |
| H | 5.17285600  | -0.47327200 | 1.06427900  |
| H | 3.42890100  | -3.08686400 | -1.90914500 |
| C | -0.03606400 | 1.73683400  | 0.31022600  |
| N | 0.62470500  | 2.43408100  | -0.65820700 |
| N | -0.96863700 | 2.60998700  | 0.78808400  |
| C | 0.10456700  | 3.72346100  | -0.80749300 |
| C | 1.70339900  | 1.89141000  | -1.47653700 |
| C | -0.91877700 | 3.83479400  | 0.11730300  |
| C | -1.95052200 | 2.25581200  | 1.81212700  |
| H | 1.92907400  | 0.86558700  | -1.12614400 |
| H | -1.54086900 | 1.40976300  | 2.39763300  |
| C | -1.83404300 | 4.97122900  | 0.42862800  |
| H | -2.90068700 | 4.68524000  | 0.31122000  |
| H | -1.70163300 | 5.33834500  | 1.46916000  |
| H | -1.63731400 | 5.82114600  | -0.25202100 |
| C | 0.64267900  | 4.70161900  | -1.79696500 |
| H | 1.70982100  | 4.94304000  | -1.60293700 |
| H | 0.57584000  | 4.31672400  | -2.83686000 |
| H | 0.07229900  | 5.64867500  | -1.75278000 |
| C | 2.89151500  | 0.61207700  | 2.01756700  |
| H | 2.56358000  | 1.58557000  | 1.58647700  |
| H | 2.13154900  | 0.34500400  | 2.77887600  |
| H | 3.86233700  | 0.78728000  | 2.52299100  |
| C | 0.83660700  | -2.52140500 | -1.47790500 |

|   |             |             |             |
|---|-------------|-------------|-------------|
| H | 0.14971600  | -3.06597400 | -0.79846500 |
| H | 0.21368900  | -1.74072500 | -1.96210300 |
| H | 1.16972600  | -3.22652300 | -2.26593300 |
| C | 5.84184700  | -2.33148200 | -0.84480900 |
| H | 6.61717700  | -1.55948000 | -0.66173900 |
| H | 6.12567900  | -3.22566000 | -0.24634100 |
| H | 5.89229800  | -2.62754200 | -1.91275800 |
| C | -1.99702600 | 0.51262700  | -1.78684900 |
| H | -2.19307100 | 1.48300500  | -1.28106200 |
| H | -0.91321900 | 0.48780000  | -2.02288400 |
| H | -2.54691300 | 0.53304200  | -2.74964400 |
| C | -1.25908900 | -2.86245300 | 1.99239100  |
| H | -0.21440400 | -3.06790600 | 1.66610100  |
| H | -1.17847300 | -2.14571000 | 2.83517700  |
| H | -1.68417600 | -3.81318300 | 2.37129000  |
| C | -5.31795900 | -3.20634700 | -1.00408100 |
| H | -6.10794000 | -3.07415700 | -0.23241700 |
| H | -5.72204500 | -2.82569100 | -1.96381600 |
| H | -5.15664800 | -4.30006800 | -1.11075500 |
| H | -2.12311700 | 3.12026200  | 2.48059400  |
| H | -2.90836500 | 1.95314600  | 1.34160600  |
| H | 1.40031800  | 1.86070700  | -2.54267300 |
| H | 2.61486500  | 2.51339400  | -1.37699900 |
| F | -0.11381900 | -0.06992100 | 2.58575800  |

**J-F (BP86-D3/Def2-SVP, PCM, Fluorobenzene)**

**SCF Done: E(RB-P86) = -1424.26327442 A.U.**

|    |             |             |             |
|----|-------------|-------------|-------------|
| Al | 0.02581200  | -0.19988000 | 0.83979600  |
| C  | -1.63121900 | -1.13290400 | 0.19138800  |
| C  | -1.97132400 | -2.35941100 | 0.84166400  |
| C  | -2.47760200 | -0.70333100 | -0.86975500 |
| C  | -3.11434000 | -3.09067000 | 0.46102800  |
| C  | -3.61926300 | -1.45368000 | -1.23122700 |
| C  | -3.96392800 | -2.64766200 | -0.57219000 |
| H  | -3.34513500 | -4.03898500 | 0.97803200  |
| H  | -4.25477000 | -1.10001600 | -2.06236400 |
| C  | 1.81492000  | -0.92807000 | 0.28797900  |

|   |             |             |             |
|---|-------------|-------------|-------------|
| C | 2.99195400  | -0.42864400 | 0.92721200  |
| C | 1.99455200  | -1.89168300 | -0.75018500 |
| C | 4.27073500  | -0.89367200 | 0.55682700  |
| C | 3.28717400  | -2.33738800 | -1.10217700 |
| C | 4.44183500  | -1.85747900 | -0.45551500 |
| H | 5.16128600  | -0.48815200 | 1.06877900  |
| H | 3.39693300  | -3.08150000 | -1.91065500 |
| C | -0.06387900 | 1.78527000  | 0.29606400  |
| N | 0.56200400  | 2.45655300  | -0.71364900 |
| N | -0.95606600 | 2.68382200  | 0.80538900  |
| C | 0.06052700  | 3.75337200  | -0.85618500 |
| C | 1.59646600  | 1.89192100  | -1.57367000 |
| C | -0.91436100 | 3.89816900  | 0.11603000  |
| C | -1.89317300 | 2.37955900  | 1.88460700  |
| H | 1.83023800  | 0.87070200  | -1.21936900 |
| H | -1.51642200 | 1.49222000  | 2.42620000  |
| C | -1.79000800 | 5.05620600  | 0.45752500  |
| H | -2.86583700 | 4.78831000  | 0.39994900  |
| H | -1.59539200 | 5.43197100  | 1.48470300  |
| H | -1.61123500 | 5.89167600  | -0.24483700 |
| C | 0.56797300  | 4.70627000  | -1.88508500 |
| H | 1.64703200  | 4.92878100  | -1.74394000 |
| H | 0.44501700  | 4.30463000  | -2.91302700 |
| H | 0.01655300  | 5.66334700  | -1.82782800 |
| C | 2.89394200  | 0.65055600  | 1.98826700  |
| H | 2.52680300  | 1.60571000  | 1.54980100  |
| H | 2.16649000  | 0.37976100  | 2.77945700  |
| H | 3.87638900  | 0.85634900  | 2.45814200  |
| C | 0.81516000  | -2.45179500 | -1.52154200 |
| H | 0.12530300  | -3.02312000 | -0.86733000 |
| H | 0.19773900  | -1.64725800 | -1.97237800 |
| H | 1.14914800  | -3.12376800 | -2.33771100 |
| C | 5.81470500  | -2.37579000 | -0.81808800 |
| H | 6.59724500  | -1.60445900 | -0.66569000 |
| H | 6.09265200  | -3.24811400 | -0.18563300 |

|   |             |             |             |
|---|-------------|-------------|-------------|
| H | 5.85926600  | -2.71375000 | -1.87352700 |
| C | -2.17843700 | 0.54981400  | -1.67298700 |
| H | -2.35810800 | 1.47655500  | -1.08796700 |
| H | -1.11961400 | 0.58285700  | -2.00248700 |
| H | -2.81263000 | 0.60803400  | -2.58045400 |
| C | -1.07884100 | -2.91763200 | 1.93434400  |
| H | -0.02742600 | -3.01239900 | 1.58060900  |
| H | -1.04312200 | -2.24190400 | 2.81339700  |
| H | -1.41327200 | -3.91941800 | 2.27009300  |
| C | -5.20268000 | -3.42783400 | -0.94967500 |
| H | -6.01732000 | -3.27359400 | -0.20785500 |
| H | -5.59501700 | -3.11884400 | -1.93956200 |
| H | -5.00392900 | -4.51950700 | -0.98186000 |
| H | -1.95349700 | 3.23598500  | 2.58208800  |
| H | -2.90276500 | 2.17280900  | 1.47516800  |
| H | 1.24420900  | 1.85084500  | -2.62357500 |
| H | 2.51449300  | 2.50952200  | -1.52604900 |
| F | -0.09930600 | -0.05782500 | 2.58224700  |

**J-H (BP86-D3/Def2-SVP)**

**SCF Done: E(RB-P86) = -1324.99228466 A.U.**

|    |             |             |             |
|----|-------------|-------------|-------------|
| Al | 0.12717600  | -0.30494900 | 1.00557700  |
| C  | -1.50062100 | -1.24042900 | 0.25737100  |
| C  | -2.05491700 | -2.32690200 | 1.00220800  |
| C  | -2.17350400 | -0.86644800 | -0.94024600 |
| C  | -3.23812500 | -2.96444000 | 0.58185100  |
| C  | -3.36027600 | -1.52117800 | -1.33926300 |
| C  | -3.91874400 | -2.56710500 | -0.58571100 |
| H  | -3.63719600 | -3.80531400 | 1.17644500  |
| H  | -3.85646500 | -1.21538400 | -2.27761800 |
| C  | 1.97152100  | -0.84976000 | 0.40893500  |
| C  | 3.10183500  | -0.21887200 | 1.01445200  |
| C  | 2.22961800  | -1.82532300 | -0.60050400 |
| C  | 4.41401400  | -0.54202300 | 0.61178700  |
| C  | 3.55331900  | -2.12725400 | -0.98374000 |
| C  | 4.66324200  | -1.49692600 | -0.39082400 |
| H  | 5.26739900  | -0.03490700 | 1.09576600  |

|   |             |             |             |
|---|-------------|-------------|-------------|
| H | 3.72419800  | -2.88232100 | -1.77120100 |
| C | -0.17741000 | 1.66406200  | 0.43559500  |
| N | 0.46194800  | 2.49360900  | -0.43950500 |
| N | -1.28206200 | 2.36555000  | 0.82611600  |
| C | -0.23539200 | 3.69406200  | -0.61412800 |
| C | 1.67711200  | 2.14729800  | -1.16703800 |
| C | -1.35506200 | 3.61017300  | 0.19341900  |
| C | -2.30372300 | 1.81806500  | 1.71352100  |
| H | 1.98636400  | 1.12649100  | -0.87093000 |
| H | -1.82747000 | 1.04750000  | 2.35151000  |
| C | -2.46740900 | 4.57777900  | 0.42338800  |
| H | -3.45589000 | 4.13596700  | 0.17570600  |
| H | -2.51153600 | 4.91862900  | 1.48031800  |
| H | -2.33296400 | 5.47515600  | -0.20990700 |
| C | 0.24260400  | 4.78091400  | -1.51733300 |
| H | 1.23847800  | 5.16658000  | -1.21046000 |
| H | 0.33374100  | 4.43504300  | -2.56916600 |
| H | -0.46423000 | 5.63211600  | -1.50493600 |
| C | 2.91490400  | 0.83238000  | 2.09062500  |
| H | 2.38317700  | 1.73023100  | 1.70322800  |
| H | 2.28841100  | 0.45034200  | 2.92360800  |
| H | 3.88489500  | 1.17314500  | 2.50510500  |
| C | 1.10016200  | -2.56335400 | -1.29132900 |
| H | 0.44989600  | -3.09354000 | -0.56605700 |
| H | 0.42761100  | -1.87266800 | -1.84061000 |
| H | 1.48682700  | -3.30791100 | -2.01620300 |
| C | 6.07397300  | -1.86278800 | -0.79179800 |
| H | 6.78596100  | -1.03777100 | -0.58505000 |
| H | 6.43276700  | -2.75275800 | -0.22830900 |
| H | 6.14072800  | -2.11575100 | -1.87013900 |
| C | -1.63860700 | 0.22230900  | -1.85404700 |
| H | -1.95829400 | 1.23942700  | -1.53581700 |
| H | -0.53019800 | 0.22501400  | -1.87942200 |
| H | -1.99878800 | 0.08497300  | -2.89422900 |
| C | -1.36280600 | -2.83558000 | 2.25193700  |

|   |             |             |             |
|---|-------------|-------------|-------------|
| H | -0.28211900 | -3.02461400 | 2.07011800  |
| H | -1.40648800 | -2.09275800 | 3.07648600  |
| H | -1.81381600 | -3.78182400 | 2.61302900  |
| C | -5.18911000 | -3.26356500 | -1.01754900 |
| H | -5.98936200 | -3.15991200 | -0.25292500 |
| H | -5.57766000 | -2.85110300 | -1.97047000 |
| H | -5.02626100 | -4.35341500 | -1.16173500 |
| H | -2.72025200 | 2.62094800  | 2.35034300  |
| H | -3.11471100 | 1.34054700  | 1.12693000  |
| H | 1.48867900  | 2.17118400  | -2.25927800 |
| H | 2.49339600  | 2.85696900  | -0.92543100 |
| H | -0.02091700 | -0.14865900 | 2.62305100  |

**J-H (BP86-D3/Def2-SVP, PCM, Fluorobenzene)**

**SCF Done: E(RB-P86) = -1325.00294447 A.U.**

|    |             |             |             |
|----|-------------|-------------|-------------|
| Al | 0.03054900  | -0.19864400 | 0.96399200  |
| C  | -1.62154100 | -1.14604400 | 0.29119100  |
| C  | -1.98822900 | -2.35360900 | 0.96192300  |
| C  | -2.44371400 | -0.73403500 | -0.79698400 |
| C  | -3.13285900 | -3.08149300 | 0.57722100  |
| C  | -3.58703500 | -1.48014000 | -1.16157600 |
| C  | -3.95893500 | -2.65373000 | -0.48061200 |
| H  | -3.38231000 | -4.01628700 | 1.11012500  |
| H  | -4.20083600 | -1.14143500 | -2.01513100 |
| C  | 1.82773600  | -0.91277800 | 0.37591900  |
| C  | 3.00799500  | -0.40554200 | 1.00373800  |
| C  | 2.00497500  | -1.89568100 | -0.64472700 |
| C  | 4.28611800  | -0.87660900 | 0.63701000  |
| C  | 3.29678700  | -2.34716400 | -0.99318900 |
| C  | 4.45425200  | -1.85686900 | -0.35944400 |
| H  | 5.17814700  | -0.46236500 | 1.13945200  |
| H  | 3.40355800  | -3.10473600 | -1.78962700 |
| C  | -0.09691900 | 1.77655200  | 0.38149900  |
| N  | 0.56395700  | 2.47684900  | -0.58610100 |
| N  | -1.02267900 | 2.65595000  | 0.86710200  |
| C  | 0.05440500  | 3.77201500  | -0.72348600 |
| C  | 1.63211600  | 1.93903800  | -1.42113100 |

|   |             |             |             |
|---|-------------|-------------|-------------|
| C | -0.96404100 | 3.88613800  | 0.20597800  |
| C | -2.00903300 | 2.31945600  | 1.88796400  |
| H | 1.84689200  | 0.90473900  | -1.09374000 |
| H | -1.67075100 | 1.40223600  | 2.40664700  |
| C | -1.86958000 | 5.02595200  | 0.53064600  |
| H | -2.93817200 | 4.74802700  | 0.41357900  |
| H | -1.73073600 | 5.37947500  | 1.57463000  |
| H | -1.66656200 | 5.88006500  | -0.14217800 |
| C | 0.59406600  | 4.75050500  | -1.71117800 |
| H | 1.66457300  | 4.97885100  | -1.52214900 |
| H | 0.51656500  | 4.36970700  | -2.75149800 |
| H | 0.03186300  | 5.70149400  | -1.65688200 |
| C | 2.91671300  | 0.68580000  | 2.05186000  |
| H | 2.50696300  | 1.62641300  | 1.62093300  |
| H | 2.22570800  | 0.40319700  | 2.87345000  |
| H | 3.90780100  | 0.92219500  | 2.48821600  |
| C | 0.82430800  | -2.47075900 | -1.40214300 |
| H | 0.13926000  | -3.03439500 | -0.73606800 |
| H | 0.20203000  | -1.67363800 | -1.85878100 |
| H | 1.15640000  | -3.15340400 | -2.21035600 |
| C | 5.82580900  | -2.38128100 | -0.71887300 |
| H | 6.61085800  | -1.61194800 | -0.56926300 |
| H | 6.10085100  | -3.25243100 | -0.08343300 |
| H | 5.87012100  | -2.72336500 | -1.77309500 |
| C | -2.11188500 | 0.49053100  | -1.63036400 |
| H | -2.32433200 | 1.43776400  | -1.09045700 |
| H | -1.03763100 | 0.51770100  | -1.90566400 |
| H | -2.70140200 | 0.51092200  | -2.56923500 |
| C | -1.12777000 | -2.89875700 | 2.08620000  |
| H | -0.05599600 | -2.94841800 | 1.79121400  |
| H | -1.16821800 | -2.24700000 | 2.98511100  |
| H | -1.44191600 | -3.91860300 | 2.38649700  |
| C | -5.20085100 | -3.42695400 | -0.86243700 |
| H | -6.04216300 | -3.20674200 | -0.16828300 |
| H | -5.54384300 | -3.17099100 | -1.88539400 |



|   |             |             |             |
|---|-------------|-------------|-------------|
| H | -5.02992800 | -4.52278700 | -0.81893300 |
| H | -2.09362100 | 3.14334200  | 2.62155900  |
| H | -3.00102100 | 2.13722300  | 1.42726500  |
| H | 1.32269100  | 1.93621200  | -2.48526400 |
| H | 2.54962300  | 2.55041200  | -1.31499800 |
| H | -0.06788100 | -0.05591200 | 2.59280300  |

**F (BP86-D3/Def2-SVP)**

**SCF Done: E(RB-P86) = -1756.41448785 A.U.**

|    |             |             |             |
|----|-------------|-------------|-------------|
| Al | 0.00210400  | 0.00447000  | -0.90910000 |
| N  | 1.44804100  | -0.05833300 | 0.25997900  |
| N  | -1.45011600 | 0.06046700  | 0.25343200  |
| C  | -1.29579500 | 0.08722300  | 1.60958000  |
| C  | -2.68042200 | -0.16371300 | -0.48938400 |
| C  | 1.29180500  | -0.05292100 | 1.61590000  |
| C  | 2.67265700  | 0.14966100  | -0.49757500 |
| C  | 2.49685300  | -0.15718500 | 2.59618600  |
| C  | -0.00281300 | 0.02620600  | 2.18297400  |
| C  | -2.50455300 | 0.20440500  | 2.58372800  |
| C  | -2.05000400 | 0.42957800  | 4.04535400  |
| C  | -3.38008100 | 1.41444800  | 2.18545600  |
| C  | -3.37644500 | -1.07794500 | 2.57210700  |
| C  | 2.03689200  | -0.34863600 | 4.06067400  |
| C  | 3.36317400  | -1.38037900 | 2.22203500  |
| C  | 3.38383900  | 1.11405700  | 2.56048200  |
| H  | -0.00474000 | 0.03992000  | 3.26942600  |
| C  | -0.00660000 | 0.01148800  | -2.84749300 |
| H  | -1.03541700 | -0.15473100 | -3.22661100 |
| H  | 0.36653000  | 0.97580300  | -3.24673700 |
| H  | 0.64954600  | -0.78053200 | -3.25834900 |
| C  | 3.05066400  | 1.50362700  | -0.74456100 |
| C  | 4.13496300  | 1.74077700  | -1.60934100 |
| C  | 4.80981900  | 0.68013300  | -2.23121200 |
| C  | 3.32558600  | -0.93886800 | -1.14052900 |
| C  | 4.40432600  | -0.63860200 | -1.99917700 |
| C  | 2.27802600  | 2.67222800  | -0.12459900 |
| H  | 4.45561600  | 2.77386800  | -1.80593700 |

|   |             |             |             |
|---|-------------|-------------|-------------|
| H | 5.65466100  | 0.88625000  | -2.90578500 |
| C | 2.90841000  | -2.40018300 | -0.96003600 |
| H | 4.93557500  | -1.46281400 | -2.49901000 |
| C | -3.34206300 | 0.91349200  | -1.13970700 |
| C | -4.44553000 | 0.60347800  | -1.96236500 |
| C | -4.86462200 | -0.71777100 | -2.15475300 |
| C | -3.06469400 | -1.51981500 | -0.70608500 |
| C | -4.17344200 | -1.76968400 | -1.53565100 |
| C | -2.88601100 | 2.36787300  | -1.02099700 |
| H | -4.98413800 | 1.42044600  | -2.46603500 |
| H | -5.73017800 | -0.93296100 | -2.79959200 |
| C | -2.26101000 | -2.67598900 | -0.10584400 |
| H | -4.50003500 | -2.80543700 | -1.70698200 |
| H | 2.93543900  | -0.47744100 | 4.69559500  |
| H | 1.48778600  | 0.52917700  | 4.45638200  |
| H | 1.40829600  | -1.25238600 | 4.19078800  |
| H | 4.13698100  | -1.52992300 | 3.00139900  |
| H | 2.76013000  | -2.30855600 | 2.16103500  |
| H | 3.88590900  | -1.22829600 | 1.26318800  |
| H | 4.18145400  | 1.00723100  | 3.32333700  |
| H | 3.87827600  | 1.25598100  | 1.58256400  |
| H | 2.80376800  | 2.02494100  | 2.81017900  |
| H | -2.95130200 | 0.56560000  | 4.67480000  |
| H | -1.49632600 | -0.43601400 | 4.46105600  |
| H | -1.42795800 | 1.34017000  | 4.15833000  |
| H | -4.17271300 | -0.96926600 | 3.33610700  |
| H | -3.87182400 | -1.24279400 | 1.59845800  |
| H | -2.78306600 | -1.97681600 | 2.83412600  |
| H | -4.15587300 | 1.57150900  | 2.96135600  |
| H | -2.78262300 | 2.34535900  | 2.11140100  |
| H | -3.90072800 | 1.24528300  | 1.22810100  |
| C | 3.15204000  | 3.90911200  | 0.13907400  |
| C | 1.05495200  | 3.05850800  | -0.97550000 |
| H | 1.88533900  | 2.33584200  | 0.85493200  |
| H | 0.52853000  | 3.93497400  | -0.54634400 |

|   |             |             |             |
|---|-------------|-------------|-------------|
| H | 1.33098300  | 3.28784300  | -2.02436500 |
| H | 0.28535300  | 2.24948900  | -1.01739300 |
| H | 2.58448000  | 4.66105400  | 0.72361200  |
| H | 4.06418900  | 3.64717300  | 0.71158800  |
| H | 3.47107800  | 4.40268200  | -0.80188700 |
| C | 4.08664100  | -3.30231200 | -0.53491300 |
| H | 2.13945600  | -2.43293100 | -0.15867400 |
| C | 2.28346000  | -2.97340900 | -2.24923500 |
| H | 3.72053700  | -4.32101200 | -0.29357400 |
| H | 4.82499900  | -3.40745500 | -1.35614200 |
| H | 4.62512700  | -2.91371000 | 0.34995500  |
| H | 1.97341100  | -4.02725300 | -2.09591900 |
| H | 1.39368500  | -2.40502100 | -2.57813500 |
| H | 3.01309700  | -2.95642900 | -3.08488000 |
| C | -3.10633600 | -3.92444000 | 0.19217100  |
| C | -1.06945600 | -3.04304500 | -1.00841600 |
| H | -1.83634900 | -2.33068800 | 0.85759000  |
| C | -4.03052100 | 3.32769500  | -0.63820400 |
| H | -2.11719700 | 2.41290400  | -0.22003400 |
| C | -2.23746200 | 2.84511900  | -2.33777600 |
| H | -1.85831300 | 3.88231000  | -2.23356100 |
| H | -1.39464200 | 2.20110000  | -2.65060900 |
| H | -2.97659200 | 2.83826200  | -3.16533500 |
| H | -3.63101800 | 4.34682900  | -0.45987600 |
| H | -4.77642200 | 3.40934500  | -1.45529400 |
| H | -4.56742100 | 3.00620200  | 0.27456000  |
| H | -0.48743400 | -3.88823500 | -0.58877200 |
| H | -1.39119300 | -3.30472100 | -2.03642900 |
| H | -0.33694200 | -2.20504000 | -1.11638400 |
| H | -2.50549500 | -4.66923500 | 0.75206100  |
| H | -3.99721900 | -3.67458800 | 0.80231900  |
| H | -3.45737200 | -4.42157300 | -0.73538100 |

**F (BP86-D3/Def2-SVP, PCM, Fluorobenzene)**

**SCF Done: E(RB-P86) = -1756.45493820 A.U.**

|    |             |            |             |
|----|-------------|------------|-------------|
| Al | -0.00390700 | 0.01412200 | -0.90890900 |
| N  | -1.44977600 | 0.05526700 | 0.26139800  |

|   |             |             |             |
|---|-------------|-------------|-------------|
| N | 1.45147100  | -0.06145500 | 0.24897000  |
| C | 1.29640100  | -0.11353100 | 1.60455100  |
| C | 2.68215000  | 0.17376300  | -0.48776400 |
| C | -1.29024400 | 0.02515300  | 1.61641100  |
| C | -2.67454300 | -0.14236500 | -0.49660100 |
| C | -2.49341200 | 0.11639900  | 2.59960400  |
| C | 0.00452200  | -0.06630200 | 2.17990400  |
| C | 2.50575600  | -0.24434900 | 2.57581100  |
| C | 2.05217700  | -0.48743500 | 4.03476600  |
| C | 3.37963400  | -1.45020400 | 2.16167200  |
| C | 3.37884300  | 1.03697200  | 2.58028900  |
| C | -2.03022300 | 0.28911000  | 4.06530600  |
| C | -3.35969000 | 1.34473600  | 2.24319800  |
| C | -3.38019600 | -1.15417400 | 2.54877100  |
| H | 0.00762000  | -0.09954900 | 3.26581200  |
| C | -0.01670200 | 0.02492300  | -2.84740100 |
| H | 1.00081900  | 0.22464500  | -3.23995100 |
| H | -0.36836000 | -0.94727400 | -3.24682900 |
| H | -0.70184700 | 0.80194500  | -3.23907500 |
| C | -3.05207600 | -1.49267800 | -0.76307300 |
| C | -4.13605800 | -1.71822900 | -1.63152000 |
| C | -4.81068200 | -0.64886600 | -2.23920400 |
| C | -3.32804100 | 0.95483900  | -1.12406000 |
| C | -4.40586500 | 0.66704200  | -1.98835200 |
| C | -2.27664200 | -2.66871300 | -0.16228000 |
| H | -4.45413800 | -2.74889700 | -1.84418800 |
| H | -5.65416800 | -0.84595700 | -2.91843800 |
| C | -2.91232300 | 2.41334700  | -0.92080300 |
| H | -4.93546500 | 1.49845100  | -2.47803800 |
| C | 3.34663400  | -0.89443000 | -1.14975000 |
| C | 4.45298900  | -0.57399500 | -1.96473400 |
| C | 4.87256500  | 0.75018900  | -2.13757200 |
| C | 3.06720800  | 1.53249600  | -0.68491700 |
| C | 4.17896800  | 1.79405000  | -1.50692700 |
| C | 2.88768100  | -2.34920100 | -1.05331400 |

|   |             |             |             |
|---|-------------|-------------|-------------|
| H | 4.99154300  | -1.38436500 | -2.47924800 |
| H | 5.73971000  | 0.97424900  | -2.77752500 |
| C | 2.25927500  | 2.67859300  | -0.07285700 |
| H | 4.50426700  | 2.83245500  | -1.66423900 |
| H | -2.92880800 | 0.40981500  | 4.70198800  |
| H | -1.47929500 | -0.59343400 | 4.44733900  |
| H | -1.40083700 | 1.19091700  | 4.20354800  |
| H | -4.12998000 | 1.48445900  | 3.02781600  |
| H | -2.75499700 | 2.27220000  | 2.18951600  |
| H | -3.88733700 | 1.20342200  | 1.28535500  |
| H | -4.17656500 | -1.05551100 | 3.31406200  |
| H | -3.87584000 | -1.28328100 | 1.56967100  |
| H | -2.79888100 | -2.06752200 | 2.78510600  |
| H | 2.95558300  | -0.62702400 | 4.66059500  |
| H | 1.49474000  | 0.37166800  | 4.45837900  |
| H | 1.43265700  | -1.40090200 | 4.13663300  |
| H | 4.17628100  | 0.91450300  | 3.34101900  |
| H | 3.87257900  | 1.21508500  | 1.60825100  |
| H | 2.78677200  | 1.93243800  | 2.85543900  |
| H | 4.15176600  | -1.62008000 | 2.93850900  |
| H | 2.77954200  | -2.37765200 | 2.06950500  |
| H | 3.90502900  | -1.26620100 | 1.20961300  |
| C | -3.14755600 | -3.91203300 | 0.07967500  |
| C | -1.05193800 | -3.03710400 | -1.01826200 |
| H | -1.88592400 | -2.34872700 | 0.82309400  |
| H | -0.52381400 | -3.91800000 | -0.60142900 |
| H | -1.32469700 | -3.24755400 | -2.07172300 |
| H | -0.28417200 | -2.22626800 | -1.04137100 |
| H | -2.57558300 | -4.66979800 | 0.65224500  |
| H | -4.06023700 | -3.66101000 | 0.65656300  |
| H | -3.46391600 | -4.38973900 | -0.87040500 |
| C | -4.09361300 | 3.30549400  | -0.48383600 |
| H | -2.14543200 | 2.43708600  | -0.11797100 |
| C | -2.28735300 | 3.00879600  | -2.19971100 |
| H | -3.72803900 | 4.32118000  | -0.22913400 |

|   |             |             |             |
|---|-------------|-------------|-------------|
| H | -4.83209700 | 3.41781800  | -1.30434500 |
| H | -4.62866700 | 2.90231000  | 0.39678300  |
| H | -1.98203600 | 4.06081700  | -2.02634100 |
| H | -1.39339100 | 2.45120500  | -2.53508900 |
| H | -3.01610500 | 3.00042100  | -3.03641700 |
| C | 3.10053800  | 3.92505300  | 0.24270000  |
| C | 1.06957900  | 3.05303700  | -0.97424000 |
| H | 1.83290900  | 2.32177900  | 0.88519300  |
| C | 4.03056600  | -3.31740200 | -0.68824600 |
| H | 2.12039000  | -2.40762000 | -0.25245000 |
| C | 2.23699600  | -2.80224400 | -2.37725300 |
| H | 1.85110000  | -3.83813100 | -2.28675300 |
| H | 1.39743500  | -2.14894300 | -2.67883400 |
| H | 2.97732800  | -2.78498300 | -3.20380500 |
| H | 3.62682500  | -4.33866800 | -0.53255200 |
| H | 4.77870900  | -3.38138400 | -1.50507500 |
| H | 4.56311700  | -3.01478000 | 0.23367800  |
| H | 0.48283300  | 3.88902000  | -0.54402700 |
| H | 1.39214400  | 3.32631200  | -1.99872500 |
| H | 0.34054900  | 2.21356100  | -1.09311400 |
| H | 2.49226400  | 4.66031300  | 0.80701600  |
| H | 3.98766000  | 3.66879000  | 0.85598400  |
| H | 3.45544200  | 4.43170400  | -0.67827000 |

**F-F (BP86-D3/Def2-SVP)**

**SCF Done: E(RB-P86) = -1856.45442606 A.U.**

|    |             |             |             |
|----|-------------|-------------|-------------|
| Al | 0.01140400  | -0.97384400 | -0.63485400 |
| N  | 1.51466500  | -0.12718800 | 0.23510900  |
| N  | -1.46060100 | -0.04987600 | 0.22927500  |
| C  | -1.26211300 | 0.31124700  | 1.52148500  |
| C  | -2.72911000 | -0.02881500 | -0.47135200 |
| C  | 1.33760100  | 0.16019300  | 1.54926400  |
| C  | 2.74158000  | 0.03324900  | -0.50323000 |
| C  | 2.53131800  | 0.29798500  | 2.55315900  |
| C  | 0.03777400  | 0.29754000  | 2.09528700  |
| C  | -2.42417900 | 0.72511200  | 2.48442000  |
| C  | -1.92748800 | 1.07077900  | 3.90929500  |

|   |             |             |             |
|---|-------------|-------------|-------------|
| C | -3.15039600 | 1.98359600  | 1.96108500  |
| C | -3.43189900 | -0.43719100 | 2.63509200  |
| C | 2.05715000  | 0.32258600  | 4.02665700  |
| C | 3.46633700  | -0.92272400 | 2.40581300  |
| C | 3.34498300  | 1.59396400  | 2.32667500  |
| H | 0.03858300  | 0.48454300  | 3.16346100  |
| C | -0.07748100 | -0.88149100 | -2.59417300 |
| H | -1.06663500 | -0.49624500 | -2.91984000 |
| H | 0.70310300  | -0.22324500 | -3.03194800 |
| H | 0.04008700  | -1.87865700 | -3.06760700 |
| C | 3.12522200  | 1.34586400  | -0.91299200 |
| C | 4.28349000  | 1.50205300  | -1.69730500 |
| C | 5.04551000  | 0.39635100  | -2.09681300 |
| C | 3.49677800  | -1.10208300 | -0.92372800 |
| C | 4.64330600  | -0.88812700 | -1.71670200 |
| C | 2.25488900  | 2.56222100  | -0.60880900 |
| H | 4.58749200  | 2.51196200  | -2.01120700 |
| H | 5.94825900  | 0.53733700  | -2.71153900 |
| C | 3.11706500  | -2.53880500 | -0.56693600 |
| H | 5.23574100  | -1.75863300 | -2.03857800 |
| C | -3.13593800 | 1.13011000  | -1.19890400 |
| C | -4.39296400 | 1.12380900  | -1.83779600 |
| C | -5.22270400 | -0.00131400 | -1.81474400 |
| C | -3.52697600 | -1.21486700 | -0.52499600 |
| C | -4.77083900 | -1.16605200 | -1.18512300 |
| C | -2.24321300 | 2.35277100  | -1.40797200 |
| H | -4.71908800 | 2.02638000  | -2.37784100 |
| H | -6.20487900 | 0.01937500  | -2.31225900 |
| C | -3.05150300 | -2.56190300 | 0.01641200  |
| H | -5.39467700 | -2.07255400 | -1.20845800 |
| H | 2.95164100  | 0.33947700  | 4.68175500  |
| H | 1.46100900  | 1.22480100  | 4.27065500  |
| H | 1.46515000  | -0.57615500 | 4.29208400  |
| H | 4.23075800  | -0.90257800 | 3.20972400  |
| H | 2.90365500  | -1.87418700 | 2.48803500  |

|   |             |             |             |
|---|-------------|-------------|-------------|
| H | 3.99910700  | -0.91178000 | 1.44008800  |
| H | 4.11562000  | 1.68070600  | 3.12100200  |
| H | 3.86665600  | 1.59183800  | 1.35316300  |
| H | 2.69790100  | 2.49222800  | 2.38388900  |
| H | -2.80337700 | 1.36948600  | 4.52007500  |
| H | -1.45453500 | 0.20680500  | 4.41783500  |
| H | -1.21503400 | 1.92002400  | 3.91553400  |
| H | -4.16807500 | -0.18643000 | 3.42690100  |
| H | -3.99295600 | -0.61841800 | 1.70256400  |
| H | -2.91922500 | -1.37539400 | 2.92798500  |
| H | -3.89720200 | 2.31645000  | 2.71164200  |
| H | -2.43342600 | 2.81438200  | 1.80312600  |
| H | -3.68699400 | 1.79287900  | 1.01611000  |
| C | 3.04653300  | 3.85397600  | -0.34676200 |
| C | 1.26275600  | 2.76427000  | -1.76542200 |
| H | 1.65584100  | 2.34002100  | 0.29667800  |
| H | 0.57411900  | 3.60807400  | -1.55426800 |
| H | 1.79941200  | 2.98372700  | -2.71239100 |
| H | 0.65652900  | 1.85448500  | -1.92963700 |
| H | 2.36140500  | 4.65778100  | -0.00621400 |
| H | 3.82667600  | 3.71742900  | 0.42850100  |
| H | 3.54534700  | 4.22547200  | -1.26641900 |
| C | 4.28797500  | -3.33973800 | 0.03666000  |
| H | 2.29913800  | -2.50306600 | 0.17930900  |
| C | 2.57144100  | -3.28025000 | -1.80450200 |
| H | 3.93074200  | -4.33434700 | 0.37528100  |
| H | 5.08974000  | -3.51861500 | -0.71064200 |
| H | 4.74775400  | -2.82926300 | 0.90529400  |
| H | 2.20200000  | -4.28688700 | -1.52102600 |
| H | 1.73244500  | -2.73270400 | -2.27104300 |
| H | 3.36287100  | -3.40290000 | -2.57448400 |
| C | -4.11861400 | -3.33521200 | 0.81272800  |
| C | -2.55770500 | -3.42733300 | -1.16473400 |
| H | -2.18245000 | -2.38617200 | 0.67945500  |
| C | -2.90859100 | 3.69305200  | -1.03611700 |



|   |             |             |             |
|---|-------------|-------------|-------------|
| H | -1.33914800 | 2.22166200  | -0.77780200 |
| C | -1.81107200 | 2.40993600  | -2.89052400 |
| H | -1.16325400 | 3.28896200  | -3.08211600 |
| H | -1.26005500 | 1.50136600  | -3.19688900 |
| H | -2.70109700 | 2.50021600  | -3.54764000 |
| H | -2.17841200 | 4.52187500  | -1.14675700 |
| H | -3.76059300 | 3.92059000  | -1.71075000 |
| H | -3.28892800 | 3.71027000  | 0.00161200  |
| H | -2.07602800 | -4.35455800 | -0.79472800 |
| H | -3.40706300 | -3.70528800 | -1.82474300 |
| H | -1.81488800 | -2.88977400 | -1.78424700 |
| H | -3.67007200 | -4.25058300 | 1.25094700  |
| H | -4.54729900 | -2.73660800 | 1.64012000  |
| H | -4.95844700 | -3.66596800 | 0.16583900  |
| F | 0.03275600  | -2.53763600 | 0.08205100  |

**F-F (BP86-D3/Def2-SVP, PCM, Fluorobenzene)**

**SCF Done: E(RB-P86) = -1856.45976043 A.U.**

|    |             |             |             |
|----|-------------|-------------|-------------|
| Al | -0.01101800 | 0.97198000  | -0.63737300 |
| N  | -1.51654900 | 0.13909100  | 0.23524500  |
| N  | 1.46237500  | 0.06015100  | 0.22905000  |
| C  | 1.26331800  | -0.28863000 | 1.52582700  |
| C  | 2.72972900  | 0.02313300  | -0.47417200 |
| C  | -1.33823800 | -0.13708100 | 1.55317400  |
| C  | -2.74237800 | -0.03412200 | -0.50310700 |
| C  | -2.53004900 | -0.27509900 | 2.55826400  |
| C  | -0.03711900 | -0.26368200 | 2.09924700  |
| C  | 2.42231400  | -0.70165300 | 2.49178600  |
| C  | 1.92402700  | -1.02677900 | 3.92096800  |
| C  | 3.13506600  | -1.97294000 | 1.98055300  |
| C  | 3.44189800  | 0.45207100  | 2.62890500  |
| C  | -2.05515700 | -0.28208600 | 4.03178400  |
| C  | -3.47848400 | 0.93397400  | 2.40061600  |
| C  | -3.32955300 | -1.58186500 | 2.34279300  |
| H  | -0.03750500 | -0.43981400 | 3.16953800  |
| C  | 0.07334900  | 0.88183700  | -2.59757900 |
| H  | 1.05262200  | 0.47196200  | -2.92309700 |

|   |             |             |             |
|---|-------------|-------------|-------------|
| H | -0.72256700 | 0.23850700  | -3.03011300 |
| H | -0.02339800 | 1.88137800  | -3.07110500 |
| C | -3.12104000 | -1.35143800 | -0.90292400 |
| C | -4.27789800 | -1.51793600 | -1.68831800 |
| C | -5.04353300 | -0.41824800 | -2.09887000 |
| C | -3.50283900 | 1.09442700  | -0.93311200 |
| C | -4.64709700 | 0.87127000  | -1.72743800 |
| C | -2.24786400 | -2.56354200 | -0.59143400 |
| H | -4.57732000 | -2.53148600 | -1.99493400 |
| H | -5.94444600 | -0.56761800 | -2.71439800 |
| C | -3.13204800 | 2.53507900  | -0.58333300 |
| H | -5.24300700 | 1.73670000  | -2.05682500 |
| C | 3.12669200  | -1.14498800 | -1.19284900 |
| C | 4.38361800  | -1.15403800 | -1.83310600 |
| C | 5.22266600  | -0.03517100 | -1.82111400 |
| C | 3.53805400  | 1.20180100  | -0.53850000 |
| C | 4.78056800  | 1.13886700  | -1.20061500 |
| C | 2.22546500  | -2.36270400 | -1.39318000 |
| H | 4.70245200  | -2.06370800 | -2.36553500 |
| H | 6.20413300  | -0.06805200 | -2.31943100 |
| C | 3.07696700  | 2.55687800  | -0.00467600 |
| H | 5.41213600  | 2.03980800  | -1.23243300 |
| H | -2.94992300 | -0.29967400 | 4.68616900  |
| H | -1.45264400 | -1.17766900 | 4.28373400  |
| H | -1.47006400 | 0.62353200  | 4.28903000  |
| H | -4.24442000 | 0.90843700  | 3.20259000  |
| H | -2.92777800 | 1.89266900  | 2.48110800  |
| H | -4.00884000 | 0.91216300  | 1.43371500  |
| H | -4.09649400 | -1.67079900 | 3.14010500  |
| H | -3.85418000 | -1.59230600 | 1.37096000  |
| H | -2.67226100 | -2.47222500 | 2.40417500  |
| H | 2.79871100  | -1.32524000 | 4.53322400  |
| H | 1.45889800  | -0.15298800 | 4.41975800  |
| H | 1.20530100  | -1.87044600 | 3.93773900  |
| H | 4.17581900  | 0.20051600  | 3.42217800  |

|   |             |             |             |
|---|-------------|-------------|-------------|
| H | 4.00408200  | 0.61826000  | 1.69427100  |
| H | 2.93972600  | 1.39820000  | 2.91451900  |
| H | 3.87979200  | -2.30340600 | 2.73387100  |
| H | 2.41010300  | -2.79867600 | 1.83361400  |
| H | 3.67175800  | -1.79804200 | 1.03257500  |
| C | -3.03590600 | -3.85356300 | -0.30988200 |
| C | -1.26733300 | -2.77739100 | -1.75597000 |
| H | -1.64116800 | -2.33108500 | 0.30621300  |
| H | -0.57517500 | -3.61685400 | -1.54077600 |
| H | -1.81387200 | -3.01105800 | -2.69390200 |
| H | -0.66463200 | -1.86843600 | -1.93812900 |
| H | -2.34558100 | -4.65165300 | 0.03308000  |
| H | -3.80893900 | -3.71017400 | 0.47113100  |
| H | -3.54173000 | -4.23429600 | -1.22177100 |
| C | -4.30915500 | 3.33347500  | 0.01162100  |
| H | -2.31835000 | 2.50467800  | 0.16746100  |
| C | -2.58533400 | 3.27154900  | -1.82336800 |
| H | -3.95863200 | 4.33214400  | 0.34547500  |
| H | -5.10907000 | 3.50220700  | -0.73977700 |
| H | -4.76717200 | 2.82476400  | 0.88215600  |
| H | -2.22936200 | 4.28559800  | -1.54760800 |
| H | -1.73861600 | 2.72751700  | -2.28069500 |
| H | -3.37373900 | 3.38061400  | -2.59836200 |
| C | 4.15390200  | 3.32591200  | 0.78281000  |
| C | 2.58899700  | 3.41848800  | -1.19096000 |
| H | 2.20985100  | 2.39084700  | 0.66323600  |
| C | 2.87772000  | -3.70443800 | -1.00340300 |
| H | 1.31863800  | -2.21804300 | -0.77018600 |
| C | 1.80360500  | -2.43245400 | -2.87839700 |
| H | 1.14992600  | -3.30814600 | -3.06413500 |
| H | 1.26173000  | -1.52283900 | -3.19882200 |
| H | 2.69757800  | -2.53838400 | -3.52772800 |
| H | 2.14171500  | -4.52781800 | -1.11456800 |
| H | 3.73494800  | -3.94294800 | -1.66746000 |
| H | 3.24562100  | -3.71500600 | 0.03877000  |

|   |             |            |             |
|---|-------------|------------|-------------|
| H | 2.13457100  | 4.36301500 | -0.82883500 |
| H | 3.43810900  | 3.67122400 | -1.86120000 |
| H | 1.82953100  | 2.88887400 | -1.79751800 |
| H | 3.71518100  | 4.24785000 | 1.21736000  |
| H | 4.57884900  | 2.72767900 | 1.61220100  |
| H | 4.99382500  | 3.64403800 | 0.13003400  |
| F | -0.02820300 | 2.54797800 | 0.06587600  |

**F-H (BP86-D3/Def2-SVP)**

**SCF Done: E(RB-P86) = -1757.19307400 A.U.**

|    |             |             |             |
|----|-------------|-------------|-------------|
| Al | -0.01149200 | 1.08258000  | -0.65638500 |
| N  | -1.51786600 | 0.20805700  | 0.23034000  |
| N  | 1.45987600  | 0.12490500  | 0.22510300  |
| C  | 1.26080200  | -0.15835800 | 1.53334400  |
| C  | 2.72460900  | 0.07247100  | -0.47375200 |
| C  | -1.34064000 | -0.00435900 | 1.55630400  |
| C  | -2.73585600 | 0.00643800  | -0.50604600 |
| C  | -2.53377700 | -0.12718900 | 2.56395600  |
| C  | -0.03783600 | -0.08157300 | 2.11141400  |
| C  | 2.41562000  | -0.55856000 | 2.51185100  |
| C  | 1.91501600  | -0.83858200 | 3.94949800  |
| C  | 3.10931700  | -1.85226400 | 2.03288700  |
| C  | 3.45291100  | 0.58261100  | 2.61677400  |
| C  | -2.06518300 | -0.07715100 | 4.03833300  |
| C  | -3.50302100 | 1.05861100  | 2.36377400  |
| C  | -3.31083200 | -1.45273100 | 2.38779600  |
| H  | -0.03600900 | -0.19885500 | 3.18961000  |
| C  | 0.07155500  | 0.81984100  | -2.61688200 |
| H  | 1.06802400  | 0.42664700  | -2.91076700 |
| H  | -0.69539700 | 0.10667400  | -2.98891600 |
| H  | -0.06849200 | 1.76343500  | -3.18568000 |
| C  | -3.11279200 | -1.32040400 | -0.87325600 |
| C  | -4.26416900 | -1.50623500 | -1.66178600 |
| C  | -5.02617400 | -0.41784400 | -2.10617100 |
| C  | -3.49272100 | 1.12303300  | -0.97205900 |
| C  | -4.63163900 | 0.88081700  | -1.76675800 |
| C  | -2.24254700 | -2.52317400 | -0.51979100 |

|   |             |             |             |
|---|-------------|-------------|-------------|
| H | -4.56259900 | -2.52737300 | -1.94349800 |
| H | -5.92274500 | -0.58316600 | -2.72383400 |
| C | -3.11652300 | 2.57051400  | -0.65459900 |
| H | -5.22422600 | 1.73780300  | -2.12307300 |
| C | 3.13517400  | -1.10856900 | -1.16243500 |
| C | 4.39149000  | -1.11832600 | -1.80300500 |
| C | 5.21704500  | 0.00997000  | -1.82062800 |
| C | 3.51953700  | 1.25828300  | -0.56958200 |
| C | 4.76204300  | 1.19410000  | -1.22987400 |
| C | 2.24716500  | -2.34118300 | -1.32655700 |
| H | 4.72070500  | -2.03765600 | -2.31212900 |
| H | 6.19813900  | -0.02405700 | -2.31949400 |
| C | 3.03615800  | 2.61831200  | -0.06724500 |
| H | 5.38246200  | 2.10162600  | -1.28517600 |
| H | -2.96129900 | -0.09062700 | 4.69143300  |
| H | -1.44528100 | -0.95151600 | 4.32086600  |
| H | -1.49854000 | 0.84755400  | 4.26765000  |
| H | -4.27657100 | 1.04318300  | 3.15911900  |
| H | -2.96994900 | 2.02888900  | 2.42156700  |
| H | -4.02319800 | 0.99959300  | 1.39273100  |
| H | -4.07907300 | -1.53176200 | 3.18534000  |
| H | -3.83210200 | -1.50004300 | 1.41520100  |
| H | -2.63914900 | -2.33011400 | 2.47659200  |
| H | 2.78463300  | -1.13740000 | 4.56930900  |
| H | 1.46626700  | 0.05536200  | 4.42741300  |
| H | 1.18001400  | -1.66744000 | 3.98729300  |
| H | 4.19114800  | 0.33789600  | 3.40867900  |
| H | 4.00847400  | 0.72277100  | 1.67365100  |
| H | 2.96599600  | 1.54101400  | 2.88776800  |
| H | 3.84628100  | -2.18007500 | 2.79538800  |
| H | 2.37165700  | -2.66906700 | 1.89894100  |
| H | 3.65219300  | -1.70519800 | 1.08373000  |
| C | -3.03528300 | -3.80090300 | -0.19801600 |
| C | -1.25509500 | -2.77811500 | -1.67002500 |
| H | -1.63973200 | -2.26011700 | 0.37216000  |

|   |             |             |             |
|---|-------------|-------------|-------------|
| H | -0.56765800 | -3.61353500 | -1.42396300 |
| H | -1.79570600 | -3.03884200 | -2.60428400 |
| H | -0.64837900 | -1.87737700 | -1.87524500 |
| H | -2.34995300 | -4.59089700 | 0.17320100  |
| H | -3.81144800 | -3.63010400 | 0.57445900  |
| H | -3.53934500 | -4.21038800 | -1.09852400 |
| C | -4.29679400 | 3.39084200  | -0.09681200 |
| H | -2.31551400 | 2.54974200  | 0.11348800  |
| C | -2.54232300 | 3.27569800  | -1.89987300 |
| H | -3.94472900 | 4.39264700  | 0.22578800  |
| H | -5.07961200 | 3.55347900  | -0.86737300 |
| H | -4.77867900 | 2.90188200  | 0.77213400  |
| H | -2.20674100 | 4.30228300  | -1.64501200 |
| H | -1.67512300 | 2.73095100  | -2.31688600 |
| H | -3.30873000 | 3.35013000  | -2.70041400 |
| C | 4.10494700  | 3.42812100  | 0.68986600  |
| C | 2.51388100  | 3.44127800  | -1.26540600 |
| H | 2.17999200  | 2.44970500  | 0.61777100  |
| C | 2.91521800  | -3.66353800 | -0.89893300 |
| H | 1.34043800  | -2.18562100 | -0.70571500 |
| C | 1.82115600  | -2.46032100 | -2.80717900 |
| H | 1.17499200  | -3.34744300 | -2.96408900 |
| H | 1.27042900  | -1.56579500 | -3.15281400 |
| H | 2.71374600  | -2.57748400 | -3.45664000 |
| H | 2.18907400  | -4.49901600 | -0.98312800 |
| H | 3.77287300  | -3.91276000 | -1.55867500 |
| H | 3.28830300  | -3.64040700 | 0.14129800  |
| H | 2.05785000  | 4.39161500  | -0.91901100 |
| H | 3.34376100  | 3.68125800  | -1.96368700 |
| H | 1.74283700  | 2.89230200  | -1.84043800 |
| H | 3.65201600  | 4.34862500  | 1.11265700  |
| H | 4.55640000  | 2.85598300  | 1.52371600  |
| H | 4.92804300  | 3.75291200  | 0.01913000  |
| H | -0.01808800 | 2.56452400  | -0.01949600 |

**F-H (BP86-D3/Def2-SVP, PCM, Fluorobenzene)**

**SCF Done: E(RB-P86) = -1757.19755889 A.U.**

|    |             |             |             |
|----|-------------|-------------|-------------|
| Al | -0.01157900 | 1.07469100  | -0.66328500 |
| N  | -1.51929500 | 0.21696300  | 0.22814600  |
| N  | 1.46132800  | 0.13357200  | 0.22291200  |
| C  | 1.26206700  | -0.13258900 | 1.53595100  |
| C  | 2.72568700  | 0.06706600  | -0.47682800 |
| C  | -1.34112000 | 0.02161300  | 1.55799900  |
| C  | -2.73641400 | 0.00166600  | -0.50694300 |
| C  | -2.53216800 | -0.09592500 | 2.56769300  |
| C  | -0.03703300 | -0.04345200 | 2.11243400  |
| C  | 2.41404300  | -0.52717400 | 2.51904200  |
| C  | 1.91180200  | -0.78390600 | 3.96050700  |
| C  | 3.09673800  | -1.83272000 | 2.05609500  |
| C  | 3.46062500  | 0.60691200  | 2.60883500  |
| C  | -2.06266800 | -0.02404800 | 4.04094600  |
| C  | -3.51204500 | 1.07868800  | 2.35372400  |
| C  | -3.29743300 | -1.43052300 | 2.40808400  |
| H  | -0.03468500 | -0.14643300 | 3.19235200  |
| C  | 0.06869800  | 0.80675100  | -2.62388100 |
| H  | 1.06109000  | 0.40004700  | -2.91333300 |
| H  | -0.70483800 | 0.09616100  | -2.98746300 |
| H  | -0.06348300 | 1.74897500  | -3.19698800 |
| C  | -3.10841200 | -1.33055000 | -0.86027000 |
| C  | -4.25732300 | -1.52883500 | -1.65043200 |
| C  | -5.02186200 | -0.44779700 | -2.10970600 |
| C  | -3.49753100 | 1.11031800  | -0.98584600 |
| C  | -4.63334600 | 0.85642300  | -1.78211700 |
| C  | -2.23683700 | -2.52795000 | -0.49286800 |
| H  | -4.55139900 | -2.55405700 | -1.92184900 |
| H  | -5.91584500 | -0.62299700 | -2.72852400 |
| C  | -3.13086900 | 2.56248200  | -0.67905200 |
| H  | -5.22880800 | 1.70721100  | -2.14852100 |
| C  | 3.13077200  | -1.12359500 | -1.15240100 |
| C  | 4.38684500  | -1.14600300 | -1.79437400 |
| C  | 5.21729200  | -0.02102700 | -1.82652800 |
| C  | 3.52662000  | 1.24789200  | -0.58621700 |

|   |             |             |             |
|---|-------------|-------------|-------------|
| C | 4.76800600  | 1.17207800  | -1.24812900 |
| C | 2.23886900  | -2.35504300 | -1.30288700 |
| H | 4.71222400  | -2.07253200 | -2.29282400 |
| H | 6.19764000  | -0.06490900 | -2.32619600 |
| C | 3.05188900  | 2.61497500  | -0.09529100 |
| H | 5.39266700  | 2.07598500  | -1.31447100 |
| H | -2.95886600 | -0.03460000 | 4.69366500  |
| H | -1.43802900 | -0.89141600 | 4.33390900  |
| H | -1.50155200 | 0.90684600  | 4.25845700  |
| H | -4.28570800 | 1.06300700  | 3.14861900  |
| H | -2.98879000 | 2.05479600  | 2.40348200  |
| H | -4.03120500 | 1.00538700  | 1.38309000  |
| H | -4.06297900 | -1.50604100 | 3.20822300  |
| H | -3.82047700 | -1.49365600 | 1.43738100  |
| H | -2.61792000 | -2.30079600 | 2.50560900  |
| H | 2.78041000  | -1.07879800 | 4.58325500  |
| H | 1.46878600  | 0.11958900  | 4.42555100  |
| H | 1.17246300  | -1.60816200 | 4.01035000  |
| H | 4.19725000  | 0.36385800  | 3.40239400  |
| H | 4.01650500  | 0.73202700  | 1.66381300  |
| H | 2.98256400  | 1.57223100  | 2.87083600  |
| H | 3.83080000  | -2.15557100 | 2.82314800  |
| H | 2.35279800  | -2.64541700 | 1.93279700  |
| H | 3.64091000  | -1.70218500 | 1.10527100  |
| C | -3.02775000 | -3.80176400 | -0.15114300 |
| C | -1.25511000 | -2.79871000 | -1.64451100 |
| H | -1.63051900 | -2.25258600 | 0.39280200  |
| H | -0.56541900 | -3.62897500 | -1.38871900 |
| H | -1.80066100 | -3.07563400 | -2.57128200 |
| H | -0.65040900 | -1.90043000 | -1.86667100 |
| H | -2.33916900 | -4.58527200 | 0.22730200  |
| H | -3.79962500 | -3.62105300 | 0.62331000  |
| H | -3.53572900 | -4.22250200 | -1.04413100 |
| C | -4.31825700 | 3.38092200  | -0.13358300 |
| H | -2.33475900 | 2.55091600  | 0.09409100  |



|   |             |             |             |
|---|-------------|-------------|-------------|
| C | -2.55556500 | 3.26014600  | -1.92819800 |
| H | -3.97286500 | 4.38728900  | 0.18188100  |
| H | -5.09843000 | 3.53143800  | -0.90912200 |
| H | -4.79932200 | 2.89606200  | 0.73810100  |
| H | -2.23272100 | 4.29340800  | -1.68315800 |
| H | -1.68093200 | 2.71899900  | -2.33506300 |
| H | -3.31869100 | 3.31934600  | -2.73307300 |
| C | 4.12711200  | 3.42734600  | 0.64998200  |
| C | 2.53012100  | 3.42844600  | -1.30021400 |
| H | 2.19870000  | 2.45516100  | 0.59530100  |
| C | 2.90108200  | -3.67449900 | -0.85749100 |
| H | 1.33095700  | -2.18921200 | -0.68669000 |
| C | 1.81770400  | -2.49078800 | -2.78368900 |
| H | 1.16798800  | -3.37677700 | -2.93104900 |
| H | 1.27172300  | -1.59809200 | -3.14231300 |
| H | 2.71215200  | -2.62098600 | -3.42807900 |
| H | 2.17224100  | -4.50791400 | -0.93696800 |
| H | 3.76202200  | -3.93226400 | -1.50954900 |
| H | 3.26648700  | -3.64049100 | 0.18511100  |
| H | 2.08670900  | 4.38844300  | -0.96347500 |
| H | 3.35894700  | 3.65334000  | -2.00464100 |
| H | 1.75159100  | 2.87912100  | -1.86533400 |
| H | 3.67940600  | 4.35365200  | 1.06556200  |
| H | 4.57736100  | 2.86040800  | 1.48791900  |
| H | 4.94904700  | 3.74086800  | -0.02727100 |
| H | -0.01668600 | 2.56950500  | -0.04369600 |

**D (BP86-D3/Def2-SVP)**

**SCF Done: E(RB-P86) = -1676.18090473 A.U.**

|   |             |             |             |
|---|-------------|-------------|-------------|
| N | -0.28474000 | 1.87929600  | -0.43169200 |
| N | -2.36720800 | 1.25057400  | -0.20766900 |
| F | 0.79987100  | 0.21412200  | 2.02549800  |
| C | -1.08534700 | 0.77823900  | -0.25245900 |
| F | 0.73291300  | -2.82479200 | -1.63979700 |
| C | -2.37702800 | 2.62375200  | -0.34258200 |
| H | -3.30554700 | 3.20230300  | -0.30074400 |

|   |             |             |             |
|---|-------------|-------------|-------------|
| C | -1.06157500 | 3.01910000  | -0.50289000 |
| H | -0.62148000 | 4.00689700  | -0.67116300 |
| C | 1.15285600  | 1.81721500  | -0.56961100 |
| C | -3.52121500 | 0.40805500  | 0.01532100  |
| C | 1.68519300  | 1.12604200  | -1.68355300 |
| C | -4.31711100 | 0.05516500  | -1.09812100 |
| C | -3.77590700 | -0.04337600 | 1.32988200  |
| C | 1.95846900  | 2.35913800  | 0.45903100  |
| C | 3.07405900  | 0.91042200  | -1.70318900 |
| H | 3.51253900  | 0.36479100  | -2.55410000 |
| C | 3.91483300  | 1.36663700  | -0.66711200 |
| F | 3.40235300  | -0.42408500 | 2.49865300  |
| C | 3.34202100  | 2.11578800  | 0.38027400  |
| H | 3.98997000  | 2.50245900  | 1.18257900  |
| C | -4.89512700 | -0.87643100 | 1.51154700  |
| H | -5.12293000 | -1.23998400 | 2.52624000  |
| C | 0.68659800  | -1.24781700 | 0.14813500  |
| C | -5.41857900 | -0.78314200 | -0.85437100 |
| H | -6.05107400 | -1.08366300 | -1.70504300 |
| C | -5.72826100 | -1.25560900 | 0.43904600  |
| C | 1.40791200  | -0.67809100 | 1.22288700  |
| F | 4.64517900  | -2.28753900 | 0.93749900  |
| F | 3.30861100  | -3.51130800 | -1.10776600 |
| C | 1.35116400  | -2.25134100 | -0.59967400 |
| C | 2.73713700  | -1.00742700 | 1.50259000  |
| C | 3.37544900  | -1.97779300 | 0.70144300  |
| C | 2.68743600  | -2.60571600 | -0.35674400 |
| H | -1.50680200 | -1.46561600 | -0.82025400 |
| B | -0.69280300 | -0.73367800 | -0.30706700 |
| C | 0.81147400  | 0.60917500  | -2.80213100 |
| H | 0.43943000  | -0.42116500 | -2.60301800 |
| H | -0.07279200 | 1.25277900  | -2.98028100 |
| H | 1.38571600  | 0.55013800  | -3.74677300 |
| C | 1.38454600  | 3.14831200  | 1.61032700  |
| H | 0.37615500  | 2.79857400  | 1.90315800  |

|   |             |             |             |
|---|-------------|-------------|-------------|
| H | 2.03987100  | 3.07193600  | 2.49854500  |
| H | 1.30521900  | 4.22727900  | 1.35529400  |
| C | 5.38262800  | 1.02337400  | -0.65452900 |
| H | 5.77752300  | 0.85706000  | -1.67570500 |
| H | 5.98664600  | 1.81280900  | -0.16589800 |
| H | 5.54654800  | 0.08542600  | -0.08008800 |
| C | -3.97531000 | 0.53248700  | -2.48865900 |
| H | -4.09885000 | 1.63132000  | -2.59407800 |
| H | -2.92234800 | 0.29677200  | -2.75293600 |
| H | -4.62760300 | 0.05286200  | -3.24216000 |
| C | -2.89579500 | 0.36013400  | 2.48982900  |
| H | -1.87506100 | -0.07154200 | 2.41637400  |
| H | -2.77213500 | 1.46228600  | 2.54786300  |
| H | -3.32906100 | 0.01907000  | 3.44854900  |
| C | -6.93764000 | -2.12691400 | 0.66810500  |
| H | -7.85491400 | -1.50422800 | 0.75190900  |
| H | -7.09877100 | -2.82926400 | -0.17390500 |
| H | -6.85023400 | -2.71385500 | 1.60296500  |

**D (BP86-D3/Def2-SVP, PCM, Fluorobenzene)**

**SCF Done: E(RB-P86) = -1676.22794797 A.U.**

|   |             |             |             |
|---|-------------|-------------|-------------|
| N | -0.29278600 | -1.87203100 | 0.45563000  |
| N | -2.37422900 | -1.24607100 | 0.22576000  |
| F | 0.82725800  | -0.23326300 | -2.05000800 |
| C | -1.09033500 | -0.77288100 | 0.24866500  |
| F | 0.73685600  | 2.81766900  | 1.60442400  |
| C | -2.38599000 | -2.61217800 | 0.40116000  |
| H | -3.31413000 | -3.19181200 | 0.38611900  |
| C | -1.06943900 | -3.00606800 | 0.56500900  |
| H | -0.63408800 | -3.99029600 | 0.76280500  |
| C | 1.14405000  | -1.80660900 | 0.59025300  |
| C | -3.52879500 | -0.40846800 | -0.00771000 |
| C | 1.67616400  | -1.10482400 | 1.69734200  |
| C | -4.29125500 | 0.00250300  | 1.10927400  |
| C | -3.81535700 | -0.01762000 | -1.33395200 |
| C | 1.94741500  | -2.36070900 | -0.43254400 |
| C | 3.06533300  | -0.89022100 | 1.71483100  |

|   |             |             |             |
|---|-------------|-------------|-------------|
| H | 3.50289000  | -0.33179100 | 2.55761300  |
| C | 3.90437700  | -1.35904300 | 0.68295800  |
| F | 3.42540100  | 0.41315700  | -2.52060500 |
| C | 3.33193300  | -2.11842200 | -0.35711500 |
| H | 3.97887300  | -2.51348400 | -1.15604900 |
| C | -4.93123500 | 0.81986300  | -1.52467700 |
| H | -5.18252000 | 1.13852000  | -2.54888100 |
| C | 0.70234700  | 1.23221000  | -0.17680900 |
| C | -5.39028000 | 0.84180800  | 0.85726100  |
| H | -5.99687800 | 1.18684400  | 1.70994100  |
| C | -5.72792500 | 1.25917200  | -0.44838700 |
| C | 1.42769000  | 0.66119100  | -1.24600400 |
| F | 4.66396100  | 2.28212300  | -0.95679300 |
| F | 3.31553200  | 3.50410600  | 1.08447900  |
| C | 1.36262400  | 2.23570300  | 0.57005800  |
| C | 2.75743700  | 0.99511200  | -1.52254800 |
| C | 3.39167000  | 1.96590900  | -0.72242900 |
| C | 2.69845100  | 2.59170100  | 0.33138400  |
| H | -1.52855600 | 1.49306400  | 0.69352300  |
| B | -0.69689800 | 0.73437500  | 0.25289000  |
| C | 0.80034000  | -0.57728800 | 2.80833700  |
| H | 0.38858700  | 0.43054500  | 2.57648400  |
| H | -0.05969500 | -1.24298600 | 3.01978700  |
| H | 1.38620800  | -0.46152800 | 3.74008200  |
| C | 1.36672700  | -3.16154800 | -1.57162200 |
| H | 0.37415700  | -2.78711400 | -1.88774500 |
| H | 2.03941100  | -3.13131300 | -2.44936400 |
| H | 1.24429800  | -4.22802500 | -1.28495700 |
| C | 5.37275300  | -1.01556400 | 0.66886300  |
| H | 5.77255500  | -0.87599400 | 1.69236000  |
| H | 5.97199500  | -1.79169500 | 0.15375300  |
| H | 5.53228000  | -0.06144800 | 0.12081600  |
| C | -3.92114000 | -0.42564700 | 2.50793000  |
| H | -4.09449600 | -1.51173200 | 2.66321500  |
| H | -2.84828400 | -0.23636900 | 2.72250900  |

|   |             |             |             |
|---|-------------|-------------|-------------|
| H | -4.52246400 | 0.11965000  | 3.25917900  |
| C | -2.97007500 | -0.48342700 | -2.49555300 |
| H | -1.94618400 | -0.05428500 | -2.46653300 |
| H | -2.85371400 | -1.58758900 | -2.50086500 |
| H | -3.42690900 | -0.18373800 | -3.45713200 |
| C | -6.92678000 | 2.14619700  | -0.67961900 |
| H | -7.87005300 | 1.58001600  | -0.52275700 |
| H | -6.94092500 | 2.99686400  | 0.03212500  |
| H | -6.94405500 | 2.55131500  | -1.70981200 |

**D-F (BP86-D3/Def2-SVP)**

**SCF Done: E(RB-P86) = -1776.22168812 A.U.**

|   |             |             |             |
|---|-------------|-------------|-------------|
| N | -0.17375300 | -1.09965500 | 1.34169500  |
| N | -2.26321200 | -0.63538300 | 1.00714000  |
| F | 1.78779500  | -0.96463700 | -2.44087300 |
| C | -1.03007400 | -0.54709800 | 0.42988500  |
| F | -0.00837900 | 2.47940100  | 0.34325600  |
| C | -2.18582500 | -1.23181600 | 2.26291000  |
| H | -3.07650600 | -1.39370100 | 2.87710700  |
| C | -0.86167000 | -1.52382100 | 2.47552400  |
| H | -0.34589500 | -1.99864100 | 3.31525000  |
| C | 1.24966400  | -1.25180200 | 1.15553500  |
| C | -3.49746400 | -0.19999000 | 0.39863900  |
| C | 2.11383400  | -0.32811900 | 1.78712200  |
| C | -3.98681300 | 1.08596300  | 0.71361500  |
| C | -4.16458000 | -1.08471300 | -0.47426500 |
| C | 1.71347500  | -2.29762600 | 0.33037000  |
| C | 3.48829500  | -0.45245400 | 1.52816900  |
| H | 4.17929200  | 0.27890200  | 1.97829500  |
| C | 4.00091000  | -1.45852700 | 0.68278400  |
| F | 4.22205100  | 0.14072800  | -2.22057000 |
| C | 3.10264000  | -2.37882700 | 0.11241600  |
| H | 3.48680000  | -3.16980000 | -0.55108700 |
| C | -5.38095200 | -0.64520900 | -1.03057000 |
| H | -5.92152500 | -1.31828400 | -1.71595000 |
| C | 0.76013500  | 0.72502600  | -1.08610400 |

|   |             |             |             |
|---|-------------|-------------|-------------|
| C | -5.20599400 | 1.47391600  | 0.13053500  |
| H | -5.60681800 | 2.47506600  | 0.35936200  |
| C | -5.91669600 | 0.62504100  | -0.74269200 |
| C | 1.88258500  | 0.17386600  | -1.72641700 |
| F | 4.60519400  | 2.39195900  | -0.70421500 |
| F | 2.45705900  | 3.56377800  | 0.56932700  |
| C | 1.00741000  | 1.89396000  | -0.35070100 |
| C | 3.16954700  | 0.73246500  | -1.62664400 |
| C | 3.37021900  | 1.88576500  | -0.85356300 |
| C | 2.27419600  | 2.48101800  | -0.20744200 |
| H | -1.58898000 | 0.94092400  | -1.24919500 |
| B | -0.73532400 | 0.06387900  | -1.06882300 |
| C | 1.58176100  | 0.76263200  | 2.68420400  |
| H | 0.69078800  | 1.25729800  | 2.25068800  |
| H | 1.28360600  | 0.36445700  | 3.67849200  |
| H | 2.34998700  | 1.54153100  | 2.85156100  |
| C | 0.75276300  | -3.24464800 | -0.34147300 |
| H | 0.20157000  | -2.72353700 | -1.15315500 |
| H | 1.29155100  | -4.10409800 | -0.78385200 |
| H | -0.00364300 | -3.63600000 | 0.37075900  |
| C | 5.47451100  | -1.49553400 | 0.35958400  |
| H | 6.09691800  | -1.36973300 | 1.26931500  |
| H | 5.76349600  | -2.44359500 | -0.13464000 |
| H | 5.72800000  | -0.66544000 | -0.33315200 |
| C | -3.19646900 | 2.01606100  | 1.59897300  |
| H | -2.95817500 | 1.55640000  | 2.58129800  |
| H | -2.22835800 | 2.27355200  | 1.12063000  |
| H | -3.75123900 | 2.95532100  | 1.78574600  |
| C | -3.56689000 | -2.42343800 | -0.82571200 |
| H | -2.64237600 | -2.27395200 | -1.42408700 |
| H | -3.28246100 | -3.00018500 | 0.07959300  |
| H | -4.27634100 | -3.03412200 | -1.41610400 |
| C | -7.20466200 | 1.08675700  | -1.38329900 |
| H | -7.80955200 | 1.70252100  | -0.68697800 |
| H | -6.99637800 | 1.71539800  | -2.27666100 |

H -7.82452000 0.23188700 -1.71937400  
F -0.89560700 -1.01227200 -2.01135700

**D-F (BP86-D3/Def2-SVP, PCM, Fluorobenzene)**

**SCF Done: E(RB-P86) = -1776.23159253 A.U.**

N -0.17461100 -1.11444700 1.32215100  
N -2.26520700 -0.65094900 0.99507100  
F 1.78527700 -0.93973600 -2.44079200  
C -1.03280900 -0.55334400 0.41768000  
F 0.00073100 2.50751900 0.34893500  
C -2.18539200 -1.26203000 2.24357200  
H -3.07347800 -1.43387800 2.85892300  
C -0.86072100 -1.55394200 2.45145400  
H -0.34542100 -2.03821700 3.28608400  
C 1.24844800 -1.26296000 1.13487700  
C -3.49978700 -0.20820800 0.39383900  
C 2.11319600 -0.34730100 1.77751100  
C -3.99077700 1.07333500 0.72806000  
C -4.16934700 -1.08233700 -0.48740400  
C 1.71319900 -2.30497500 0.30541900  
C 3.48903400 -0.47430000 1.52378500  
H 4.18064700 0.24922000 1.98546900  
C 4.00245600 -1.47766600 0.67503300  
F 4.22494200 0.14951900 -2.20812100  
C 3.10334300 -2.39074200 0.09288100  
H 3.48851300 -3.18201600 -0.56991100  
C -5.38553500 -0.63448200 -1.04057000  
H -5.92822500 -1.29951700 -1.73195400  
C 0.76429500 0.74605000 -1.07405200  
C -5.20844400 1.47074200 0.14798500  
H -5.60981800 2.46830300 0.39096100  
C -5.92000300 0.63305200 -0.73751600  
C 1.88558800 0.19346100 -1.71424100  
F 4.61577000 2.39845500 -0.68727400  
F 2.47089200 3.57907000 0.58133300  
C 1.01532800 1.91325400 -0.33653000  
C 3.17535700 0.74289100 -1.60986900

|   |             |             |             |
|---|-------------|-------------|-------------|
| C | 3.37949800  | 1.89416000  | -0.83538400 |
| C | 2.28510100  | 2.49299700  | -0.19097500 |
| H | -1.58165600 | 0.98238300  | -1.22401500 |
| B | -0.73516500 | 0.09135400  | -1.06254700 |
| C | 1.58174200  | 0.73292900  | 2.68696800  |
| H | 0.68025000  | 1.22122200  | 2.26839200  |
| H | 1.29661900  | 0.32236100  | 3.67965900  |
| H | 2.34632400  | 1.51525000  | 2.85488200  |
| C | 0.75099800  | -3.24966400 | -0.36856300 |
| H | 0.18234500  | -2.72179000 | -1.16287000 |
| H | 1.29047900  | -4.09721400 | -0.83243900 |
| H | 0.00845500  | -3.65806100 | 0.34838900  |
| C | 5.47956900  | -1.52566500 | 0.36842300  |
| H | 6.09112300  | -1.44378100 | 1.29046100  |
| H | 5.75998100  | -2.45903300 | -0.15747700 |
| H | 5.75789500  | -0.67316000 | -0.28649700 |
| C | -3.20902900 | 1.98312500  | 1.64203700  |
| H | -3.02570200 | 1.51650600  | 2.63279400  |
| H | -2.21449700 | 2.21218900  | 1.20590500  |
| H | -3.74452100 | 2.93747900  | 1.80613000  |
| C | -3.58174000 | -2.42534000 | -0.84162600 |
| H | -2.64671300 | -2.28704200 | -1.42496200 |
| H | -3.31740400 | -3.01032400 | 0.06421000  |
| H | -4.29016600 | -3.02283400 | -1.44636100 |
| C | -7.21401800 | 1.10254000  | -1.35984800 |
| H | -7.89193900 | 1.54395100  | -0.60030800 |
| H | -7.02371400 | 1.89238500  | -2.11836300 |
| H | -7.74930200 | 0.27479800  | -1.86491600 |
| F | -0.90459200 | -0.94612300 | -2.05160000 |

**D-H (BP86-D3/Def2-SVP)**

**SCF Done: E(RB-P86) = -1677.00262771 A.U.**

|   |             |             |             |
|---|-------------|-------------|-------------|
| N | -0.21617100 | -1.22982300 | 1.19848200  |
| N | -2.30710300 | -0.75887600 | 0.87584500  |
| F | 1.68733900  | -0.80508400 | -2.54801500 |
| C | -1.06552300 | -0.60407100 | 0.32159000  |



|   |             |             |             |
|---|-------------|-------------|-------------|
| F | 0.01377100  | 2.46561100  | 0.50375800  |
| C | -2.23937300 | -1.46644800 | 2.07598400  |
| H | -3.13640600 | -1.69055900 | 2.66049200  |
| C | -0.91683300 | -1.76134700 | 2.28130000  |
| H | -0.40671300 | -2.30376700 | 3.08248200  |
| C | 1.20778100  | -1.35963700 | 1.01539000  |
| C | -3.53152700 | -0.26994400 | 0.29628400  |
| C | 2.06479100  | -0.48227300 | 1.71888700  |
| C | -4.01235900 | 0.99398100  | 0.70026400  |
| C | -4.19687700 | -1.07491900 | -0.65122600 |
| C | 1.68605000  | -2.33643000 | 0.11737600  |
| C | 3.44097000  | -0.57559300 | 1.45568000  |
| H | 4.12464500  | 0.12543300  | 1.96188800  |
| C | 3.96464300  | -1.50870400 | 0.53666900  |
| F | 4.15868000  | 0.23431600  | -2.29324900 |
| C | 3.07580900  | -2.39130100 | -0.10357900 |
| H | 3.46794700  | -3.12610700 | -0.82468100 |
| C | -5.40178500 | -0.58392000 | -1.18797400 |
| H | -5.94002500 | -1.19664900 | -1.92966700 |
| C | 0.72689800  | 0.79708300  | -1.05237200 |
| C | -5.22054700 | 1.43833100  | 0.13396200  |
| H | -5.61431900 | 2.42364000  | 0.43323200  |
| C | -5.92900000 | 0.66639100  | -0.80949800 |
| C | 1.82724400  | 0.27810400  | -1.75418300 |
| F | 4.60748800  | 2.36817700  | -0.63182900 |
| F | 2.50622800  | 3.48662800  | 0.75839700  |
| C | 1.00597800  | 1.90951500  | -0.24345300 |
| C | 3.12668300  | 0.80123600  | -1.64101500 |
| C | 3.36029900  | 1.89462800  | -0.79292900 |
| C | 2.28710100  | 2.46238100  | -0.08614200 |
| H | -1.63557200 | 0.95808700  | -1.25543600 |
| B | -0.74857700 | 0.12317600  | -1.07204300 |
| C | 1.52082500  | 0.53247000  | 2.69397900  |
| H | 0.62481800  | 1.04705700  | 2.29605500  |
| H | 1.22536900  | 0.05677100  | 3.65444000  |

|   |             |             |             |
|---|-------------|-------------|-------------|
| H | 2.28016900  | 1.30515500  | 2.92063500  |
| C | 0.73452900  | -3.23652100 | -0.62830700 |
| H | 0.21296300  | -2.66359400 | -1.42427000 |
| H | 1.27511000  | -4.07488400 | -1.10777300 |
| H | -0.04619300 | -3.65709400 | 0.03868700  |
| C | 5.43832000  | -1.50396100 | 0.21173200  |
| H | 6.06025400  | -1.44190900 | 1.12835800  |
| H | 5.73781000  | -2.40737500 | -0.35467700 |
| H | 5.68186700  | -0.61967200 | -0.41437500 |
| C | -3.22123900 | 1.84426100  | 1.66169500  |
| H | -2.99969400 | 1.30667300  | 2.60765700  |
| H | -2.24416500 | 2.12351000  | 1.21422600  |
| H | -3.76614600 | 2.77403700  | 1.91388300  |
| C | -3.60750900 | -2.39201900 | -1.09047000 |
| H | -2.65839100 | -2.22242900 | -1.64303500 |
| H | -3.36508700 | -3.04583000 | -0.22646000 |
| H | -4.30272500 | -2.93981400 | -1.75500800 |
| C | -7.20443400 | 1.18943700  | -1.42796800 |
| H | -7.81134400 | 1.75749800  | -0.69389500 |
| H | -6.97947400 | 1.88146500  | -2.26893400 |
| H | -7.82917500 | 0.36931000  | -1.83437600 |
| H | -0.83675900 | -0.74513700 | -1.95113600 |

**D-H (BP86-D3/Def2-SVP, PCM, Fluorobenzene)**

**SCF Done: E(RB-P86) = -1677.01115414 A.U.**

|   |             |             |             |
|---|-------------|-------------|-------------|
| N | -0.21787800 | -1.22933700 | 1.18822600  |
| N | -2.30788100 | -0.75216300 | 0.87380400  |
| F | 1.68757300  | -0.78759600 | -2.54929200 |
| C | -1.06810700 | -0.59786800 | 0.31793500  |
| F | 0.02294800  | 2.49064800  | 0.50126900  |
| C | -2.23870700 | -1.46534300 | 2.07076600  |
| H | -3.13337000 | -1.69225600 | 2.65790500  |
| C | -0.91665700 | -1.76454400 | 2.27097800  |
| H | -0.40751800 | -2.31215500 | 3.06932300  |
| C | 1.20513700  | -1.36176800 | 1.00187300  |
| C | -3.53338300 | -0.26574100 | 0.29462100  |
| C | 2.06649000  | -0.49055800 | 1.70797700  |

|   |             |             |             |
|---|-------------|-------------|-------------|
| C | -4.02048800 | 0.99515000  | 0.70184900  |
| C | -4.19758300 | -1.07447600 | -0.65102800 |
| C | 1.67913500  | -2.34167800 | 0.10478700  |
| C | 3.44305300  | -0.59108200 | 1.44648800  |
| H | 4.13031000  | 0.10290200  | 1.95753600  |
| C | 3.96262700  | -1.52741000 | 0.52777100  |
| F | 4.16329200  | 0.23788000  | -2.28608200 |
| C | 3.06927100  | -2.40442200 | -0.11518700 |
| H | 3.45875300  | -3.14481700 | -0.83218700 |
| C | -5.40237100 | -0.58505400 | -1.19160800 |
| H | -5.93973300 | -1.20046800 | -1.93161700 |
| C | 0.73183800  | 0.81244400  | -1.04678500 |
| C | -5.22831600 | 1.43820200  | 0.13224800  |
| H | -5.62709100 | 2.42059000  | 0.43420000  |
| C | -5.93252500 | 0.66546400  | -0.81501600 |
| C | 1.83174300  | 0.29064900  | -1.74700100 |
| F | 4.61846000  | 2.37073000  | -0.62293100 |
| F | 2.51914900  | 3.49991500  | 0.76024200  |
| C | 1.01445400  | 1.92443100  | -0.23817400 |
| C | 3.13346500  | 0.80609100  | -1.63060300 |
| C | 3.36997000  | 1.89870900  | -0.78306200 |
| C | 2.29787800  | 2.47098700  | -0.07943500 |
| H | -1.62775000 | 0.98826500  | -1.24649300 |
| B | -0.74702700 | 0.14144400  | -1.07220800 |
| C | 1.52781100  | 0.51976800  | 2.69013700  |
| H | 0.62336500  | 1.02878400  | 2.30443000  |
| H | 1.24380200  | 0.03790400  | 3.65060900  |
| H | 2.28669100  | 1.29381200  | 2.91356900  |
| C | 0.72311700  | -3.24581400 | -0.63066500 |
| H | 0.16887700  | -2.67313400 | -1.40410400 |
| H | 1.26431000  | -4.06871000 | -1.13529500 |
| H | -0.03263300 | -3.68770600 | 0.05110500  |
| C | 5.43912100  | -1.53955400 | 0.21450100  |
| H | 6.05327300  | -1.53239700 | 1.13853800  |
| H | 5.72400700  | -2.42296600 | -0.38949700 |

|   |             |             |             |
|---|-------------|-------------|-------------|
| H | 5.71022800  | -0.63250300 | -0.36595300 |
| C | -3.24408400 | 1.83802900  | 1.68213400  |
| H | -3.06847700 | 1.30230800  | 2.63873700  |
| H | -2.24554400 | 2.09365900  | 1.27004000  |
| H | -3.77879900 | 2.78013800  | 1.90839900  |
| C | -3.61546500 | -2.40013800 | -1.07501600 |
| H | -2.64972900 | -2.25064900 | -1.60357500 |
| H | -3.40528800 | -3.05455500 | -0.20314000 |
| H | -4.30261500 | -2.93851400 | -1.75511400 |
| C | -7.20874000 | 1.18516600  | -1.43454000 |
| H | -7.81945300 | 1.74707500  | -0.69907200 |
| H | -6.98426300 | 1.88350700  | -2.27030400 |
| H | -7.82676400 | 0.36381200  | -1.84819700 |
| H | -0.83404600 | -0.71068100 | -1.96755000 |

**I (BP86-D3/Def2-SVP)**

**SCF Done: E(RB-P86) = -2856.18410406 A.U.**

|    |             |             |             |
|----|-------------|-------------|-------------|
| Al | -0.00004100 | -0.62045500 | 0.00001300  |
| F  | 1.93098400  | -0.69600100 | 2.48844100  |
| N  | -0.99255300 | 2.18259400  | 0.44856800  |
| N  | 0.99250400  | 2.18270100  | -0.44814900 |
| F  | 1.63268100  | -2.28374400 | -1.97015700 |
| F  | 4.43257000  | -1.79943200 | 2.71906300  |
| F  | -1.93068500 | -0.69487600 | -2.48814600 |
| C  | -0.00002600 | 1.36395400  | 0.00012300  |
| F  | -1.63319200 | -2.28486000 | 1.96971700  |
| C  | 0.62657600  | 3.50964900  | -0.28940000 |
| H  | 1.27443300  | 4.33555200  | -0.59619800 |
| C  | -0.62671800 | 3.50958600  | 0.28992400  |
| H  | -1.27460200 | 4.33540900  | 0.59687700  |
| C  | -2.20221900 | 1.62654600  | 1.02393000  |
| C  | 2.20225300  | 1.62677000  | -1.02345500 |
| C  | -2.10066000 | 1.02729100  | 2.30742200  |
| F  | 5.54906100  | -3.08518900 | 0.57624600  |
| F  | 4.16935800  | -3.32284800 | -1.77713400 |
| C  | 3.37075000  | 1.59371800  | -0.22260800 |
| C  | 2.10096700  | 1.02800400  | -2.30718100 |

|   |             |             |             |
|---|-------------|-------------|-------------|
| C | -3.37089900 | 1.59384100  | 0.22335600  |
| C | -0.84592700 | 1.17494000  | 3.17017400  |
| H | 0.04508900  | 1.08922600  | 2.50761000  |
| C | -3.24002800 | 0.34401700  | 2.77563000  |
| H | -3.21135900 | -0.14645100 | 3.75792800  |
| C | -4.40183900 | 0.25905500  | 1.99537000  |
| H | -5.26913400 | -0.30392800 | 2.37277500  |
| F | -4.43224800 | -1.79822300 | -2.71977300 |
| C | 3.45734500  | 2.34676600  | 1.10131900  |
| H | 2.42904800  | 2.41017400  | 1.52151400  |
| C | 0.84646400  | 1.17606400  | -3.17018600 |
| H | -0.04470100 | 1.09065600  | -2.50779400 |
| C | -4.47206500 | 0.88681900  | 0.74332200  |
| H | -5.39672300 | 0.81835700  | 0.15231300  |
| C | 3.24042900  | 0.34485500  | -2.77537600 |
| H | 3.21196800  | -0.14524300 | -3.75786600 |
| C | -3.45783400 | 2.34731100  | -1.10031100 |
| H | -2.42959200 | 2.41123800  | -1.52055200 |
| C | -1.72337000 | -1.48129900 | -0.25704800 |
| C | 1.72325400  | -1.48138300 | 0.25700500  |
| C | -3.96003400 | 3.78664300  | -0.83864200 |
| H | -5.00057500 | 3.76665100  | -0.45395900 |
| H | -3.95240800 | 4.38111700  | -1.77484200 |
| H | -3.34802100 | 4.32113300  | -0.08491400 |
| C | 2.46176800  | -1.37429700 | 1.44040000  |
| C | 4.47201300  | 0.88687500  | -0.74258200 |
| H | 5.39653300  | 0.81816200  | -0.15138600 |
| C | -0.80439200 | 2.58397700  | 3.80337400  |
| H | -0.83407500 | 3.38820900  | 3.04132900  |
| H | 0.12085800  | 2.71466700  | 4.40065800  |
| H | -1.67269400 | 2.72871700  | 4.47877300  |
| C | -4.34520300 | 1.66870900  | -2.15541900 |
| H | -4.02877600 | 0.63298300  | -2.37100100 |
| H | -4.29866600 | 2.23713600  | -3.10583100 |
| H | -5.41045300 | 1.64797400  | -1.84700800 |

|   |             |             |             |
|---|-------------|-------------|-------------|
| C | -0.70346600 | 0.08973600  | 4.24736000  |
| H | -1.47348900 | 0.19632200  | 5.03899700  |
| H | 0.28451100  | 0.17651500  | 4.74041000  |
| H | -0.78592000 | -0.92879900 | 3.82204500  |
| C | 4.40205700  | 0.25958000  | -1.99488900 |
| H | 5.26942400  | -0.30328500 | -2.37230400 |
| C | 0.70385900  | 0.09088100  | -4.24737600 |
| H | 1.47404100  | 0.19720900  | -5.03889200 |
| H | -0.28401100 | 0.17793700  | -4.74059300 |
| H | 0.78594300  | -0.92766500 | -3.82201500 |
| C | -2.46171100 | -1.37363800 | -1.44050400 |
| C | 4.34491200  | 1.66815400  | 2.15625100  |
| H | 4.02885000  | 0.63225500  | 2.37153000  |
| H | 4.29815000  | 2.23628000  | 3.10683300  |
| H | 5.41017800  | 1.64788600  | 1.84786500  |
| F | -5.54908100 | -3.08506800 | -0.57777300 |
| C | 3.95904900  | 3.78636700  | 0.84017800  |
| H | 4.99962600  | 3.76685400  | 0.45556600  |
| H | 3.95114800  | 4.38051400  | 1.77658200  |
| H | 3.34691800  | 4.32090900  | 0.08658400  |
| C | 2.31836100  | -2.16826200 | -0.80770900 |
| C | 3.74349800  | -1.92545200 | 1.58198600  |
| F | -4.16975500 | -3.32391200 | 1.77569400  |
| C | -2.31862900 | -2.16875200 | 0.80721200  |
| C | 0.80554900  | 2.58510300  | -3.80341800 |
| H | 0.83535300  | 3.38933000  | -3.04137300 |
| H | -0.11953300 | 2.71610500  | -4.40089500 |
| H | 1.67403700  | 2.72955300  | -4.47864100 |
| C | 4.32007800  | -2.58733100 | 0.47817300  |
| C | 3.60660000  | -2.71814000 | -0.73048500 |
| C | -3.74339500 | -1.92475000 | -1.58262200 |
| C | -4.32014000 | -2.58719900 | -0.47923500 |
| C | -3.60685200 | -2.71861300 | 0.72946700  |

**I (BP86-D3/Def2-SVP, PCM, Fluorobenzene)**

**SCF Done: E(RB-P86) = -2856.23036386 A.U.**

|    |             |            |             |
|----|-------------|------------|-------------|
| Al | -0.00032000 | 0.58832500 | -0.00001200 |
|----|-------------|------------|-------------|

|   |             |             |             |
|---|-------------|-------------|-------------|
| F | 1.97099100  | 0.63578000  | -2.44213500 |
| N | -0.99396400 | -2.20959600 | -0.44205700 |
| N | 0.99503600  | -2.20835900 | 0.44515100  |
| F | 1.59751200  | 2.33374100  | 1.97264200  |
| F | 4.45284000  | 1.77863100  | -2.67580100 |
| F | -1.97202000 | 0.64139600  | 2.44245400  |
| C | 0.00014800  | -1.39004000 | 0.00124700  |
| F | -1.59816200 | 2.32860300  | -1.97645400 |
| C | 0.62920500  | -3.53520100 | 0.28878500  |
| H | 1.27293200  | -4.36371700 | 0.59663500  |
| C | -0.62694200 | -3.53598400 | -0.28472900 |
| H | -1.27009900 | -4.36526100 | -0.59173200 |
| C | -2.20124000 | -1.64600400 | -1.01300700 |
| C | 2.20184500  | -1.64332800 | 1.01559900  |
| C | -2.09562500 | -1.03818000 | -2.29235800 |
| F | 5.52128600  | 3.14336800  | -0.55619900 |
| F | 4.10800500  | 3.42026800  | 1.77397100  |
| C | 3.37039800  | -1.60600200 | 0.21542000  |
| C | 2.09534800  | -1.03280500 | 2.29364900  |
| C | -3.36921500 | -1.60711500 | -0.21204000 |
| C | -0.84486500 | -1.19723400 | -3.15844800 |
| H | 0.04804100  | -1.13273500 | -2.49724600 |
| C | -3.22604700 | -0.33477300 | -2.75258700 |
| H | -3.19303600 | 0.16371600  | -3.73063800 |
| C | -4.38421200 | -0.23888200 | -1.96792000 |
| H | -5.24298700 | 0.34298800  | -2.33569700 |
| F | -4.45434900 | 1.78356800  | 2.67260400  |
| C | 3.46719200  | -2.37301100 | -1.09939100 |
| H | 2.44210200  | -2.45245200 | -1.52276900 |
| C | 0.84424700  | -1.19045000 | 3.15957500  |
| H | -0.04857600 | -1.12643700 | 2.49817800  |
| C | -4.46137200 | -0.87908100 | -0.72259100 |
| H | -5.38277800 | -0.80082900 | -0.12805600 |
| C | 3.22534200  | -0.32823900 | 2.75310200  |
| H | 3.19165200  | 0.17226400  | 3.73009400  |

|   |             |             |             |
|---|-------------|-------------|-------------|
| C | -3.46445300 | -2.37122600 | 1.10456700  |
| H | -2.43909700 | -2.44759900 | 1.52792600  |
| C | -1.72236200 | 1.46913200  | 0.23042500  |
| C | 1.72155800  | 1.46898400  | -0.23219900 |
| C | -3.97863500 | -3.80361900 | 0.82875900  |
| H | -5.01756100 | -3.76855100 | 0.43988200  |
| H | -3.97973800 | -4.40272700 | 1.76210900  |
| H | -3.36691400 | -4.33839800 | 0.07588100  |
| C | 2.47617800  | 1.34566600  | -1.40392700 |
| C | 4.46211800  | -0.87673900 | 0.72518400  |
| H | 5.38394700  | -0.79984500 | 0.13111600  |
| C | -0.82556000 | -2.60085100 | -3.80395400 |
| H | -0.86594000 | -3.41049600 | -3.04864200 |
| H | 0.09840200  | -2.73748400 | -4.40186400 |
| H | -1.69716900 | -2.72433900 | -4.47963600 |
| C | -4.35125200 | -1.69577300 | 2.16210700  |
| H | -4.03438200 | -0.66052000 | 2.37910000  |
| H | -4.30068600 | -2.26789200 | 3.11029300  |
| H | -5.41661900 | -1.67445600 | 1.85365800  |
| C | -0.68851300 | -0.10424700 | -4.22575200 |
| H | -1.46447600 | -0.18955400 | -5.01421100 |
| H | 0.29657500  | -0.20463600 | -4.72225000 |
| H | -0.75182100 | 0.91083100  | -3.78837100 |
| C | 4.38404900  | -0.23384900 | 1.96903800  |
| H | 5.24250300  | 0.34888300  | 2.33618500  |
| C | 0.68797300  | -0.09626900 | 4.22566000  |
| H | 1.46364500  | -0.18106000 | 5.01445800  |
| H | -0.29731500 | -0.19574000 | 4.72193300  |
| H | 0.75181800  | 0.91833900  | 3.78724600  |
| C | -2.47718300 | 1.34843300  | 1.40231000  |
| C | 4.35263900  | -1.69836300 | -2.15858900 |
| H | 4.03332900  | -0.66447000 | -2.37841300 |
| H | 4.30352000  | -2.27319000 | -3.10522000 |
| H | 5.41791400  | -1.67369900 | -1.85009400 |
| F | -5.52286600 | 3.14278700  | 0.54946500  |



|   |             |             |             |
|---|-------------|-------------|-------------|
| C | 3.98430300  | -3.80361400 | -0.81983700 |
| H | 5.02312800  | -3.76533400 | -0.43095800 |
| H | 3.98676000  | -4.40517900 | -1.75160100 |
| H | 3.37364000  | -4.33763300 | -0.06554300 |
| C | 2.29271200  | 2.19456800  | 0.81955700  |
| C | 3.74877800  | 1.91696500  | -1.54601700 |
| F | -4.10915700 | 3.41444200  | -1.78111400 |
| C | -2.29358800 | 2.19194000  | -0.82319900 |
| C | 0.82432200  | -2.59337600 | 3.80654800  |
| H | 0.86500200  | -3.40379000 | 3.05208400  |
| H | -0.09997600 | -2.72923000 | 4.40411000  |
| H | 1.69556700  | -2.71628700 | 4.48280700  |
| C | 4.29988500  | 2.61870600  | -0.45599700 |
| C | 3.57033500  | 2.76832300  | 0.73883200  |
| C | -3.75006300 | 1.91953900  | 1.54267000  |
| C | -4.30122100 | 2.61841100  | 0.45083500  |
| C | -3.57145600 | 2.76537500  | -0.74418900 |

**I-F (BP86-D3/Def2-SVP)**

**SCF Done: E(RB-P86) = -2956.24215214 A.U.**

|    |             |             |             |
|----|-------------|-------------|-------------|
| Al | -0.19033200 | -0.00840900 | -1.08848400 |
| F  | -0.78255900 | -0.97776700 | -2.36337600 |
| F  | 1.64250600  | 2.55171300  | -0.30733200 |
| F  | 2.15691000  | -1.83955800 | -2.10218900 |
| F  | -0.18568800 | 2.36431000  | -2.96585700 |
| F  | -2.33335800 | 1.26787500  | 1.14879300  |
| F  | 4.31345500  | 2.90482200  | -0.42061700 |
| F  | -1.38003300 | 4.81619200  | -2.92013700 |
| F  | 5.92965200  | 0.92682800  | -1.42367100 |
| F  | -3.50734400 | 3.68616800  | 1.18562800  |
| F  | 4.83171400  | -1.43620900 | -2.29003800 |
| F  | -3.04662500 | 5.48484800  | -0.84792100 |
| C  | -0.54683300 | -1.06638200 | 0.63302700  |
| C  | -0.61607300 | -1.62949300 | 2.83523000  |
| H  | -0.28538100 | -1.63258600 | 3.87728300  |
| C  | 1.36932300  | -0.30364900 | 2.02473000  |
| C  | 2.38687200  | 1.53753700  | -0.81149900 |

|   |             |             |             |
|---|-------------|-------------|-------------|
| C | -2.49406200 | -2.42888400 | -0.14233500 |
| C | -2.83070500 | -3.94137400 | -1.98721700 |
| H | -2.44647300 | -4.67596800 | -2.70870800 |
| C | -1.68489400 | -2.23101700 | 2.21920200  |
| H | -2.47480400 | -2.88160300 | 2.60522100  |
| C | 2.52958500  | -1.06229000 | 1.70493600  |
| C | -1.01190700 | 2.66107300  | -1.93626300 |
| C | 2.64627100  | -0.63256800 | -1.71903700 |
| C | -0.48865800 | -3.81326900 | -0.98488200 |
| H | 0.10797300  | -2.92585700 | -0.69101400 |
| C | -2.07536200 | 2.10397000  | 0.10047900  |
| C | -3.84766300 | -2.02324000 | -0.17118300 |
| C | -2.70217200 | 3.35865400  | 0.15967100  |
| C | 0.16942100  | 1.76031900  | 2.95847800  |
| H | -0.70512200 | 1.21892000  | 2.55375800  |
| C | -1.95003600 | -3.37952200 | -1.04611600 |
| C | -4.18424700 | -3.57544500 | -2.02904900 |
| H | -4.85100600 | -4.03009600 | -2.77829200 |
| C | 3.77210400  | 1.76261500  | -0.87277500 |
| C | -1.60739700 | 3.93384200  | -1.93721400 |
| C | 4.60247000  | 0.75001000  | -1.38074600 |
| C | 1.41897200  | 1.03079000  | 2.48651900  |
| C | 1.77893200  | 0.34211500  | -1.21371600 |
| C | -1.21947500 | 1.70841800  | -0.92778000 |
| C | -4.68470000 | -2.62465800 | -1.13359600 |
| H | -5.74371700 | -2.32804500 | -1.18438900 |
| C | -2.46418500 | 4.28007000  | -0.87417600 |
| C | -4.40834700 | -0.95920400 | 0.76283300  |
| H | -3.57415500 | -0.57254200 | 1.37674600  |
| C | 4.03554200  | -0.45653200 | -1.82532300 |
| C | 3.84458000  | 0.93974900  | 2.20439700  |
| H | 4.82252900  | 1.44368000  | 2.23818700  |
| C | -0.28615600 | -4.89142800 | 0.09994600  |
| H | -0.60071500 | -4.53620800 | 1.10261600  |
| H | 0.78311400  | -5.18235700 | 0.16456500  |

|   |             |             |             |
|---|-------------|-------------|-------------|
| H | -0.87459900 | -5.80293400 | -0.13631300 |
| C | 2.68819500  | 1.64021900  | 2.56376000  |
| H | 2.76271800  | 2.68764800  | 2.89088600  |
| C | 2.44252100  | -2.54689300 | 1.35614000  |
| H | 1.53596000  | -2.68998900 | 0.73088900  |
| C | 0.07274100  | 3.21067300  | 2.45571200  |
| H | 0.84226900  | 3.86333700  | 2.91937200  |
| H | -0.91955200 | 3.63287800  | 2.71483000  |
| H | 0.19632400  | 3.26340300  | 1.35853800  |
| C | 3.76719800  | -0.40205000 | 1.79786100  |
| H | 4.68801600  | -0.94134700 | 1.53475200  |
| C | 0.07031300  | -4.26197800 | -2.34107100 |
| H | -0.37862400 | -5.21789000 | -2.68486100 |
| H | 1.16414100  | -4.42118400 | -2.26082100 |
| H | -0.10597300 | -3.48194000 | -3.10665300 |
| C | 0.08244900  | 1.69983800  | 4.49869500  |
| H | 0.09479300  | 0.65468600  | 4.87143800  |
| H | -0.85205500 | 2.18049200  | 4.85580600  |
| H | 0.94027300  | 2.22800600  | 4.96610700  |
| C | 2.27232900  | -3.38670000 | 2.64309000  |
| H | 3.16107200  | -3.26934200 | 3.29793400  |
| H | 2.16924700  | -4.46249300 | 2.39214400  |
| H | 1.38034700  | -3.09334600 | 3.22774200  |
| C | -5.46594100 | -1.54158800 | 1.71946600  |
| H | -6.34030400 | -1.94119300 | 1.16375500  |
| H | -5.83737300 | -0.75934700 | 2.41371500  |
| H | -5.05379700 | -2.37288500 | 2.32884600  |
| C | 3.64018800  | -3.08810900 | 0.56271800  |
| H | 3.83645700  | -2.51933800 | -0.36179800 |
| H | 3.44597000  | -4.13984300 | 0.26998600  |
| H | 4.56785400  | -3.08868000 | 1.17256700  |
| C | -4.96123000 | 0.23723600  | -0.03713900 |
| H | -4.22051300 | 0.59498700  | -0.77974500 |
| H | -5.20201300 | 1.08077300  | 0.64154500  |
| H | -5.88677700 | -0.03259000 | -0.58793200 |

N -1.61799000 -1.88070900 0.87345900

N 0.07810300 -0.94043500 1.84474000

**I-F (BP86-D3/Def2-SVP, PCM, Fluorobenzene)**

**SCF Done: E(RB-P86) = -2956.25265684 A.U.**

Al -0.19418000 0.00338000 -1.05354900

F -0.76938500 -0.92004400 -2.37762100

F 1.61769200 2.57881100 -0.26554400

F 2.15828800 -1.77430500 -2.14640600

F -0.23011100 2.36752800 -2.95707700

F -2.33157300 1.27719500 1.18409400

F 4.28310100 2.96474100 -0.40661900

F -1.45905000 4.80046000 -2.92373200

F 5.90920900 1.02150400 -1.46127200

F -3.54348100 3.67737100 1.20608100

F 4.82709900 -1.33826300 -2.35645300

F -3.12229300 5.46371700 -0.84548700

C -0.53482400 -1.08589000 0.63956700

C -0.57965300 -1.69764400 2.82911200

H -0.24252000 -1.72522800 3.86890200

C 1.38304100 -0.32892700 2.02852400

C 2.36769900 1.57897700 -0.79043100

C -2.46895500 -2.45120600 -0.15336900

C -2.80051700 -3.94691700 -2.01467300

H -2.41746900 -4.68039500 -2.73823700

C -1.64766400 -2.29660900 2.20876300

H -2.42404100 -2.96638300 2.58968500

C 2.55028000 -1.06672100 1.68547300

C -1.05364300 2.65998900 -1.91952900

C 2.64032100 -0.57102300 -1.74011800

C -0.46365200 -3.83593600 -0.99357500

H 0.13324600 -2.95352700 -0.68406800

C -2.09309800 2.10552400 0.12959300

C -3.82121200 -2.04114500 -0.18543100

C -2.73818900 3.35165500 0.17955300

C 0.16792100 1.69995500 3.02035300

H -0.70543700 1.14173700 2.63575800

|   |             |             |             |
|---|-------------|-------------|-------------|
| C | -1.92313900 | -3.39645500 | -1.06267700 |
| C | -4.15305900 | -3.57447700 | -2.06092300 |
| H | -4.81779000 | -4.02103600 | -2.81677000 |
| C | 3.74927200  | 1.82037600  | -0.86503700 |
| C | -1.66722200 | 3.92322500  | -1.92887400 |
| C | 4.58441800  | 0.82679700  | -1.40064300 |
| C | 1.42016500  | 0.99660900  | 2.51656000  |
| C | 1.76869400  | 0.38330400  | -1.20474500 |
| C | -1.23932100 | 1.71314900  | -0.90258000 |
| C | -4.65540500 | -2.62974700 | -1.15906000 |
| H | -5.71374300 | -2.33126600 | -1.21198700 |
| C | -2.52118200 | 4.26666600  | -0.86376900 |
| C | -4.38299600 | -0.99113500 | 0.76328200  |
| H | -3.54684700 | -0.60742400 | 1.37666400  |
| C | 4.02583900  | -0.37773100 | -1.85934600 |
| C | 3.84449700  | 0.94316600  | 2.20959800  |
| H | 4.81700900  | 1.45724400  | 2.24834000  |
| C | -0.27244500 | -4.92658600 | 0.08117900  |
| H | -0.59946200 | -4.58385300 | 1.08366000  |
| H | 0.79656200  | -5.21576500 | 0.15426600  |
| H | -0.85668800 | -5.83541000 | -0.17477700 |
| C | 2.68232500  | 1.62156000  | 2.59346800  |
| H | 2.74755800  | 2.66148100  | 2.94606500  |
| C | 2.47984000  | -2.54734500 | 1.31768500  |
| H | 1.56506800  | -2.69637900 | 0.70598100  |
| C | 0.03394400  | 3.14878400  | 2.52150900  |
| H | 0.80598100  | 3.81220000  | 2.96499400  |
| H | -0.95734600 | 3.55559000  | 2.80783900  |
| H | 0.12721800  | 3.20434300  | 1.42124200  |
| C | 3.78048500  | -0.39209300 | 1.77862400  |
| H | 4.70647300  | -0.91524000 | 1.50133800  |
| C | 0.10585800  | -4.27708000 | -2.34818300 |
| H | -0.34728600 | -5.22594600 | -2.70464100 |
| H | 1.19732400  | -4.44698200 | -2.25656500 |
| H | -0.05615400 | -3.49288300 | -3.11288900 |

|   |             |             |             |
|---|-------------|-------------|-------------|
| C | 0.11954200  | 1.63569600  | 4.56201400  |
| H | 0.16321200  | 0.59044800  | 4.93078100  |
| H | -0.81687800 | 2.09549400  | 4.94084600  |
| H | 0.97596000  | 2.18390300  | 5.00846600  |
| C | 2.34243700  | -3.40577600 | 2.59627500  |
| H | 3.24159500  | -3.28545300 | 3.23609600  |
| H | 2.24874800  | -4.47904700 | 2.33174900  |
| H | 1.45770500  | -3.13062600 | 3.20012200  |
| C | -5.42993000 | -1.59375700 | 1.71955800  |
| H | -6.30402700 | -1.99264900 | 1.16289200  |
| H | -5.80230700 | -0.82136400 | 2.42415300  |
| H | -5.00521800 | -2.42672700 | 2.31706700  |
| C | 3.67280900  | -3.05934600 | 0.49796900  |
| H | 3.84700800  | -2.47165600 | -0.41946000 |
| H | 3.48776000  | -4.10888300 | 0.19198300  |
| H | 4.60946300  | -3.05509000 | 1.09353200  |
| C | -4.95148300 | 0.20971300  | -0.01866200 |
| H | -4.21777900 | 0.58698100  | -0.75892600 |
| H | -5.19959200 | 1.04019300  | 0.67339300  |
| H | -5.87662900 | -0.06241400 | -0.56872500 |
| N | -1.59608300 | -1.91530300 | 0.87082200  |
| N | 0.09857100  | -0.97897800 | 1.84853500  |

**I-H (BP86-D3/Def2-SVP)**

**SCF Done: E(RB-P86) = -2856.98725541 A.U.**

|    |             |             |             |
|----|-------------|-------------|-------------|
| Al | 0.26489700  | -0.12794700 | -1.17631500 |
| F  | 1.98973400  | 1.38993600  | -3.29222700 |
| F  | 1.31969300  | 1.55850200  | 1.42817900  |
| F  | -1.16410000 | 2.40345600  | 0.11287200  |
| F  | -2.19824600 | -1.03373200 | -3.02195600 |
| F  | 3.70234400  | 3.49757100  | -3.11305800 |
| F  | -3.70540500 | 3.33110300  | -0.06746400 |
| F  | 3.02178300  | 3.64884500  | 1.59309300  |
| F  | -5.50439700 | 2.08762500  | -1.72460900 |
| F  | -4.73323600 | -0.09042500 | -3.20742100 |
| F  | 4.21506800  | 4.64252200  | -0.67293600 |
| N  | 1.30156700  | -1.86654500 | 1.06778400  |

|   |             |             |             |
|---|-------------|-------------|-------------|
| N | -0.62851100 | -1.10844500 | 1.69442400  |
| C | -2.01271100 | 1.77264100  | -0.73706300 |
| C | 0.25281700  | -1.09130400 | 0.64847500  |
| C | 2.36896600  | -2.30740900 | 0.19418100  |
| C | -0.13150100 | -1.86774200 | 2.75295300  |
| H | -0.69791500 | -2.00457500 | 3.67785000  |
| C | -1.95161200 | -0.51743600 | 1.68766600  |
| C | 3.62330200  | -1.65476400 | 0.23798700  |
| C | -2.51912200 | 0.06827800  | -2.30094600 |
| C | 2.74528300  | 3.10695900  | 0.39390500  |
| C | 2.22867700  | 1.91731100  | -2.07011900 |
| C | -2.18093000 | 0.63387000  | 2.47736400  |
| C | 1.87623700  | 2.01337400  | 0.26753000  |
| C | 1.08765100  | -2.35196400 | 2.35374400  |
| H | 1.80576500  | -3.00876300 | 2.85190300  |
| C | -1.57393600 | 0.65021300  | -1.44845300 |
| C | 3.11304900  | 3.01109900  | -2.01047000 |
| C | 4.36386200  | -3.17172400 | -1.53412600 |
| H | 5.15276900  | -3.50693800 | -2.22538700 |
| C | 2.08340500  | -3.38472200 | -0.68177500 |
| C | 3.11292800  | -3.80325700 | -1.54498700 |
| H | 2.92573800  | -4.63238800 | -2.24386000 |
| C | 0.74235800  | -4.10959300 | -0.66480700 |
| H | 0.02162100  | -3.47432000 | -0.11387800 |
| C | 1.58891000  | 1.38058600  | -0.94438600 |
| C | 3.36910800  | 3.60796800  | -0.76214600 |
| C | -4.23879600 | 1.65075600  | -1.66417300 |
| C | -3.31651000 | 2.28544900  | -0.81500500 |
| C | -2.96388600 | -1.13749500 | 0.90239000  |
| C | 4.61605200  | -2.11333400 | -0.65078900 |
| H | 5.60199100  | -1.62623900 | -0.65396600 |
| C | -1.11016100 | 1.23016000  | 3.38459400  |
| H | -0.13103800 | 0.83178400  | 3.05582500  |
| C | 3.91428600  | -0.53874400 | 1.23305200  |
| H | 2.94734300  | -0.06153100 | 1.48755900  |

|   |             |             |             |
|---|-------------|-------------|-------------|
| C | -3.83804500 | 0.53889100  | -2.42433900 |
| C | 0.86820500  | -5.43570700 | 0.11287900  |
| H | 1.58178000  | -6.12405600 | -0.38713500 |
| H | -0.11400900 | -5.94884200 | 0.17591000  |
| H | 1.23347700  | -5.26735600 | 1.14702900  |
| C | -4.48207400 | 0.63141900  | 1.65535500  |
| H | -5.47623900 | 1.10235300  | 1.61514200  |
| C | -1.02890300 | 2.76477600  | 3.29393100  |
| H | -0.96287400 | 3.10049700  | 2.24391500  |
| H | -0.13168600 | 3.12913900  | 3.83425900  |
| H | -1.91344100 | 3.25018300  | 3.75786100  |
| C | -2.71404300 | -2.43005400 | 0.12191600  |
| H | -1.77158800 | -2.29271000 | -0.45351500 |
| C | -3.47290000 | 1.19786500  | 2.43968400  |
| H | -3.67945000 | 2.10739300  | 3.02233400  |
| C | 0.15570100  | -4.32178200 | -2.07006400 |
| H | 0.07277100  | -3.35695100 | -2.60863900 |
| H | -0.85771900 | -4.76811000 | -1.99530800 |
| H | 0.77408400  | -5.01384000 | -2.67931100 |
| C | -4.23109800 | -0.52657100 | 0.90373200  |
| H | -5.03821300 | -0.95726500 | 0.29602800  |
| C | -1.34425100 | 0.78767900  | 4.84533200  |
| H | -2.31455800 | 1.17410000  | 5.22253500  |
| H | -0.54192300 | 1.17802200  | 5.50551700  |
| H | -1.36815200 | -0.31610900 | 4.95309300  |
| C | -3.81627900 | -2.77449600 | -0.89051900 |
| H | -4.76488800 | -3.04446100 | -0.38031700 |
| H | -3.50433200 | -3.65234900 | -1.49085000 |
| H | -4.02652700 | -1.95286400 | -1.59773900 |
| C | 4.83761300  | 0.54815300  | 0.65744500  |
| H | 5.88079400  | 0.18504800  | 0.54397900  |
| H | 4.86713400  | 1.42263200  | 1.33798600  |
| H | 4.48435000  | 0.89503600  | -0.33329700 |
| C | 4.50635900  | -1.11615700 | 2.53696800  |
| H | 3.82742500  | -1.85263100 | 3.01167900  |



|   |             |             |             |
|---|-------------|-------------|-------------|
| H | 4.69366700  | -0.30577600 | 3.27179000  |
| H | 5.47033300  | -1.62991400 | 2.33744200  |
| C | -2.52017400 | -3.63161900 | 1.07428400  |
| H | -1.66628300 | -3.50397900 | 1.76559500  |
| H | -2.33800000 | -4.55667800 | 0.48972000  |
| H | -3.43367400 | -3.78964700 | 1.68501200  |
| H | 0.70024500  | -1.22772600 | -2.24756400 |

**I-H (BP86-D3/Def2-SVP, PCM, Fluorobenzene)**

**SCF Done: E(RB-P86) = -2856.99667175 A.U.**

|    |             |             |             |
|----|-------------|-------------|-------------|
| Al | -0.26472700 | 0.11010700  | -1.15254400 |
| F  | -1.99437100 | -1.42583900 | -3.27583300 |
| F  | -1.30326800 | -1.58344700 | 1.44368700  |
| F  | 1.18043600  | -2.40721600 | 0.15176400  |
| F  | 2.18022400  | 0.98112800  | -3.04966600 |
| F  | -3.70283700 | -3.53188100 | -3.08378500 |
| F  | 3.72002900  | -3.33489500 | -0.03998600 |
| F  | -3.00218100 | -3.67613100 | 1.61980700  |
| F  | 5.50144500  | -2.11659800 | -1.73520700 |
| F  | 4.71196700  | 0.03716700  | -3.24523400 |
| F  | -4.20562100 | -4.67308400 | -0.63890000 |
| N  | -1.30327900 | 1.89045200  | 1.05213800  |
| N  | 0.62986500  | 1.14486700  | 1.68448100  |
| C  | 2.02074800  | -1.78399500 | -0.71185900 |
| C  | -0.25635200 | 1.10796300  | 0.64331400  |
| C  | -2.37468400 | 2.31084700  | 0.17374200  |
| C  | 0.13831000  | 1.92587900  | 2.72951600  |
| H  | 0.70890400  | 2.08708700  | 3.64791600  |
| C  | 1.95200700  | 0.55277900  | 1.68110100  |
| C  | -3.62120300 | 1.64288900  | 0.22219800  |
| C  | 2.50964500  | -0.10606600 | -2.30722600 |
| C  | -2.73273600 | -3.13289400 | 0.41915600  |
| C  | -2.22550600 | -1.94952600 | -2.04693500 |
| C  | 2.18451900  | -0.58628500 | 2.48772500  |
| C  | -1.86446300 | -2.03889300 | 0.28862500  |
| C  | -1.08304300 | 2.40199000  | 2.32693000  |
| H  | -1.79522600 | 3.07093700  | 2.81763800  |

|   |             |             |             |
|---|-------------|-------------|-------------|
| C | 1.57330500  | -0.67268400 | -1.43542200 |
| C | -3.10890000 | -3.04273400 | -1.98239400 |
| C | -4.37845200 | 3.13623600  | -1.56382600 |
| H | -5.17120800 | 3.45700000  | -2.25749500 |
| C | -2.10229100 | 3.38711700  | -0.70782100 |
| C | -3.13583800 | 3.78532800  | -1.57700700 |
| H | -2.96096600 | 4.61450200  | -2.27908400 |
| C | -0.77115600 | 4.13023400  | -0.69232200 |
| H | -0.04396000 | 3.51242200  | -0.12976600 |
| C | -1.58141200 | -1.40893700 | -0.92650600 |
| C | -3.36052900 | -3.63667700 | -0.73277100 |
| C | 4.23716800  | -1.67555200 | -1.66365500 |
| C | 3.32431800  | -2.29614800 | -0.79493000 |
| C | 2.96194100  | 1.16238100  | 0.88454400  |
| C | -4.61854300 | 2.08067600  | -0.67255300 |
| H | -5.59950500 | 1.58361600  | -0.67217600 |
| C | 1.11878700  | -1.16429800 | 3.41272700  |
| H | 0.13779300  | -0.77010500 | 3.08346100  |
| C | -3.89962400 | 0.53713200  | 1.23220100  |
| H | -2.92823800 | 0.06765700  | 1.48502100  |
| C | 3.82731800  | -0.57692800 | -2.43690500 |
| C | -0.91793700 | 5.46493700  | 0.06701400  |
| H | -1.63464600 | 6.13814000  | -0.44893600 |
| H | 0.05884000  | 5.98816000  | 0.12914800  |
| H | -1.28844800 | 5.30518100  | 1.10033300  |
| C | 4.48357200  | -0.59531800 | 1.65764300  |
| H | 5.47930300  | -1.06360600 | 1.62488400  |
| C | 1.03717100  | -2.70038700 | 3.35313000  |
| H | 0.94876800  | -3.05738300 | 2.31155700  |
| H | 0.15251200  | -3.05392500 | 3.92092800  |
| H | 1.93171800  | -3.17554000 | 3.80799100  |
| C | 2.70958800  | 2.44667800  | 0.09162900  |
| H | 1.75786100  | 2.30933900  | -0.46851600 |
| C | 3.47687600  | -1.15069500 | 2.45400000  |
| H | 3.68825500  | -2.04784900 | 3.05411700  |

|   |             |             |             |
|---|-------------|-------------|-------------|
| C | -0.18264100 | 4.33475100  | -2.09813300 |
| H | -0.08598600 | 3.36620800  | -2.62774200 |
| H | 0.82479800  | 4.79407800  | -2.02474300 |
| H | -0.80909900 | 5.01142200  | -2.71607700 |
| C | 4.22984200  | 0.55209000  | 0.89010800  |
| H | 5.03661000  | 0.97646100  | 0.27736800  |
| C | 1.36244300  | -0.69421000 | 4.86344600  |
| H | 2.33484000  | -1.07522800 | 5.24078800  |
| H | 0.56351200  | -1.07305600 | 5.53420300  |
| H | 1.38510300  | 0.41094000  | 4.94997300  |
| C | 3.80097500  | 2.77180000  | -0.93886500 |
| H | 4.75671200  | 3.04375600  | -0.44380100 |
| H | 3.48529900  | 3.64307100  | -1.54677800 |
| H | 4.00036600  | 1.93755700  | -1.63479700 |
| C | -4.82493300 | -0.55918900 | 0.67830300  |
| H | -5.86945100 | -0.19924000 | 0.56976400  |
| H | -4.84692100 | -1.42414500 | 1.37129900  |
| H | -4.48134800 | -0.91826200 | -0.31176100 |
| C | -4.48208000 | 1.12842000  | 2.53448200  |
| H | -3.80179800 | 1.87266400  | 2.99399000  |
| H | -4.65945900 | 0.32510300  | 3.27937400  |
| H | -5.45022600 | 1.63441200  | 2.33568500  |
| C | 2.53496100  | 3.66104600  | 1.03173200  |
| H | 1.69272800  | 3.54436400  | 1.73879600  |
| H | 2.34660000  | 4.57878900  | 0.43798100  |
| H | 3.45901900  | 3.82260700  | 1.62519700  |
| H | -0.70711900 | 1.16286200  | -2.27364300 |
